# Supplementary material for: Heterocycles as supramolecular handles for crystal engineering: a case study with 7-(diethylamino)coumarin derivatives
Source: Royal Society of Chemistry journal article supplement (doi:10.1039/d4ra03656e), 2024-01-01
Supplement: d4ra03656e1.pdf [file d4ra03656e1.pdf]

## ELECTRONIC SUPPORTING INFORMATION FILE

### Heterocycles as Supramolecular Handles for Crystal Engineering:

#### A Case Study with 7-Diethylaminocoumarin Derivatives

Geraldine Castro,<sup>a</sup> Margarita Romero-Ávila,<sup>a</sup> Norberto Farfán,<sup>a\*</sup> Rafael Arcos-Ramos,<sup>b\*</sup> and Mauricio Maldonado-Domínguez.<sup>a\*</sup>

<sup>a</sup> Facultad de Química, Departamento de Química Orgánica, Universidad Nacional Autónoma de México, CDMX, México.

<sup>b</sup> Departamento de Química de Radiaciones y Radioquímica, Instituto de Ciencias Nucleares, Universidad Nacional Autónoma de México, CDMX, México.

\*email: [imardio@comunidad.unam.mx](mailto:imardio@comunidad.unam.mx)

### Table of Contents

|                                                                             | <b>Page</b> |
|-----------------------------------------------------------------------------|-------------|
| Experimental Section                                                        | 3           |
| Synthesis of compound <b>2</b>                                              | 3           |
| Synthesis of compound <b>11</b>                                             | 4           |
| Figure S1. <sup>1</sup> H NMR spectrum of Compound 2 in CDCl <sub>3</sub>   | 5           |
| Figure S2. <sup>13</sup> C NMR spectrum of Compound 2 in CDCl <sub>3</sub>  | 6           |
| Figure S3. <sup>1</sup> H NMR spectrum of Compound 11 in CDCl <sub>3</sub>  | 6           |
| Figure S4. <sup>13</sup> C NMR spectrum of Compound 11 in CDCl <sub>3</sub> | 7           |

|                                                                                                                                                                                                                                                   |    |
|---------------------------------------------------------------------------------------------------------------------------------------------------------------------------------------------------------------------------------------------------|----|
| Figure S5. FTIR-ATR spectrum of Compound <b>11</b>                                                                                                                                                                                                | 7  |
| Figure S6. HRMS (ESI) spectrum of Compound <b>11</b>                                                                                                                                                                                              | 8  |
| Figure S7. UV-Vis spectra of Compound <b>11</b>                                                                                                                                                                                                   | 8  |
| Figure S8. Selected examples (19 and 22)                                                                                                                                                                                                          | 9  |
| Figure S9. Selected examples (14, 32 and 43)                                                                                                                                                                                                      | 10 |
| Table S1. Crystallographic data of compound <b>11</b>                                                                                                                                                                                             | 11 |
| Table S2. Crystallographic data of DAC-derivatives retrieved from the crystallography open database employed in the comparative study.                                                                                                            | 12 |
| Table S3. Unit cells retrieved from the Crystallography Open Database, $A_{SASA}$ (Å <sup>2</sup> ), type of interactions, coumarin alignment, distances between the planes of the compounds that present $\pi$ -stacking and the stacking modes. | 15 |
| Table S4. Frontier molecular orbital (FMO) energies, $E_{HOMO}$ and $E_{LUMO}$ and FMO energy gap $\Delta E_{HOMO-LUMO}$ , calculated at the MN15(CPCM, $\epsilon = 3.5$ )/def2TZVP level of theory.                                              | 32 |
| Figure S10. Molecular dipole moments for DAC-H and a series of reference compounds, A-J                                                                                                                                                           | 33 |
| Figure S11. Conformational profiles for rotation around the Et <sub>2</sub> N-coumarin bond, calculated using the DFT protocol MN15(CPCM)/def2TZVP                                                                                                | 33 |
| Cartesian coordinates and DFT energies of compounds <b>1-50</b>                                                                                                                                                                                   | 34 |
| References                                                                                                                                                                                                                                        | 91 |

## Experimental Section

All reagents used were obtained from commercial suppliers and used without further purification. Solvents were dried using standard methods or distilled prior to use. Reactions were monitored by TLC on precoated silica gel plates (Aldrich Silica gel on TLC plates with 254 nm fluorescent indicator) and revealed by exposure to an UV lamp. Melting points were measured using open glass capillaries in Electrothermal Digital Programmable Melting Point Apparatus (Cole-Parmer) and are uncorrected. IR spectra were recorded using Attenuated Total Reflectance (ATR) as solid samples on a Perkin Elmer FTIR Spectrometer Spectrum Two and units are stated as  $\text{cm}^{-1}$ .  $^1\text{H}$  and  $^{13}\text{C}$  NMR spectra were recorded using a Bruker 400 MHz spectrometer; chemical shifts ( $\delta$ , ppm) are reported relative to  $\text{CDCl}_3$ . High-resolution mass spectra were acquired with Bruker micrOTOF-Q II spectrometer.

### Synthesis of 7-(diethylamino)coumarin-3- carbaldehyde, compound 2.

Compound 2 was synthesized from 4-(diethylamino)salicylaldehyde in two steps according to a literature procedure<sup>1,2</sup> to give an orange solid.  $R_f = 0.2$  (hexane/ethyl acetate, 8:2) Yield: 79%.

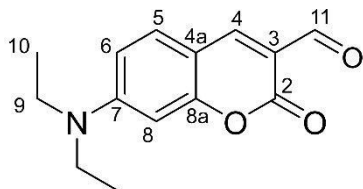

Melting point: 163–165 °C.  $^1\text{H-NMR}$  (400 MHz,  $\text{CDCl}_3$ ,  $\delta$ , ppm): 10.10 (s, 1H, H-11), 8.23 (s, 1H, H-4), 7.40 (d,  $J = 9.0$  Hz, 1H, H-5), 6.62 (dd,  $J = 9.0, 2.5$  Hz, 1H, H-6), 6.47 (d,  $J = 2.5$  Hz, 1H, H-8), 3.46 (q,  $J = 7.2$  Hz, 4H, H-9), 1.24 (t,  $J = 7.2$  Hz, 6H, H-10).  $^{13}\text{C-NMR}$  (75 MHz,  $\text{CDCl}_3$ ,  $\delta$ , ppm): 188.0 (C-11), 162.0 (C-2), 159.0 (C-8a), 153.6 (C-7), 145.5 (C-4), 132.6 (C-5), 114.4 (C-3), 110.3 (C-6), 108.3 (C-4a), 97.2 (C-8), 45.4 (C-9), 12.6 (C-10).

**Synthesis of (*E*)-3-(((4*H*-1,2,4-triazol-4-yl)imino)methyl)-7-(diethylamino)-2*H*-chromen-2-one, compound 11:**

In a round bottom flask equipped with a Dean-Stark distillation trap, 4-amino-4*H*-1,2,4-triazole (0.017 g, 0.2 mmol) and 7-diethylaminocoumarin-3-aldehyde (0.05 g, 0.2 mmol) were suspended in 5mL of a 2:1 mixture of EtOH and toluene. The mixture was stirred at reflux temperature for 150 h, frequently draining the Dean-Stark trap and adding more solvent mixture accordingly (**Scheme 1**). The product was formed as an orange precipitate. The solution was cooled in an ice bath, the solid was filtered and washed with cold toluene. The crude product was purified by chromatography on silica gel, starting with CH<sub>2</sub>Cl<sub>2</sub> 100%, followed by a linear gradient of CH<sub>2</sub>Cl<sub>2</sub>: Acetone until 8:2, to give the product as a bright orange solid that grows crystals from CH<sub>2</sub>Cl<sub>2</sub> (0.16 mmol, 50 mg, 80 %). R<sub>f</sub>=0.15 (CH<sub>2</sub>Cl<sub>2</sub>: Acetone 9:1).

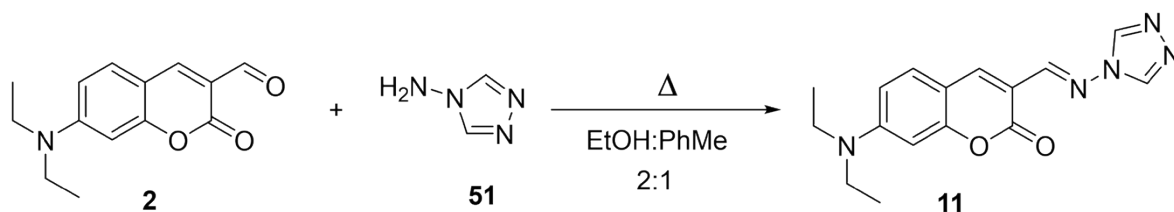

**Scheme 1.** Synthesis of Compound 11.

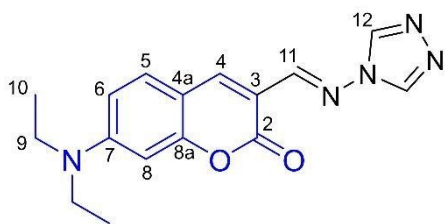

Melting point (*from* CH<sub>2</sub>Cl<sub>2</sub>): 238–240 °C. FTIR (ATR,

v, cm<sup>-1</sup>): 3105, 3080, 2968, 2950, 2930, 1701, 1603, 1570, 1516, 1502, 1478, 1424, 1351, 1255, 1188, 1180,

1127. <sup>1</sup>H-NMR (400 MHz, CDCl<sub>3</sub>, δ, ppm): 8.75 (s, 1H,

H-11), 8.57 (s, 2H, H-12), 8.40 (s, 1H, H-4), 7.40 (d, J = 9.0 Hz, 1H, H-5), 6.65 (dd, J = 9.0,

2.5 Hz, 1H, H-6), 6.49 (d, J = 2.5 Hz, 1H, H-8), 3.46 (q, J = 7.2 Hz, 4H, H-9), 1.24 (t, J = 7.2

Hz, 6H, H-10). <sup>13</sup>C-NMR (75 MHz, CDCl<sub>3</sub>, δ, ppm): 161.4 (C-2), 158.1 (C-8a), 153.0 (C-7),

151.8 (C-11), 142.2 (C-4), 138.3 (C-12), 131.5 (C-5), 110.3 (C-6), 110.1 (C-3), 108.5 (C-4a),

97.3 (C-8), 45.3 (C-9), 12.6 (C-10). HRMS (ESI): calculated for C<sub>16</sub>H<sub>17</sub>N<sub>5</sub>O<sub>2</sub>Na ([M+Na]<sup>+</sup>)

334.1274, found [C<sub>16</sub>H<sub>17</sub>N<sub>5</sub>O<sub>2</sub>+Na]<sup>+</sup> 334.1283. Error: 2.693583 ppm.

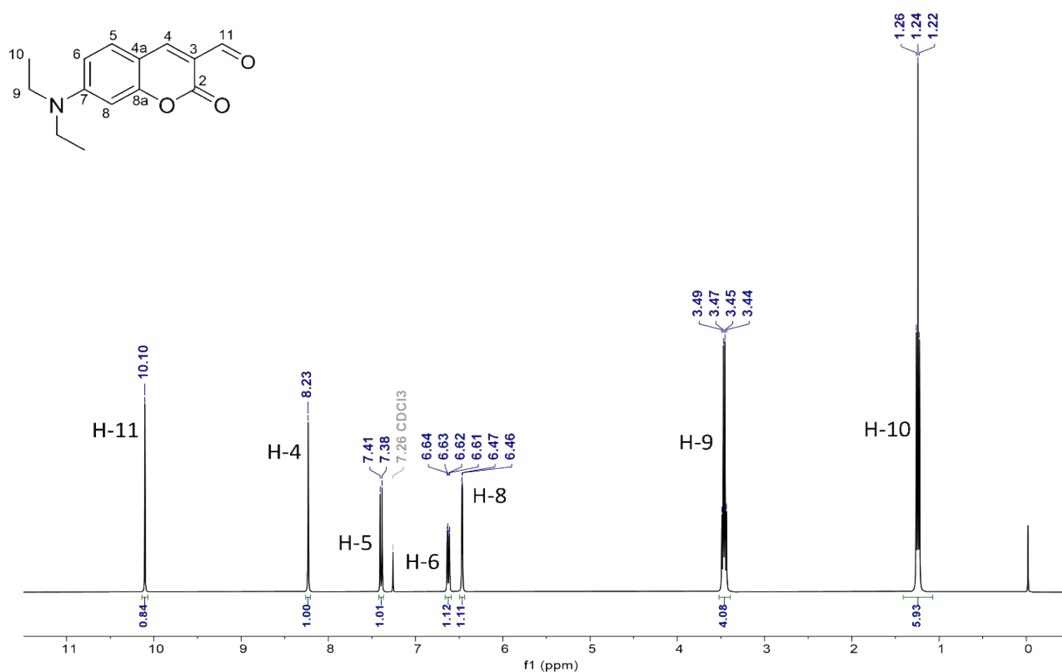

**Figure S1.** <sup>1</sup>H NMR spectrum of **Compound 2** in CDCl<sub>3</sub>.

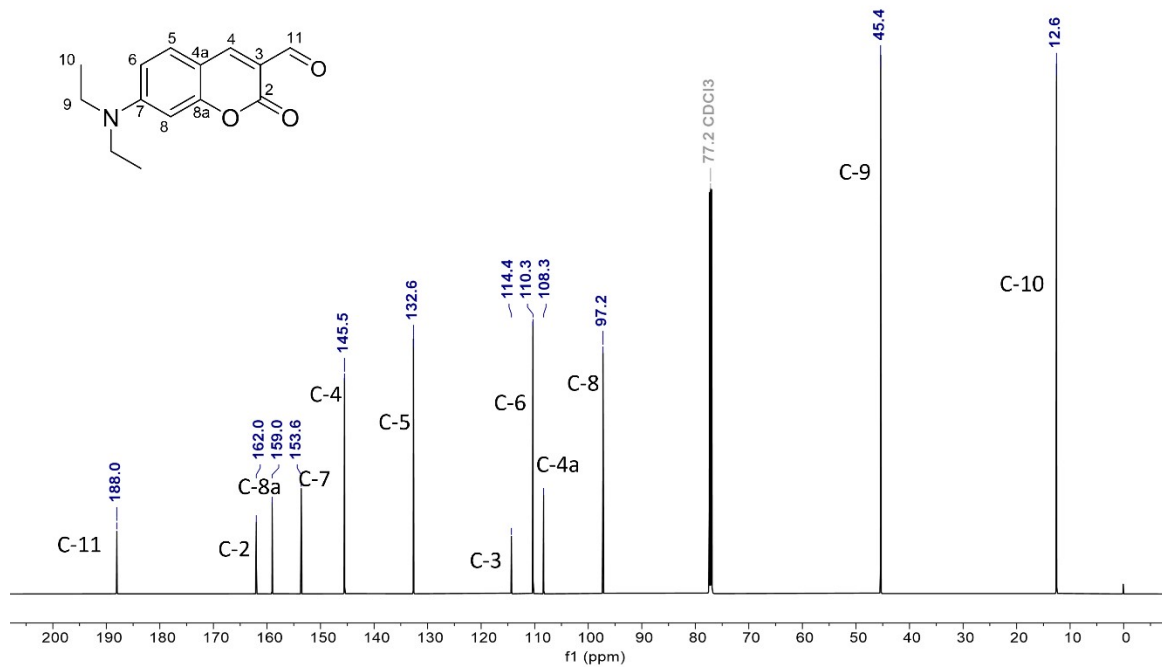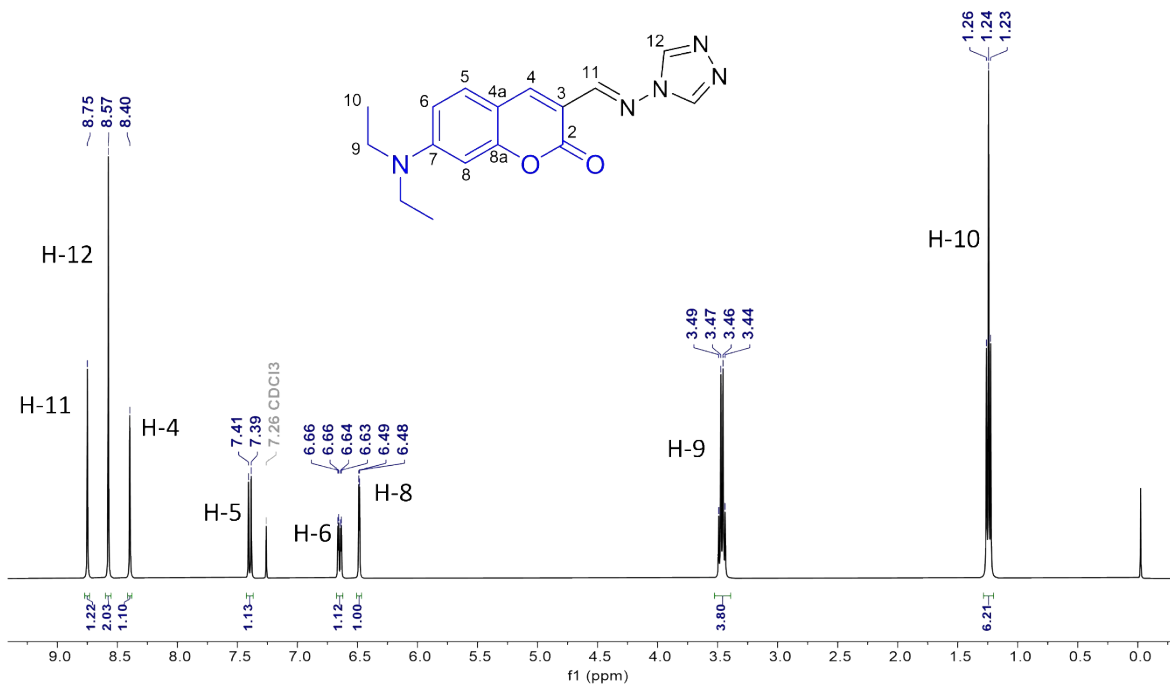

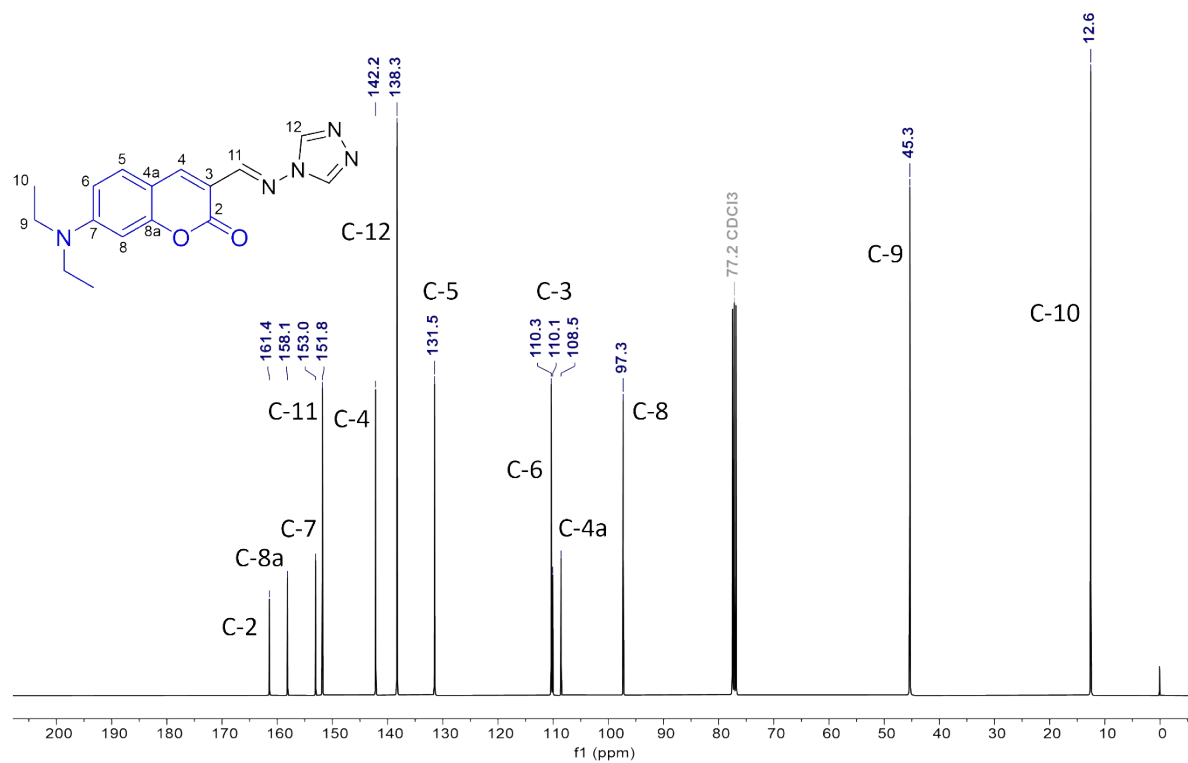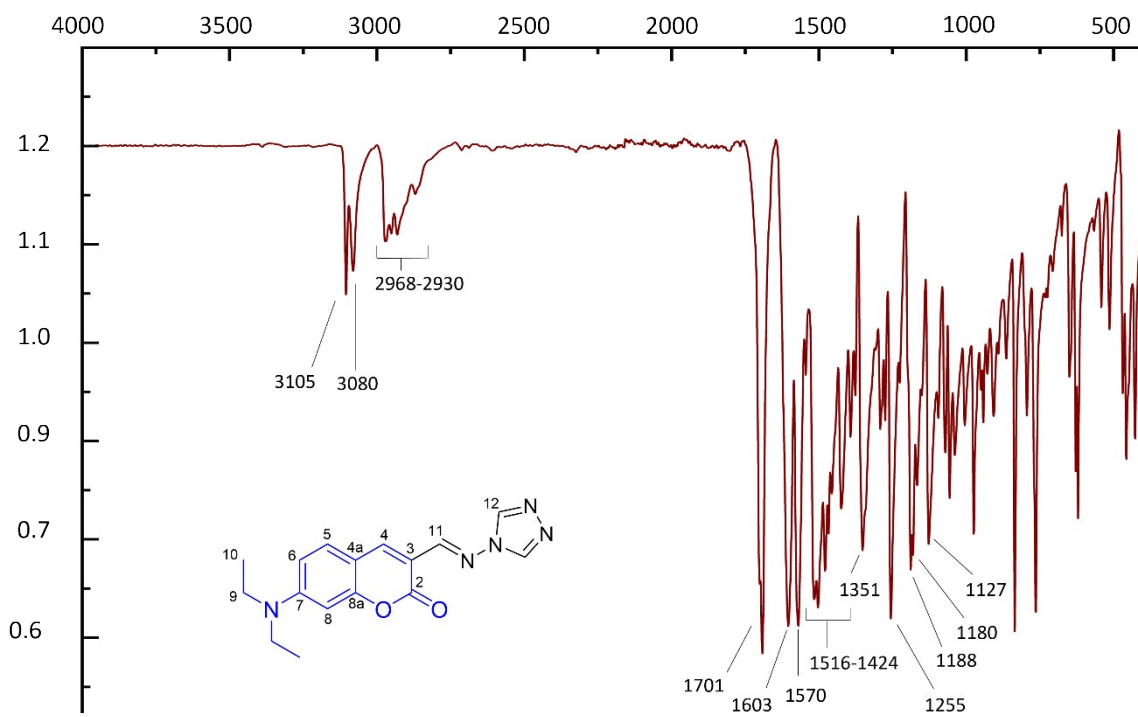

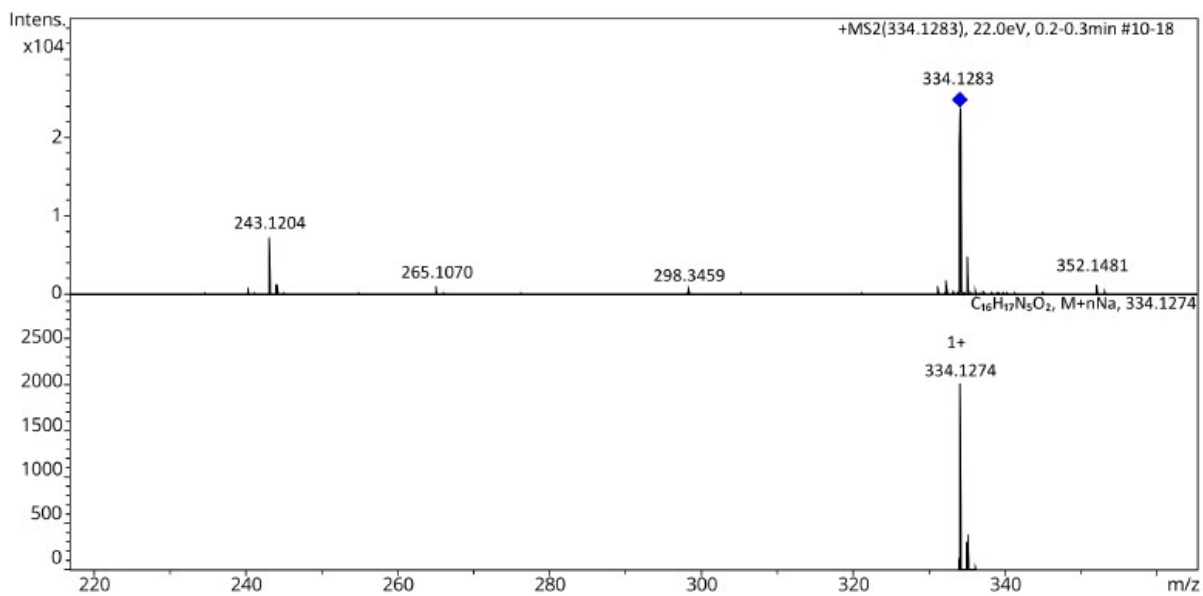

**Figure S6.** HRMS (ESI) of Compound 11.

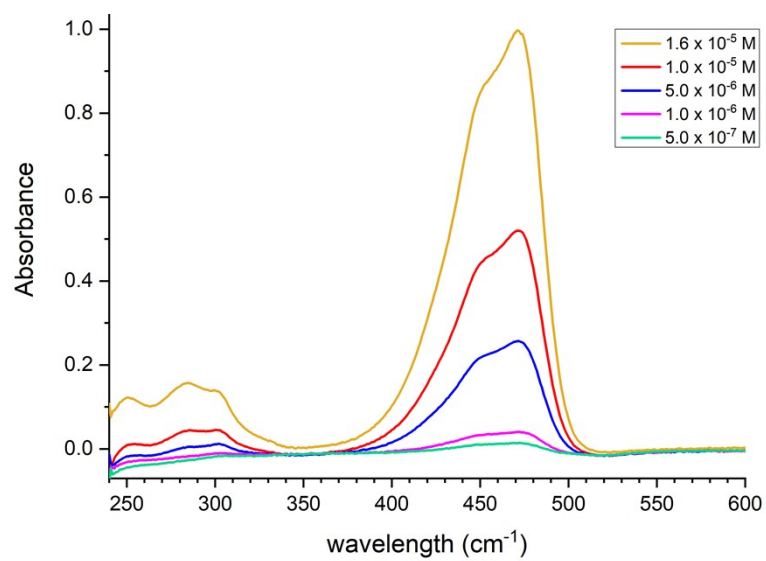

**Figure S7.** UV-Vis spectra of Compound 11.



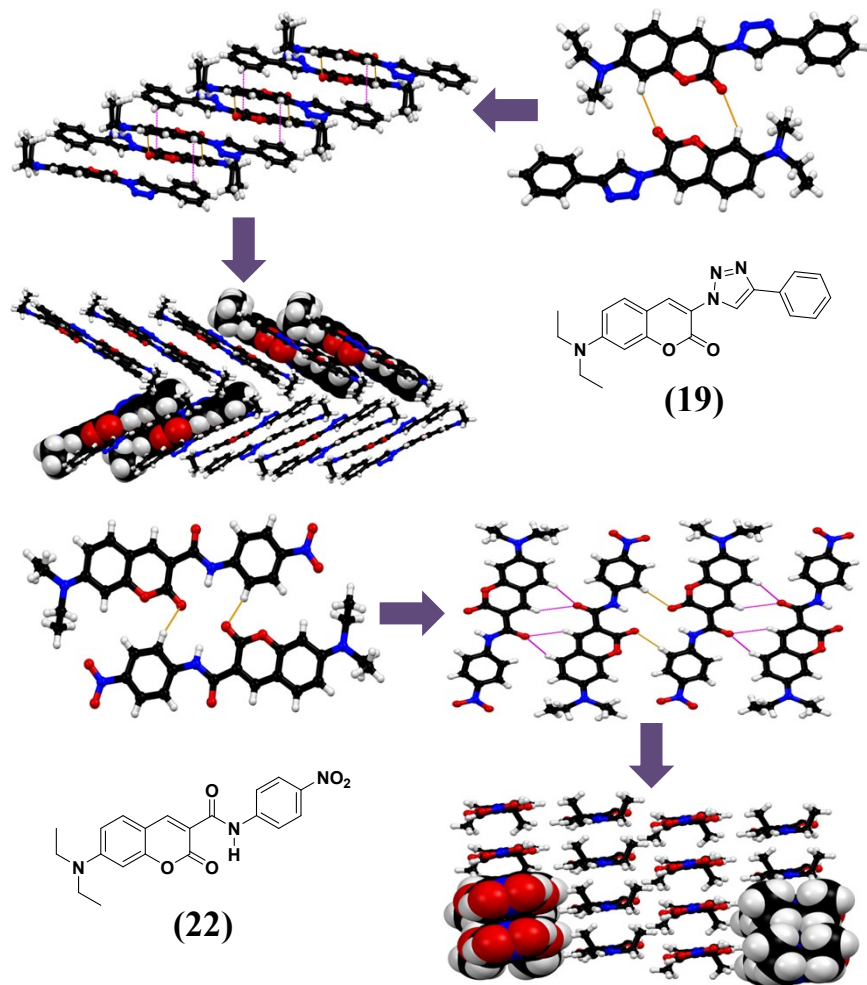

**Figure S8.** Selected examples (19 and 22) illustrate how the coumarin carbonyl group acts as a versatile handle in different supramolecular assemblies, demonstrating a cooperative effect with various substituents in a series of  $\pi$ -extended DAC-derivatives.

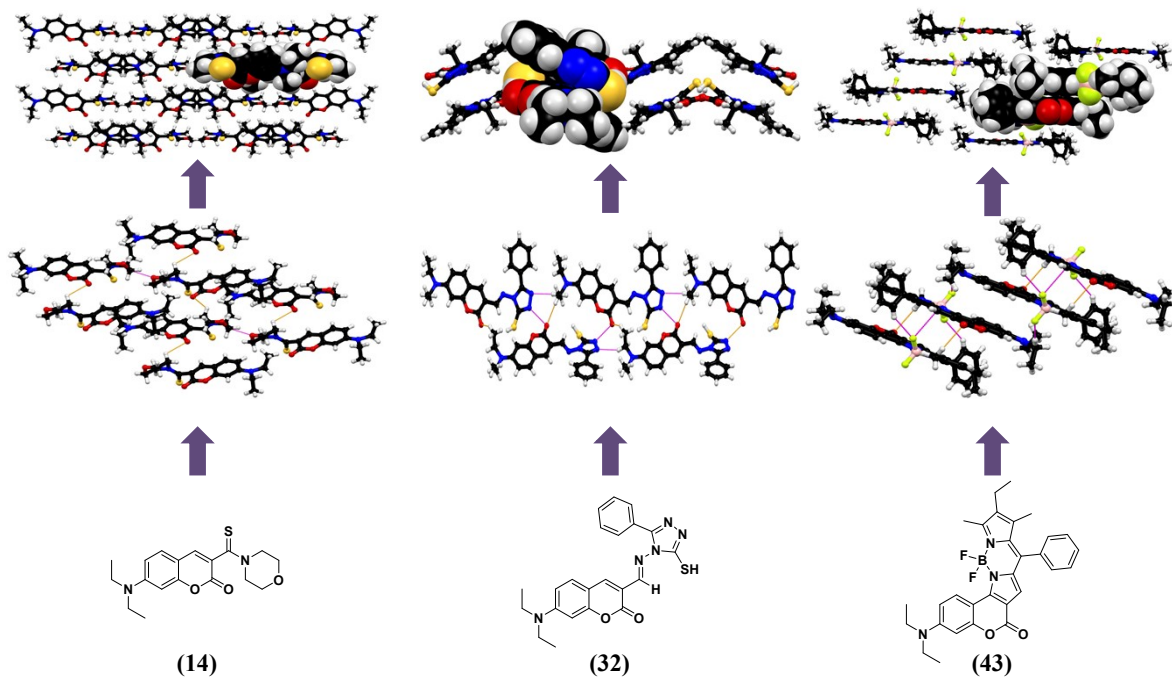

**Figure S9.** Selected examples where the structural features of substituents influence or override the interactions mediated by the coumarin carbonyl group.

**Table S1.** Crystallographic data of compound **11**.

Chemical formula:  $C_{16}H_{17}N_5O_2$   
Formula weight = 311.35  
T = 122 K  
Crystal system: Monoclinic      Space group: P21/c  
a = 14.3674(10) Å       $\alpha = 90^\circ$   
b = 10.3669(7) Å       $\beta = 103.365(7)^\circ$   
c = 10.6054(6) Å       $\gamma = 90^\circ$   
V = 1538.12(18) Å<sup>3</sup>      Z = 4  
D<sub>x</sub> = 1.344 g/cm<sup>3</sup>  
Radiation: Mo Ka (l = 0.71073 Å)  
 $\mu$ (Mo Ka) = 0.093 mm<sup>-1</sup> F(0 0 0) = 656.3  
Crystal size = 0.1053 · 0.2728 · 0.4735 mm<sup>3</sup>  
No. of reflections collected = 4035  
No. of independent reflections = 3267  
2 $\theta_{max}$  = 59.1° with Mo Ka  
Theta range for data collection: 3.9530 to 29.249°  
Index ranges: -18 ≤ h ≤ 19, -14 ≤ k ≤ 14, -14 ≤ l ≤ 14  
Completeness to theta = 25.2417° 99.8%  
Data/Restraints/Parameters = 3267/0/210  
Final R indices [I > 2σ(I)] R1 = 0.0422, wR2 = 0.1308  
R indices (all data): R1 = 0.0563, wR2 = 0.1474  
Goodness-of-fit on F<sup>2</sup> = 1.0953  
Largest diff. peak and hole (eÅ<sup>-3</sup>): 0.3835, -0.2745  
Refinement method: Full-matrix least-squares on F<sup>2</sup>  
Measurement: Oxford Diffraction Gemini Atlas diffractometer  
Data collection & cell refinement program: CrysAlisPro and CrysAlisRED  
Structure solving & refinement program: OLEX2  
CCDC: 2338583

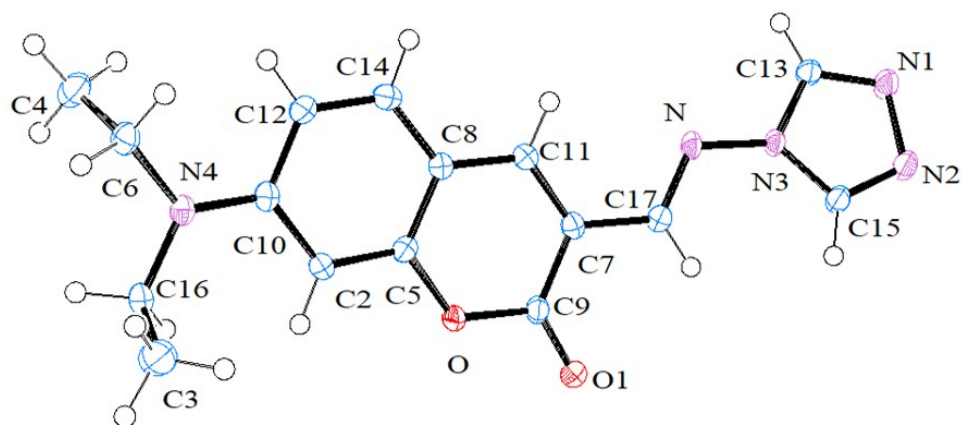

**Table S2.** Crystallographic data of DAC-derivatives retrieved from the crystallography open database. employed in the comparative study of DAC-derivatives as supramolecular structure-directing groups.

| ID      | DAC | Space group                                    | Z, Z' | a (Å)  | b (Å)  | c (Å)   | A (degrees) | β (degrees) | γ (degrees) | ρ (g/cm <sup>3</sup> ) | Crystallized from             | Reference                                                                         |
|---------|-----|------------------------------------------------|-------|--------|--------|---------|-------------|-------------|-------------|------------------------|-------------------------------|-----------------------------------------------------------------------------------|
| 1438103 | 1   | P-1                                            | 2, 1  | 6.8714 | 8.7065 | 10.0466 | 93.938      | 104.204     | 106.910     | 1.31                   | acetone                       | J. Mol. Struct. (2017), 1130, 914-921, doi:10.1016/j.molstruc.2016.10.080         |
| 2230615 | 2   | C 2/c                                          | 8, 1  | 13.33  | 13.33  | 12.60   | 92.28       | 92.28       | 34.21       | 1.21                   | dichloromethane/<br>petroleum | Acta Crystallographica Section E (2011), 67, o1713, doi:10.1107/S160053681102294X |
| 1553722 | 3   | P-1                                            | 2, 1  | 5.08   | 10.06  | 12.91   | 76.26       | 80.91       | 81.18       | 1.38                   | diethyl ether/ethyl acetate   | Materials Chemistry Frontiers (2018), 2, 910, doi:10.1039/C7QM00617A              |
| 2209698 | 3   | P 2 <sub>1</sub> /c                            | 4, 1  | 14.12  | 7.75   | 12.63   | 90.00       | 116.48      | 90.00       | 1.40                   | chloroform                    | Acta Crystallographica Section E (2006), 62, o3076, doi:10.1107/S160053680602321X |
| 2000551 | 4   | P-1                                            | 8, 4  | 14.39  | 18.84  | 10.19   | 90.15       | 98.72       | 85.49       | 1.39                   | cyclohexane                   | Acta Crystallographica Section C (1992), 48, 1859, doi:10.1107/S0108270192000623  |
| 2208873 | 5   | C 2/c                                          | 8, 1  | 9.42   | 9.42   | 22.09   | 106.93      | 106.93      | 47.06       | 1.27                   | ethanol                       | Acta Crystallographica Section E (2006), 62, o2072, doi:10.1107/S1600536806014899 |
| 7117321 | 6   | P-1                                            | 4, 2  | 9.21   | 12.62  | 12.93   | 94.78       | 109.99      | 105.42      | 1.37                   | ethanol                       | Chem. Commun. (2015), 51, 10435, doi:10.1039/C5cc03972J                           |
| 2229947 | 6   | P-1                                            | 4, 2  | 9.34   | 12.77  | 12.98   | 95.17       | 110.13      | 106.18      | 1.34                   | dichloromethane/<br>petroleum | Acta Crystallographica Section E (2011), 67, o1107, doi:10.1107/S1600536811010944 |
| 2206681 | 7   | P 2 <sub>1</sub> 2 <sub>1</sub> 2 <sub>1</sub> | 4, 1  | 6.60   | 14.36  | 14.55   | 90.00       | 90.00       | 90.00       | 1.25                   | ethanol                       | Acta Crystallographica Section E (2005), 61, o3041, doi:10.1107/S1600536805026607 |
| 1551651 | 8   | P-1                                            | 2, 1  | 7.43   | 9.09   | 11.25   | 105.51      | 93.33       | 111.01      | 1.40                   | chloroform/ methanol          | X-ray Structure Analysis Online (2014), 30, 21, doi:10.2116/xraystruct.30.21      |
| 1551552 | 9   | C 2/c                                          | 8, 1  | 11.65  | 11.65  | 13.14   | 115.59      | 115.59      | 69.24       | 1.33                   | chloroform                    | X-ray Structure Analysis Online (2018), 34, 3, doi:10.2116/xraystruct.34.3        |
| 8102531 | 10  | P 2 <sub>1</sub> /c                            | 4, 1  | 6.74   | 15.85  | 13.38   | 90.00       | 97.36       | 90.00       | 1.36                   | ethanol                       | Zeitschrift für Kristallographie - New Crystal Structures (2009), 224, 593        |
| 2338583 | 11  | P 2 <sub>1</sub> /c                            | 4, 1  | 14.36  | 10.36  | 10.60   | 90.00       | 103.16      | 90.00       | 1.34                   | dichloromethane               | <b>This work</b>                                                                  |
| 2243765 | 12  | P 2 <sub>1</sub> /c                            | 4, 1  | 13.72  | 13.05  | 8.56    | 90.00       | 95.52       | 90.00       | 1.31                   | acetone                       | Acta Crystallographica Section E (2021), 77, 331, doi:10.1107/S2056989021002218   |
| 7101415 | 13  | P 2 <sub>1</sub> /c                            | 8, 2  | 14.98  | 16.93  | 13.55   | 90.00       | 99.48       | 90.00       | 1.24                   | methanol                      | Chem. Commun., (2006), 3886, doi:10.1039/b609861d                                 |
| 4517186 | 14  | C c                                            | 4, 1  | 11.73  | 11.73  | 8.62    | 109.82      | 109.82      | 110.45      | 1.29                   | hexane/ethyl acetate          | ACS Chem. Neuroscience (2019), 10, 4847, doi:10.1021/acscemneuro.9b00554          |
| 2003249 | 15  | P-1                                            | 2, 1  | 8.96   | 11.14  | 8.92    | 95.14       | 104.50      | 86.74       | 1.36                   | ethanol                       | Acta Crystallographica Section C (1995), 51, 531, doi:10.1107/S0108270194003628   |

|         |    |                                                |        |       |       |       |        |        |        |      |                                              |                                                                                                             |
|---------|----|------------------------------------------------|--------|-------|-------|-------|--------|--------|--------|------|----------------------------------------------|-------------------------------------------------------------------------------------------------------------|
| 7054002 | 16 | P-1                                            | 2, 1   | 6.95  | 9.49  | 13.29 | 104.26 | 91.62  | 100.78 | 1.41 | dichloromethane                              | New J. Chem., (2014), 38, 260,<br>doi:10.1039/c3nj01176c                                                    |
| 2210108 | 17 | P 2 <sub>1</sub> 2 <sub>1</sub> 2 <sub>1</sub> | 4, 1   | 6.33  | 12.10 | 22.42 | 90.00  | 90.00  | 90.00  | 1.36 | chloroform                                   | Acta Crystallographica Section E (2006), 62,<br>o3826, doi:10.1107/S1600536806031138                        |
| 7117322 | 18 | P 2 <sub>1</sub> /c                            | 4, 1   | 13.16 | 6.94  | 21.08 | 90.00  | 109.63 | 90.00  | 1.29 | dichloromethane/<br>petroleum/methanol       | Chem.Comm., (2015), 51, 10435,<br>doi:10.1039/C5cc03972J                                                    |
| 7225474 | 19 | P 2 <sub>1</sub> /c                            | 4, 1   | 11.78 | 19.84 | 7.64  | 90.00  | 98.40  | 90.00  | 1.35 | ethyl acetate                                | CrystEngComm, (2016), 18, 5562,<br>doi:10.1039/C6CE01041E                                                   |
| 4127666 | 20 | P-1                                            | 4, 2   | 8.96  | 12.76 | 17.76 | 91.17  | 95.78  | 99.49  | 1.34 | acetonitrile                                 | J. Am. Chem. Soc., (2019), 141, 16344,<br>doi:10.1021/jacs.9b07175                                          |
| 7054004 | 21 | P-1                                            | 2, 1   | 6.90  | 7.38  | 19.54 | 81.88  | 82.06  | 65.32  | 1.35 | dichloromethane                              | New J. Chem., (2014), 38, 260,<br>doi:10.1039/c3nj01176c                                                    |
| 7054005 | 22 | P-1                                            | 2, 1   | 4.94  | 12.56 | 14.66 | 98.17  | 99.30  | 92.67  | 1.43 | dichloromethane                              | New J. Chem., (2014), 38, 260,<br>doi:10.1039/c3nj01176c                                                    |
| 4027127 | 23 | P-1                                            | 4, 2   | 9.42  | 12.51 | 16.57 | 88.22  | 75.86  | 80.76  | 1.37 | hexane/ethanol                               | J. Org. Chem., (2012), 77, 3475,<br>doi:10.1021/jo3002722                                                   |
| 7023327 | 24 | P 2 <sub>1</sub>                               | 2, 1   | 6.32  | 12.30 | 12.39 | 90.00  | 97.70  | 90.00  | 1.32 | chloroform/ acetonitrile                     | Dalton Trans., (2013), 42, 13078,<br>doi:10.1039/c3dt51182k                                                 |
| 7116652 | 25 | P 2 <sub>1</sub>                               | 2, 1   | 9.14  | 9.39  | 12.69 | 90.00  | 110.69 | 90.00  | 1.43 | dichloromethane/<br>petroleum/ diethyl ether | Chem.Comm., (2015), 51, 4443,<br>doi:10.1039/C5cc00295H                                                     |
| 4027128 | 26 | P 2 <sub>1</sub> /c                            | 4, 1   | 6.46  | 20.65 | 15.10 | 90.00  | 101.92 | 90.00  | 1.34 | hexane/ethanol                               | J. Org. Chem., (2012), 77, 3475,<br>doi:10.1021/jo3002722                                                   |
| 7017064 | 27 | P-1                                            | 2, 1   | 8.36  | 10.07 | 11.97 | 89.95  | 85.21  | 67.72  | 1.36 | dichloromethane/<br>ethanol                  | Dalton Trans., (2011), 40, 10815,<br>doi:10.1039/c1dt11123j                                                 |
| 8102459 | 28 | P 2 <sub>1</sub> /c                            | 4, 1   | 10.08 | 21.95 | 8.19  | 90.00  | 90.25  | 90.00  | 1.39 | ethanol                                      | Zeitschrift für Kristallographie - New Crystal<br>Structures (2009), 224, 413<br>doi:10.1524/ncrs.2009.0181 |
| 4027133 | 29 | P-1                                            | 2, 1   | 9.57  | 9.82  | 11.06 | 92.91  | 95.69  | 94.93  | 1.33 | hexane/ethanol                               | J. Org. Chem., (2012), 77, 3475,<br>doi:10.1021/jo3002722                                                   |
| 2231616 | 30 | P 2 <sub>1</sub> 2 <sub>1</sub> 2 <sub>1</sub> | 4, 1   | 7.94  | 12.60 | 20.23 | 90.00  | 90.00  | 90.00  | 1.44 | petroleum/ethyl acetate                      | Acta Crystallographica Section E (2011), 67,<br>o2344, doi:10.1107/S1600536811031916                        |
| 7054003 | 31 | P-1                                            | 2, 1   | 8.45  | 8.95  | 12.90 | 92.36  | 104.60 | 92.58  | 1.39 | dichloromethane                              | New J. Chem., (2014), 38, 260,<br>doi:10.1039/c3nj01176c                                                    |
| 7106102 | 32 | P 2 <sub>1</sub> /c                            | 4, 1   | 9.57  | 15.53 | 16.34 | 90.00  | 122.09 | 90.00  | 1.35 | chloroform/ethanol                           | Chem.Comm., (2011), 47, 3165,<br>doi:10.1039/c0cc05421f                                                     |
| 1558692 | 33 | P 2 <sub>1</sub> /c                            | 4, 1   | 9.52  | 19.76 | 10.80 | 90.00  | 103.76 | 90.00  | 1.31 | petroleum/ethyl acetate                      | Photochem. Photobiol. Sci., (2020), 19, 1211,<br>doi:10.1039/d0pp00140f                                     |
| 4325585 | 34 | P-1                                            | 1, 0.5 | 8.22  | 9.32  | 13.36 | 97.93  | 105.24 | 94.29  | 2.02 | ethanol/DMF                                  | Inorg. Chem., (2011), 50, 6543,<br>doi:10.1021/ic200181p                                                    |
| 7154613 | 35 | P-1                                            | 2, 1   | 6.96  | 10.23 | 14.78 | 102.73 | 97.40  | 94.66  | 1.34 | methanol                                     | Org. Biomol. Chem., (2015), 13, 8822,<br>doi:10.1039/c5ob01333j                                             |

|         |    |                     |      |       |       |       |        |        |        |      |                                  |                                                                                      |
|---------|----|---------------------|------|-------|-------|-------|--------|--------|--------|------|----------------------------------|--------------------------------------------------------------------------------------|
| 7119168 | 36 | P 2 <sub>1</sub> /n | 4, 1 | 10.91 | 7.82  | 22.43 | 90.00  | 97.30  | 90.00  | 1.38 | dichloromethane                  | Chem. Commun., (2016), 52, 7387<br>doi: 10.1039/C6CC02937J                           |
| 1547843 | 37 | P 2 <sub>1</sub> /c | 4, 1 | 8.35  | 12.42 | 20.68 | 90.00  | 97.92  | 90.00  | 1.35 | acetonitrile/<br>dichloromethane | Chem. Sci., (2018), 9, 502,<br>doi:10.1039/c7sc03765a                                |
| 4027132 | 38 | P-1                 | 2, 1 | 10.16 | 10.67 | 11.26 | 103.42 | 93.16  | 90.02  | 1.33 | hexane/ethanol                   | J. Org. Chem., (2012), 77, 3475,<br>doi:10.1021/jo3002722                            |
| 1558693 | 39 | P 2 <sub>1</sub> /c | 4, 1 | 9.68  | 10.45 | 12.13 | 112.87 | 91.88  | 103.59 | 1.35 | petroleum/ethyl acetate          | Photochem. Photobiol. Sci., (2020), 19, 1211,<br>doi:10.1039/d0pp00140f              |
| 1558694 | 40 | P-1                 | 2, 1 | 9.57  | 10.63 | 12.25 | 113.08 | 91.15  | 103.72 | 1.32 | petroleum/ethyl acetate          | Photochem. Photobiol. Sci., (2020), 19, 1211,<br>doi:10.1039/d0pp00140f              |
| 2237330 | 41 | P-1                 | 2, 1 | 9.65  | 10.25 | 11.12 | 87.21  | 86.36  | 84.35  | 1.33 | chloroform                       | Acta Crystallographica Section E (2013), 69,<br>o266, doi:10.1107/S1600536813001591  |
| 2239004 | 42 | P 2 <sub>1</sub> /n | 4, 1 | 15.51 | 8.47  | 16.88 | 90.00  | 97.73  | 90.00  | 1.28 | Methanol/<br>dichloromethane     | Acta Crystallographica Section E (2014), 70,<br>o176, doi:10.1107/S1600536814001123  |
| 7110104 | 43 | P-1                 | 2, 1 | 10.51 | 10.78 | 11.98 | 84.89  | 69.76  | 81.74  | 1.35 | dichloromethane/<br>petroleum    | Chem. Commun., (2013), 49, 11653,<br>doi:10.1039/c3cc46498a                          |
| 7023928 | 44 | P 2 <sub>1</sub> /c | 4, 1 | 14.32 | 9.66  | 18.97 | 90.00  | 91.51  | 90.00  | 1.23 | dichloromethane/<br>petroleum    | Dalton Trans., (2013), 42, 16302,<br>doi:10.1039/c3dt51953h                          |
| 7219031 | 45 | P 2 <sub>1</sub> /n | 4, 1 | 11.57 | 17.72 | 14.37 | 90.00  | 105.94 | 90.00  | 1.16 | petroleum/ethyl acetate          | RSC Adv., (2014),<br>doi:10.1039/C4RA13445A                                          |
| 2212633 | 46 | P 2 <sub>1</sub> /c | 4, 1 | 20.84 | 7.94  | 13.58 | 90.00  | 107.25 | 90.00  | 1.32 | acetone/toluene                  | Acta Crystallographica Section E (2007), 63,<br>o1140, doi:10.1107/S1600536807004771 |
| 4028361 | 47 | P-1                 | 2, 1 | 11.25 | 11.98 | 12.34 | 81.87  | 76.57  | 63.04  | 1.21 | Ethanol/water                    | J. Org. Chem., (2013), 78, 6121,<br>doi:10.1021/jo400783x                            |
| 1544743 | 48 | P 2 <sub>1</sub> /c | 4, 1 | 11.48 | 20.46 | 11.67 | 90.00  | 111.06 | 90.00  | 1.73 | dichloromethane/<br>hexane       | Chem. Sci., (2017), 8, 2352,<br>doi:10.1039/c6sc03775e                               |
| 7229754 | 49 | P 2 <sub>1</sub> /n | 4, 1 | 14.06 | 13.27 | 15.33 | 90.00  | 104.96 | 90.00  | 1.27 | toluene                          | Phys. Chem. Chem. Phys., (2018), 20, 6060,<br>doi:10.1039/c7cp07274k                 |
| 7229755 | 50 | P-1                 | 2, 1 | 9.83  | 11.70 | 12.98 | 113.25 | 93.22  | 93.12  | 1.25 | toluene                          | Phys. Chem. Chem. Phys., (2018), 20, 6060,<br>doi:10.1039/c7cp07274k                 |

**Table S3.** Unit cells retrieved from the Crystallography Open Database, employed in the comparative study of DAC-derivatives as supramolecular synthons. The solvent-accessible surface area,  $A_{SASA}$  ( $\text{\AA}^2$ ), is provided for the molecular unit of all systems **01-50**, measured with a 1.4  $\text{\AA}$  radius probe. The type of interactions, the coumarin alignment, the distances between the planes of the compounds that present  $\pi$ -stacking and the stacking modes are also provided.

| Entry | Structure                                                                           | ID      | $A_{SASA}$ ( $\text{\AA}^2$ ) | Interaction                                                                                        | Structure-directing functional group                                                                                                     | Non-directing functional group | Coumarin alignment | $\pi$ -stacking | Stacking-modes |
|-------|-------------------------------------------------------------------------------------|---------|-------------------------------|----------------------------------------------------------------------------------------------------|------------------------------------------------------------------------------------------------------------------------------------------|--------------------------------|--------------------|-----------------|----------------|
| 1     | 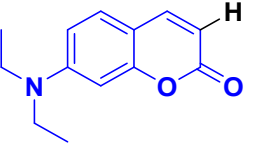   | 1438103 | 421.9                         | C-H...O<br>Coumarin...Coumarin<br>(Ring)<br>C-H...O<br>Ethyl...Coumarin<br>(Ring)                  | H-bonding:<br>C-H...O<br>Aromatic...Carbonyl<br>C-H...O<br>Ethyl...Carbonyl<br>$\pi$ -stacking:<br>Face to face                          | ****                           | Anti-parallel      | Yes<br>(3.030)  | 1 (2D)         |
| 2     |    | 2230615 | 450.4                         | C-H...O<br>Coumarin...Coumarin<br>C-H...O<br>Ethyl...Coumarin<br>C-H...O<br>Coumarin...Substituent | H-bonding:<br>C-H...O<br>Aromatic...Carbonyl<br>C-H...O<br>Ethyl...Carbonyl<br>C-H...O<br>Ethyl...Carbonyl<br>$\pi$ -stacking:<br>Offset | ****                           | Anti-parallel      | Yes<br>(3.429)  | 2 (2D)         |
| 3     |  | 2209698 | 453.5                         | C-H...O<br>Coumarin...Coumarin<br>C-H...O<br>Ethyl...Coumarin<br>C-H...O<br>Coumarin...Substituent | H-bonding:<br>C-H...O<br>Aromatic...Carbonyl<br>C-H...O<br>Ethyl...Carbonyl<br>C-H...O<br>Ethyl...Carbonyl<br>$\pi$ -stacking:<br>Offset | ****                           | Anti-parallel      | Yes<br>(3.441)  | 2 (2D)         |

|   |                                                                                     |         |       |                                                                                                                                                            |                                                                                                                                                                                                                       |      |               |                             |        |
|---|-------------------------------------------------------------------------------------|---------|-------|------------------------------------------------------------------------------------------------------------------------------------------------------------|-----------------------------------------------------------------------------------------------------------------------------------------------------------------------------------------------------------------------|------|---------------|-----------------------------|--------|
| 3 | 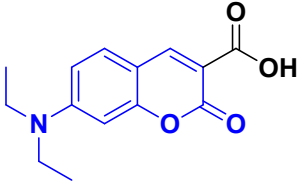   | 1553722 | 456.6 | <p>C-H...O<br/>Coumarin...Coumarin<br/>(Ring)</p> <p>C-H...O<br/>Ethyl...Coumarin</p>                                                                      | <p>H-bonding:<br/>C-H...O<br/>Aromatic...Carbonyl</p> <p>C-H...O<br/>Ethyl...Carbonyl</p> <p><math>\pi</math>-stacking:<br/>Offset</p>                                                                                | **** | Anti-parallel | Yes<br>(3.644)              | 2 (1D) |
| 4 |    | 2000551 | 469.3 | <p>C-H...O<br/>Ethyl...Coumarin<br/>(Ring)</p>                                                                                                             | <p>H-bonding:<br/>C-H...O<br/>Ethyl...Carbonyl</p> <p><math>\pi</math>-stacking:<br/>Face to face</p>                                                                                                                 | **** | Anti-parallel | Yes<br>(3.616)<br>Two Pairs | 2 (1D) |
| 5 |    | 2208873 | 475.0 | <p>C-H...O<br/>Coumarin...Coumarin</p> <p>C-H...O<br/>Ethyl...Coumarin</p> <p>C-H...O<br/>Ethyl...Substituent</p> <p>C=O...C=O<br/>Coumarin...Coumarin</p> | <p>H-bonding:<br/>C-H...O<br/>Aromatic...Carbonyl</p> <p>C-H...O<br/>Ethyl...Carbonyl</p> <p><math>\pi</math>-stacking:<br/>Offset</p> <p>Carbonyl...Carbonyl<br/>(n <math>\rightarrow</math> <math>\pi^*</math>)</p> | **** | Anti-parallel | Yes<br>(3.450)              | 2 (2D) |
| 6 |  | 7117321 | 484.1 | <p>C-H...O<br/>Ethyl...Coumarin<br/>(Chain)</p> <p>N-H...O<br/>Substituent...Substituent<br/>(Ring)</p>                                                    | <p>H-bonding:<br/>C-H...O<br/>Ethyl...Carbonyl</p> <p>N-H...O<br/>Hydrazide...Carbonyl</p> <p><math>\pi</math>-stacking:<br/>Offset</p>                                                                               | **** | Anti-parallel | Yes<br>(4.050)              | 1 (2D) |



|   |  |         |       |                                                                                                                                                                          |                                                                                                                                                                                                      |      |               |                         |        |
|---|--|---------|-------|--------------------------------------------------------------------------------------------------------------------------------------------------------------------------|------------------------------------------------------------------------------------------------------------------------------------------------------------------------------------------------------|------|---------------|-------------------------|--------|
| 6 |  | 2229947 | 485.2 | <p>C-H...O<br/>Coumarin...Coumarin</p> <p>C-H...O<br/>Ethyl...Coumarin</p> <p>N-H...O<br/>Substituent...Substituent</p>                                                  | <p>H-bonding:<br/>C-H...O<br/>Aromatic...Carbonyl</p> <p>C-H...O<br/>Ethyl...Carbonyl</p> <p>N-H...O<br/>Hydrazide...Carbonyl</p> <p><math>\pi</math>-stacking:<br/>Offset</p>                       | **** | Anti-parallel | Yes<br>(3.347)          | 1 (2D) |
| 7 |  | 2206681 | 485.6 | <p>C-H...O<br/>Coumarin...Coumarin<br/>(Ring)</p> <p>C-H...O<br/>Ethyl...Coumarin</p> <p>C-H...O<br/>Substituent...Coumarin</p>                                          | <p>H-bonding:<br/>C-H...O<br/>Aromatic...Carbonyl</p> <p>C-H...O<br/>Ethyl...Carbonyl</p> <p>C-H...O<br/>Methyl...Carbonyl</p> <p><math>\pi</math>-stacking:<br/>Edge to face</p>                    | **** | Anti-parallel | Yes<br>(3.415)<br>Pairs | 2 (1D) |
| 8 |  | 1551651 | 497.8 | <p>C-H...O<br/>Coumarin...Coumarin</p> <p>C-H...O<br/>Ethyl...Coumarin</p> <p>C-H...O<br/>Coumarin...Substituent<br/>(Ring)</p> <p>C=O...C=O<br/>Coumarin...Coumarin</p> | <p>H-bonding:<br/>C-H...O<br/>Ethyl...Carbonyl</p> <p>C-H...O<br/>Ethyl...Oxazole</p> <p><math>\pi</math>-stacking:<br/>Offset</p> <p>Carbonyl...Carbonyl<br/>(<math>n \rightarrow \pi^*</math>)</p> | **** | Anti-parallel | Yes<br>(3.810)<br>Pairs | 1 (2D) |
| 9 |  | 1551552 | 502.4 | <p>C-H...O<br/>Coumarin...Coumarin<br/>(Ring)</p> <p>C-H...O/N<br/>Ethyl...Substituent</p>                                                                               | <p>H-bonding:<br/>C-H...O<br/>Aromatic...Carbonyl</p> <p>C-H...O/N<br/>Ethyl...Oxazole</p> <p><math>\pi</math>-stacking:<br/>Offset<br/>Face to edge</p>                                             | **** | Anti-parallel | Yes<br>(3.394)          | 2 (1D) |

|    |  |         |       |                                                                                                                                                   |                                                                                                                                                                                                                  |      |               |                |        |
|----|--|---------|-------|---------------------------------------------------------------------------------------------------------------------------------------------------|------------------------------------------------------------------------------------------------------------------------------------------------------------------------------------------------------------------|------|---------------|----------------|--------|
| 10 |  | 8102531 | 528.5 | <p>C-H...O<br/>Coumarin...Coumarin<br/>(Ring)</p> <p>C-H...O<br/>Ethyl...Coumarin</p> <p>C-H...O<br/>Ethyl/Substituent...Substituent</p>          | <p>H-bonding:<br/>C-H...O<br/>Aromatic...Carbonyl</p> <p>C-H...O<br/>Ethyl...Carbonyl</p> <p>C-H...O<br/>Ethyl...O-Et</p> <p><math>\pi</math>-stacking:<br/>Offset</p>                                           | **** | Anti-parallel | Yes<br>(3.365) | 2 (2D) |
| 11 |  | 2338583 | 546.5 | <p>C-H...O<br/>Coumarin...Coumarin<br/>(Ring)</p> <p>C-H...O<br/>Substituent...Coumarin</p> <p>C-H...N<br/>Coumarin/Substituent...Substituent</p> | <p>H-bonding:<br/>C-H...O<br/>Aromatic...Carbonyl</p> <p>C-H...O<br/>Imine...Carbonyl</p> <p>C-H...N<br/>Ethyl...Triazole<br/>Triazole...Imine</p> <p><math>\pi</math>-stacking:<br/>Offset<br/>Face to edge</p> | **** | Anti-parallel | Yes<br>(3.456) | 2 (2D) |
| 12 |  | 2243765 | 549.7 | <p>C-H...O<br/>Coumarin...Coumarin</p> <p>C-H...O<br/>Ethyl...Coumarin</p> <p>C-H...O<br/>Substituent...Substituent<br/>(Ring)</p>                | <p>H-bonding:<br/>C-H...O<br/>Aromatic...Carbonyl</p> <p>C-H...O<br/>Ethyl...Carbonyl</p> <p>C-H...O<br/>Ethyl...Carbonyl</p> <p><math>\pi</math>-stacking:<br/>Offset</p>                                       | **** | Anti-parallel | Yes<br>(3.356) | 2 (1D) |

|    |                                                                                     |         |       |                                                                                                                                                |                                                                                                                                |                                                        |               |                         |        |
|----|-------------------------------------------------------------------------------------|---------|-------|------------------------------------------------------------------------------------------------------------------------------------------------|--------------------------------------------------------------------------------------------------------------------------------|--------------------------------------------------------|---------------|-------------------------|--------|
| 13 | 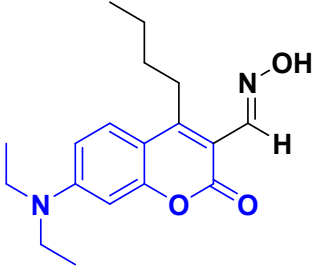   | 7101415 | 557.5 | <p>C-H...O<br/>Ethyl...Coumarin</p> <p>O-H...O<br/>Substituent...Coumarin</p> <p>C-H...O<br/>Ethyl...Substituent</p>                           | <p>H-bonding:<br/>C-H...O<br/>Ethyl...Carbonyl</p> <p>C-H...O<br/>Ethyl...O-H</p> <p><math>\pi</math>-stacking:<br/>Offset</p> | ****                                                   | Anti-parallel | Yes<br>(3.386)<br>Pairs | 2 (2D) |
| 14 |    | 4517186 | 567.1 | <p>C-H...O<br/>Substituent...Coumarin<br/>(Ring)</p> <p>C-H...O<br/>Substituent...Substituent</p> <p>C-H...S<br/>Substituent...Substituent</p> | <p>H-bonding:<br/>C-H...O<br/>Morpholine...Morpholine</p> <p>C-H...S<br/>Morpholine...C=S</p>                                  | <p>H-bonding:<br/>C-H...O<br/>Aliphatic...Carbonyl</p> | Parallel      | No                      | ****   |
| 15 |  | 2003249 | 570.6 | <p>C-H...O<br/>Ethyl...Coumarin<br/>(Chain)</p>                                                                                                | <p>H-bonding:<br/>C-H...O<br/>Ethyl...Carbonyl</p> <p><math>\pi</math>-stacking:<br/>Offset</p>                                | ****                                                   | Anti-parallel | Yes<br>(3.388)          | 1 (1D) |

|    |                                                                                     |         |       |                                                                                                                                            |                                                                                                                                                                               |      |               |                                            |        |
|----|-------------------------------------------------------------------------------------|---------|-------|--------------------------------------------------------------------------------------------------------------------------------------------|-------------------------------------------------------------------------------------------------------------------------------------------------------------------------------|------|---------------|--------------------------------------------|--------|
| 16 | 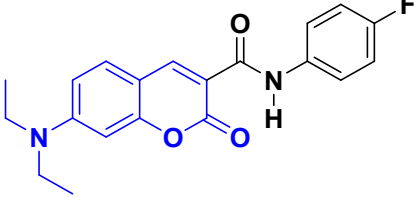   | 7054002 | 586.8 | <p>C-H...O<br/>Coumarin...Coumarin</p> <p>C-H...O<br/>Ethyl...Coumarin</p> <p>C-H...O<br/>Ethyl/Substituent...Substituent</p>              | <p>H-bonding:<br/>C-H...O<br/>Aromatic...Carbonyl</p> <p>C-H...O<br/>Ethyl...Carbonyl</p> <p>C-H...O<br/>Ethyl...Carbonyl</p> <p><math>\pi</math>-stacking:<br/>Offset</p>    | **** | Anti-parallel | Yes<br>(3.463)<br>Pairs                    | 1 (2D) |
| 17 |    | 2210108 | 597.1 | <p>C-H...O<br/>Coumarin...Coumarin<br/>(Chain)</p> <p>C-H...O<br/>Ethyl...Substituent</p>                                                  | <p>H-bonding:<br/>C-H...O<br/>Aromatic...Carbonyl</p> <p>C-H...O<br/>Ethyl...Carbonyl<br/>Ethyl...O-CH<sub>3</sub></p> <p><math>\pi</math>-stacking:<br/>Offset</p>           | **** | Parallel      | Yes<br>(3.194)<br>Coumarin-<br>Substituent | 2 (2D) |
| 18 |  | 7117322 | 600.7 | <p>C-H...O<br/>Coumarin...Coumarin<br/>(Ring)</p> <p>C-H...O<br/>Ethyl...Coumarin</p> <p>C-H...O<br/>Coumarin...Substituent<br/>(Ring)</p> | <p>H-bonding:<br/>C-H...O<br/>Aromatic...Carbonyl</p> <p>C-H...O<br/>Ethyl...Carbonyl</p> <p>C-H...O<br/>Aromatic...Carbonyl</p> <p><math>\pi</math>-stacking:<br/>Offset</p> | **** | Anti-parallel | Yes<br>(3.425)<br>Coumarin-<br>Substituent | 1 (2D) |

|    |                                                                                     |         |       |                                                                                                                                    |                                                                                                                                                   |      |               |                                        |        |
|----|-------------------------------------------------------------------------------------|---------|-------|------------------------------------------------------------------------------------------------------------------------------------|---------------------------------------------------------------------------------------------------------------------------------------------------|------|---------------|----------------------------------------|--------|
| 19 | 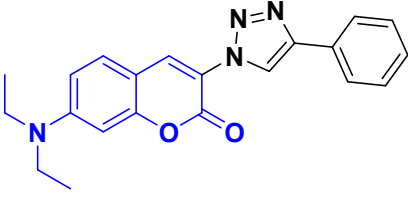   | 7225474 | 603.1 | <p>C-H...O<br/>Coumarin...Coumarin<br/>(Ring)</p> <p>O...π<br/>Coumarin...Substituent</p>                                          | <p>H-bonding:<br/>C-H...O<br/>Aromatic...Carbonyl</p> <p>O...π<br/>Carbonyl...phenyl</p> <p>π-stacking:<br/>Offset</p>                            | **** | Anti-parallel | Yes<br>(3.517)<br>Coumarin-Substituent | 2 (2D) |
| 20 |    | 4127666 | 606.7 | <p>C-H...O<br/>Ethyl...Coumarin<br/>(Ring)</p> <p>O...H-O<br/>Coumarin...Substituent</p> <p>C-H...O<br/>Coumarin...Substituent</p> | <p>H-bonding:<br/>C-H...O<br/>Ethyl...Carbonyl</p> <p>O...H-O<br/>Carbonyl...H-O</p> <p>C-H...O<br/>Ethyl...O-H</p> <p>π-stacking:<br/>Offset</p> | **** | Anti-parallel | Yes<br>(3.663)<br>Pairs                | 2 (1D) |
| 21 |  | 7054004 | 611.8 | <p>C-H...O<br/>Coumarin...Coumarin<br/>(Ring)</p> <p>C-H...O<br/>Substituent...Substituent<br/>(Chain)</p>                         | <p>H-bonding:<br/>C-H...O<br/>Aromatic...Carbonyl</p> <p>C-H...O<br/>Aromatic...Carbonyl</p> <p>π-stacking:<br/>Offset</p>                        | **** | Anti-parallel | Yes<br>(3.497)<br>Pairs                | 1 (2D) |

|    |                                                                                     |         |       |                                                                                                                                          |                                                                                                                                                                               |      |               |                                            |        |
|----|-------------------------------------------------------------------------------------|---------|-------|------------------------------------------------------------------------------------------------------------------------------------------|-------------------------------------------------------------------------------------------------------------------------------------------------------------------------------|------|---------------|--------------------------------------------|--------|
| 22 | 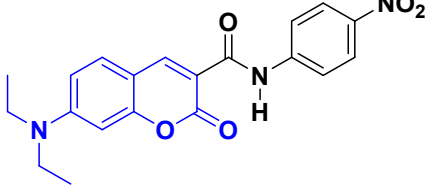   | 7054005 | 614.9 | <p>C-H...O<br/>Substituent...Coumarin</p> <p>N-H...O<br/>Substituent...Coumarin</p> <p>C-H...O<br/>Coumarin...Substituent<br/>(Ring)</p> | <p>H-bonding:<br/>C-H...O<br/>Aromatic...Carbonyl</p> <p>N-H...O<br/>Amide...Carbonyl</p> <p>C-H...O<br/>Aromatic...Carbonyl</p> <p><math>\pi</math>-stacking:<br/>Offset</p> | **** | Anti-parallel | Yes<br>(3.371)<br>Pairs                    | 1 (2D) |
| 23 |    | 4027127 | 618.2 | <p>C-H...O<br/>Coumarin...Coumarin</p> <p>C-H...O<br/>Ethyl...Coumarin</p> <p>C-H...N<br/>Ethyl...Substituent</p>                        | <p>H-bonding:<br/>C-H...O<br/>Aromatic...Carbonyl</p> <p>C-H...O<br/>Aromatic...Carbonyl</p> <p>C-H...N<br/>Ethyl...N</p> <p><math>\pi</math>-stacking:<br/>Offset</p>        | **** | Anti-parallel | Yes<br>(3.352)                             | 1 (2D) |
| 24 |  | 7023327 | 635.5 | <p>C-H...O<br/>Coumarin...Coumarin</p> <p>C-H...O<br/>Coumarin...Substituent<br/>(Ring)</p> <p>N-H...O<br/>Substituent...Substituent</p> | <p>H-bonding:<br/>C-H...O<br/>Aromatic...Carbonyl</p> <p>C-H...O<br/>Aromatic...Carbonyl</p> <p><math>\pi</math>-stacking:<br/>Offset</p>                                     | **** | Anti-parallel | Yes<br>(3.396)<br>Coumarin-<br>Substituent | 2 (1D) |

|    |                                                                                     |         |       |                                                                                                                                                                                                                                 |                                                                                                                                                                                                       |                                                                                           |               |                                            |        |
|----|-------------------------------------------------------------------------------------|---------|-------|---------------------------------------------------------------------------------------------------------------------------------------------------------------------------------------------------------------------------------|-------------------------------------------------------------------------------------------------------------------------------------------------------------------------------------------------------|-------------------------------------------------------------------------------------------|---------------|--------------------------------------------|--------|
| 25 | 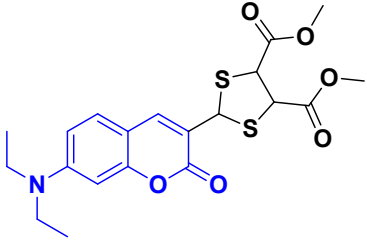   | 7116652 | 639.6 | <p>C-H...O<br/>Coumarin...Coumarin</p> <p>C-H...O<br/>Ethyl...Coumarin</p> <p>C-H...O<br/>Substituent...Substituent</p> <p>C-H...O<br/>Coumarin...Substituent</p> <p><math>\pi</math>-stacking<br/>(C-H...<math>\pi</math>)</p> | <p>H-bonding:<br/>C-H...O<br/>S-C-H... Carbonyl</p> <p>C-H...O<br/>Aromatic...Carbonyl</p> <p><math>\pi</math>-stacking:<br/>Substituent...Coumarin<br/>(C-H...<math>\pi</math>)<br/>Edge to face</p> | <p>H-bonding:<br/>C-H...O<br/>Aromatic...Carbonyl</p> <p>C-H...O<br/>Ethyl...Carbonyl</p> | No            | ****                                       | ****   |
| 26 |    | 4027128 | 641.6 | <p>C-H...O<br/>Substituent...Coumarin<br/>(Ring)</p> <p>C-H...O<br/>Substituent...Coumarin</p>                                                                                                                                  | <p>H-bonding:<br/>C-H...O<br/>7-azaindazole...Carbonyl</p> <p>C-H...O<br/>Phenyl...Carbonyl</p> <p><math>\pi</math>-stacking:<br/>Offset</p>                                                          | ****                                                                                      | Anti-parallel | Yes<br>(3.995)<br>Pairs                    | 2 (1D) |
| 27 |  | 7017064 | 642.0 | <p>C-H...O<br/>Substituent-Coumarin<br/>(Ring)</p> <p>N-H...O<br/>Substituent-Coumarin<br/>(Ring)</p> <p>C-H...O<br/>Ethyl...Substituent</p>                                                                                    | <p>H-bonding:<br/>C-H...O<br/>Aromatic...Carbonyl<br/>Imine...Carbonyl</p> <p>N-H...O<br/>Amide...Carbonyl</p> <p>C-H...O<br/>Ethyl...Carbonyl</p> <p><math>\pi</math>-stacking:<br/>Offset</p>       | ****                                                                                      | Anti-parallel | Yes<br>(3.386)<br>Coumarin-<br>Substituent | 1 (2D) |

|    |                                                                                     |         |       |                                                                                                                                                            |                                                                                                                                                                                                                        |      |               |                |        |
|----|-------------------------------------------------------------------------------------|---------|-------|------------------------------------------------------------------------------------------------------------------------------------------------------------|------------------------------------------------------------------------------------------------------------------------------------------------------------------------------------------------------------------------|------|---------------|----------------|--------|
| 28 | 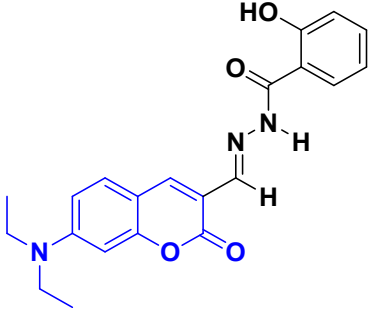   | 8102459 | 642.6 | <p>N-H/C-H...O<br/>Substituent...Coumarin<br/>(Ring)</p> <p>C-H...O<br/>Coumarin...Substituent<br/>(Ring)</p> <p>C-H...N<br/>Substituent...Substituent</p> | <p>H-bonding:<br/>N-H/C-H...O<br/>Imine...Carbonyl<br/>Amide...Carbonyl</p> <p>C-H...O<br/>Aromatic...Carbonyl<br/>Aromatic...O-H</p> <p>C-H...N<br/>Aromatic...Imine</p> <p><math>\pi</math>-stacking:<br/>Offset</p> | **** | Anti-parallel | Yes<br>(3.306) | 2 (2D) |
| 29 |    | 4027133 | 642.7 | <p>C-H...O<br/>Substituent...Coumarin<br/>(Ring)</p> <p>C-H...O<br/>Ethyl...Coumarin</p>                                                                   | <p>H-bonding:<br/>C-H...O<br/>Aromatic...Carbonyl</p> <p>C-H...O<br/>Ethyl...Carbonyl</p> <p><math>\pi</math>-stacking:<br/>Offset</p>                                                                                 | **** | Anti-parallel | Yes<br>(3.395) | 1 (2D) |
| 30 |  | 2231616 | 651.7 | <p>C-H...O<br/>Substituent...Coumarin</p> <p>C-H...Cl<br/>Ethyl...Substituent</p>                                                                          | <p>H-bonding:<br/>C-H...O<br/>Aromatic...Carbonyl</p> <p>C-H...Cl<br/>Ethyl...Cl</p> <p><math>\pi</math>-stacking:<br/>Offset</p>                                                                                      | **** | Anti-parallel | Yes<br>(3.753) | 2 (2D) |



|    |  |         |       |                                                                                                                                       |                                                                                                                                                                                  |      |               |                         |        |
|----|--|---------|-------|---------------------------------------------------------------------------------------------------------------------------------------|----------------------------------------------------------------------------------------------------------------------------------------------------------------------------------|------|---------------|-------------------------|--------|
| 31 |  | 7054003 | 654.5 | <p>C-H...O<br/>Coumarin...Coumarin</p> <p>C-H...O<br/>Substituent...Coumarin</p> <p>C-H...O<br/>Coumarin...Substituent<br/>(Ring)</p> | <p>H-bonding:<br/>C-H...O<br/>Aromatic...Carbonyl</p> <p>C-H...O<br/>Aromatic...Carbonyl</p> <p>C-H...O<br/>Aromatic...Carbonyl</p> <p><math>\pi</math>-stacking:<br/>Offset</p> | **** | Anti-parallel | Yes<br>(3.483)<br>Pairs | 1 (2D) |
| 32 |  | 7106102 | 654.7 | <p>C-H...O<br/>Ethyl...Coumarin</p>                                                                                                   | <p>H-bonding:<br/>C-H...O<br/>Ethyl...Carbonyl</p> <p><math>\pi</math>-stacking:<br/>Offset</p>                                                                                  | **** | No            | Yes<br>(3.673)          | 2 (2D) |
| 33 |  | 1558692 | 656.2 | <p>C-H...O<br/>Substituent...Coumarin<br/>(Ring)</p>                                                                                  | <p>H-bonding:<br/>C-H...O<br/>Triazole...Carbonyl</p> <p><math>\pi</math>-stacking:<br/>Offset</p>                                                                               | **** | Anti-parallel | Yes<br>(3.373)          | 2 (1D) |

|    |                                                                                     |         |       |                                                                                                                                          |                                                                                                                                                                                                                                             |      |                                                   |                         |        |
|----|-------------------------------------------------------------------------------------|---------|-------|------------------------------------------------------------------------------------------------------------------------------------------|---------------------------------------------------------------------------------------------------------------------------------------------------------------------------------------------------------------------------------------------|------|---------------------------------------------------|-------------------------|--------|
| 34 | 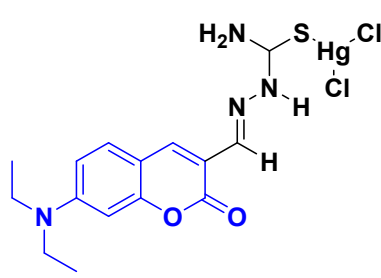   | 4325585 | 658.6 | <p>N-H...O<br/>Substituent...Coumarin<br/>(Ring)</p> <p>N-H...Cl<br/>Substituent...Substituent</p>                                       | <p>H-bonding:<br/>N-H...O<br/>N-H... Carbonyl</p> <p>N-H...Cl<br/>Hydrazone...Cl</p> <p><math>\pi</math>-stacking:<br/>Offset</p>                                                                                                           | **** | Anti-parallel                                     | Yes<br>(3.736)<br>Pairs | 1 (2D) |
| 35 |    | 7154613 | 664.0 | <p>C-H...O<br/>Substituent...Coumarin<br/>(Ring)</p> <p>N-H...O<br/>Substituent...Coumarin</p> <p>C-H...O<br/>Coumarin...Substituent</p> | <p>H-bonding:<br/>C-H...O<br/>Imine... Carbonyl</p> <p>N-H...O<br/>N-H... Carbonyl</p> <p>C-H...O<br/>Aromatic...O-CH<sub>3</sub></p> <p><math>\pi</math>-stacking:<br/>Offset</p>                                                          | **** | Anti-parallel                                     | Yes<br>(3.141)          | 1 (2D) |
| 36 |  | 7119168 | 683.7 | <p>C-H...O<br/>Substituent...Coumarin</p> <p>N-H...O<br/>Substituent...Coumarin</p> <p>C-H...O/N<br/>Ethyl...Substituent</p>             | <p>H-bonding:<br/>C-H...O<br/>Imine... Carbonyl<br/>Aromatic... Carbonyl</p> <p>N-H...O<br/>N-H... Carbonyl</p> <p>C-H...O/N<br/>Ethyl... Carbonyl<br/>Ethyl... Hydrazide</p> <p><math>\pi</math>-stacking:<br/>Offset<br/>Face to edge</p> | **** | Anti-parallel<br>(Total:<br>stackable<br>surface) | Yes<br>(3.576)<br>Pairs | 2 (1D) |

|    |                                                                                     |         |       |                                                                                                                                 |                                                                                                                                                                                  |      |                         |                         |        |
|----|-------------------------------------------------------------------------------------|---------|-------|---------------------------------------------------------------------------------------------------------------------------------|----------------------------------------------------------------------------------------------------------------------------------------------------------------------------------|------|-------------------------|-------------------------|--------|
| 37 | 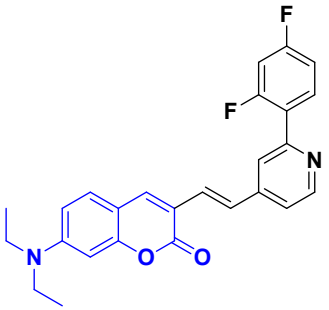   | 1547843 | 699.1 | <p>C-H...O<br/>Ethyl...Coumarin</p> <p>C-H...N<br/>Substituent...Substituent</p>                                                | <p>H-bonding:<br/>C-H...O<br/>Ethyl... Carbonyl</p> <p>C-H...N<br/>Aromatic...Pyridine</p> <p><math>\pi</math>-stacking:<br/>Offset</p>                                          | **** | Anti-parallel<br>Offset | Yes<br>(3.760)          | 2 (2D) |
| 38 |    | 4027132 | 706.8 | <p>C-H...O<br/>Coumarin...Coumarin<br/>(Ring)</p> <p>C-H...O<br/>Ethyl...Coumarin</p> <p>C-H...N<br/>Coumarin...Substituent</p> | <p>H-bonding:<br/>C-H...O<br/>Aromatic...Carbonyl</p> <p>C-H...O<br/>Ethyl... Carbonyl</p> <p>C-H...N<br/>Ethyl...7-azaindazole</p> <p><math>\pi</math>-stacking:<br/>Offset</p> | **** | Anti-parallel           | Yes<br>(3.351)<br>Pairs | 1 (1D) |
| 39 |  | 1558693 | 718.4 | <p><math>\pi</math>-stacking<br/>(C-H...<math>\pi</math>)</p>                                                                   | <p><math>\pi</math>-stacking:<br/>Coumarin...Substituent<br/>C-H...<math>\pi</math><br/>Offset</p>                                                                               | **** | Anti-parallel           | Yes<br>(3.240)<br>Pairs | 1 (2D) |

|    |                                                                                     |         |       |                                                                                                                                                                                                            |                                                                                                                                                                                                                                        |      |               |                         |        |
|----|-------------------------------------------------------------------------------------|---------|-------|------------------------------------------------------------------------------------------------------------------------------------------------------------------------------------------------------------|----------------------------------------------------------------------------------------------------------------------------------------------------------------------------------------------------------------------------------------|------|---------------|-------------------------|--------|
| 40 | 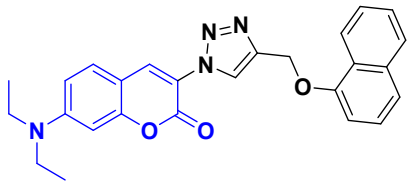   | 1558694 | 720.7 | $\pi$ -stacking<br>(C-H $\cdots\pi$ )                                                                                                                                                                      | $\pi$ -stacking:<br>Coumarin $\cdots$ Substituent<br>C-H $\cdots\pi$<br>Offset                                                                                                                                                         | **** | Anti-parallel | Yes<br>(3.557)<br>Pairs | 1 (2D) |
| 41 |    | 2237330 | 722.6 | C-H $\cdots$ O<br>Coumarin $\cdots$ Coumarin<br>(Ring)<br>C-H $\cdots$ O<br>Ethyl $\cdots$ Coumarin<br>C-H $\cdots$ O<br>Substituent $\cdots$ Coumarin<br>CN $\cdots$ C-H<br>Substituent $\cdots$ Coumarin | H-bonding:<br>C-H $\cdots$ O<br>Aromatic $\cdots$ Carbonyl<br>C-H $\cdots$ O<br>Ethyl $\cdots$ Carbonyl<br>C-H $\cdots$ O<br>Aromatic $\cdots$ Carbonyl<br>CN $\cdots$ C-H<br>CN $\cdots$ Aromatic<br>$\pi$ -stacking:<br>Face to edge | **** | Anti-parallel | Yes<br>(3.652)<br>Pairs | 2 (1D) |
| 42 |  | 2239004 | 737.2 | C-H $\cdots$ O<br>Coumarin $\cdots$ Coumarin<br>(Ring)<br>C-H $\cdots$ O<br>Ethyl $\cdots$ Coumarin<br>(Ring)<br>C-H $\cdots$ N<br>Ethyl $\cdots$ Substituent                                              | H-bonding:<br>C-H $\cdots$ O<br>Aromatic $\cdots$ Carbonyl<br>C-H $\cdots$ O<br>Ethyl $\cdots$ Carbonyl<br>C-H $\cdots$ N<br>Ethyl $\cdots$ Pyridine<br>$\pi$ -stacking:<br>Face to edge<br>Offset                                     | **** | Anti-parallel | Yes<br>(3.469)<br>Pairs | 2 (2D) |

|    |                                                                                     |         |       |                                                                                                                               |                                                                                                                                                                            |      |                                             |                         |        |
|----|-------------------------------------------------------------------------------------|---------|-------|-------------------------------------------------------------------------------------------------------------------------------|----------------------------------------------------------------------------------------------------------------------------------------------------------------------------|------|---------------------------------------------|-------------------------|--------|
| 43 | 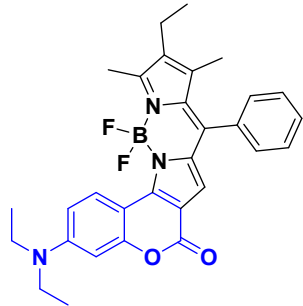   | 7110104 | 759.4 | <p>C-H...O<br/>Substituent...Coumarin</p> <p>C-H...F<br/>Substituent...Substituent</p>                                        | <p>H-bonding:<br/>C-H...O<br/>Methyl...Carbonyl</p> <p>C-H...F<br/>Ethyl/Methyl...F<br/>Aromatic...F</p> <p><math>\pi</math>-stacking:<br/>Offset</p>                      | **** | Anti-parallel<br>(between BODIPY fragments) | Yes<br>(3.797)<br>Pairs | 1 (2D) |
| 44 |    | 7023928 | 760.9 | <p>N-H...O<br/>Substituent...Coumarin</p> <p>C-H...O<br/>Ethyl...Substituent</p> <p>C-H...O<br/>Substituent...Substituent</p> | <p>H-bonding:<br/>N-H...O<br/>Amide...Carbonyl</p> <p>C-H...O<br/>Ethyl...Carbonyl</p> <p>C-H...O<br/>Aromatic...Carbonyl</p> <p><math>\pi</math>-stacking:<br/>Offset</p> | **** | Anti-parallel                               | Yes<br>(3.507)<br>Pairs | 2 (1D) |
| 45 |  | 7219031 | 768.0 | <p>C-H...O<br/>Substituent...Coumarin</p> <p>C-H...N<br/>Substituent...Substituent</p>                                        | <p>H-bonding:<br/>C-H...O<br/>Aromatic...Carbonyl</p> <p>C-H...O<br/>Ethyl...Carbonyl</p> <p>C-H...N<br/>Methylene...N</p> <p><math>\pi</math>-stacking:<br/>Offset</p>    | **** | Anti-parallel                               | Yes<br>(3.564)<br>Pairs | 1 (2D) |

|    |                                                                                     |         |       |                                                                                                                                                                           |                                                                                                                                                                                                                   |                                                       |               |                         |        |
|----|-------------------------------------------------------------------------------------|---------|-------|---------------------------------------------------------------------------------------------------------------------------------------------------------------------------|-------------------------------------------------------------------------------------------------------------------------------------------------------------------------------------------------------------------|-------------------------------------------------------|---------------|-------------------------|--------|
| 46 | 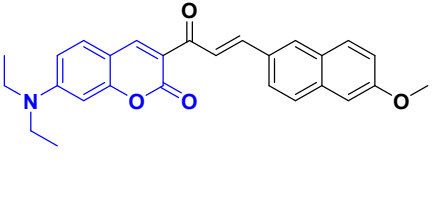   | 2212633 | 772.2 | <p>C-H...O<br/>Coumarin...Coumarin<br/>(Ring)</p> <p>C-H...O<br/>Ethyl...Coumarin</p> <p>C-H...O<br/>Ethyl...Substituent</p> <p>C-H...O<br/>Substituent...Substituent</p> | <p>H-bonding:<br/>C-H...O<br/>Aromatic...Carbonyl</p> <p>C-H...O<br/>Ethyl...Carbonyl</p> <p>C-H...O<br/>Ethyl...Carbonyl</p> <p>C-H...O<br/>Aromatic...Carbonyl</p> <p><math>\pi</math>-stacking:<br/>Offset</p> | ****                                                  | Anti-parallel | Yes<br>(3.719)          | 1 (2D) |
| 47 |   | 4028361 | 775.6 | <p>C-H...O<br/>Ethyl...Coumarin<br/>(Ring)</p> <p>C-H...O<br/>Ethyl...Substituent</p> <p>C-H...O<br/>Substituent...Substituent<br/>(Ring)</p>                             | <p>H-bonding:<br/>C-H...O<br/>Ethyl...Carbonyl</p> <p>C-H...O<br/>Ethyl...Carbonyl</p> <p>C-H...O<br/>Aromatic...Carbonyl</p> <p><math>\pi</math>-stacking:<br/>Offset</p>                                        | ****                                                  | Anti-parallel | Yes<br>(3.488)<br>Pairs | 2 (2D) |
| 48 |  | 1544743 | 785.5 | <p>C-H...O<br/>Substituent...Coumarin</p> <p>Coumarin...Substituent<br/>(C-H...<math>\pi</math>)</p> <p>Substituent...Substituent</p>                                     | <p><math>\pi</math>-stacking:<br/>Coumarin...Substituent<br/>(C-H...<math>\pi</math>)<br/>Edge to face</p> <p>Substituent...Substituent<br/>Offset</p>                                                            | <p>H-bonding:<br/>C-H...O<br/>Aromatic...Carbonyl</p> | No            | ****                    | ****   |

|    |                                                                                    |         |       |                                                                                                                                                         |                                                                                                                                         |                                                                                           |                                   |    |                    |
|----|------------------------------------------------------------------------------------|---------|-------|---------------------------------------------------------------------------------------------------------------------------------------------------------|-----------------------------------------------------------------------------------------------------------------------------------------|-------------------------------------------------------------------------------------------|-----------------------------------|----|--------------------|
| 49 | 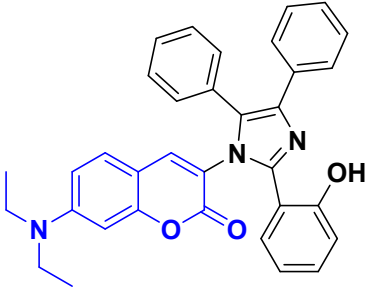  | 7229754 | 787.9 | <p>C-H...O<br/>Coumarin...Coumarin<br/>(Chain)</p> <p>Substituent...Coumarin<br/>(C-H...<math>\pi</math>)</p>                                           | <p><math>\pi</math>-stacking:<br/>Phenol...Phenol<br/>Offset</p> <p>Phenyl...Coumarin<br/>(C-H...<math>\pi</math>)<br/>Edge to face</p> | <p>H-bonding:<br/>C-H...O<br/>Aromatic...Carbonyl</p>                                     | <p>Parallel<br/>Anti-parallel</p> | No | 1 (1D)             |
| 50 |  | 7229755 | 788.6 | <p>C-H...O<br/>Ethyl...Coumarin<br/>(Chain)</p> <p>C-H...N<br/>Substituent...Substituent</p> <p>Substituent...Coumarin<br/>(C-H...<math>\pi</math>)</p> | <p>Phenyl...Coumarin<br/>(C-H...<math>\pi</math>)<br/>Edge to face</p>                                                                  | <p>H-bonding:<br/>C-H...O<br/>Ethyl...Carbonyl</p> <p>C-H...N<br/>Aromatic...pyrazole</p> | <p>Parallel<br/>Anti-parallel</p> | No | Phenyl<br>embraces |

**Table S4.** Frontier molecular orbital (FMO) energies,  $E_{HOMO}$  and  $E_{LUMO}$  for molecules **01-50** and FMO energy gap  $\Delta E_{HOMO-LUMO}$ , calculated at the MN15(CPCM,  $\epsilon = 3.5$ )/def2TZVP level of theory.

|                | $E_{HOMO}$ |       | $E_{LUMO}$ |       | $\Delta E_{HOMO-LUMO}$ |      |          |
|----------------|------------|-------|------------|-------|------------------------|------|----------|
|                | Ha         | eV    | Ha         | eV    | Ha                     | eV   | kcal/mol |
| <b>1</b>       | -0.22879   | -6.23 | -0.03577   | -0.97 | 0.19302                | 5.25 | 121.1    |
| <b>2</b>       | -0.23890   | -6.50 | -0.06545   | -1.78 | 0.17345                | 4.72 | 108.8    |
| <b>3</b>       | -0.24323   | -6.62 | -0.06104   | -1.66 | 0.18219                | 4.96 | 114.3    |
| <b>4</b>       | -0.23575   | -6.42 | -0.05190   | -1.41 | 0.18385                | 5.00 | 115.4    |
| <b>5</b>       | -0.23699   | -6.45 | -0.05958   | -1.62 | 0.17741                | 4.83 | 111.3    |
| <b>6</b>       | -0.23760   | -6.47 | -0.05457   | -1.48 | 0.18303                | 4.98 | 114.9    |
| <b>7</b>       | -0.21420   | -5.83 | -0.02522   | -0.69 | 0.18898                | 5.14 | 118.6    |
| <b>8</b>       | -0.22424   | -6.10 | -0.05112   | -1.39 | 0.17312                | 4.71 | 108.6    |
| <b>9</b>       | -0.22689   | -6.17 | -0.05068   | -1.38 | 0.17621                | 4.79 | 110.6    |
| <b>10</b>      | -0.23665   | -6.44 | -0.05379   | -1.46 | 0.18286                | 4.98 | 114.7    |
| <b>11</b>      | -0.23504   | -6.40 | -0.06909   | -1.88 | 0.16595                | 4.52 | 104.1    |
| <b>12</b>      | -0.23681   | -6.44 | -0.05625   | -1.53 | 0.18056                | 4.91 | 113.3    |
| <b>13</b>      | -0.22726   | -6.18 | -0.04845   | -1.32 | 0.17881                | 4.87 | 112.2    |
| <b>14</b>      | -0.22855   | -6.22 | -0.04377   | -1.19 | 0.18478                | 5.03 | 116.0    |
| <b>15</b>      | -0.22871   | -6.22 | -0.05796   | -1.58 | 0.17075                | 4.65 | 107.1    |
| <b>16</b>      | -0.2368    | -6.44 | -0.05932   | -1.61 | 0.17748                | 4.83 | 111.4    |
| <b>17</b>      | -0.22841   | -6.22 | -0.0568    | -1.55 | 0.17161                | 4.67 | 107.7    |
| <b>18</b>      | -0.23814   | -6.48 | -0.05428   | -1.48 | 0.18386                | 5.00 | 115.4    |
| <b>19</b>      | -0.23253   | -6.33 | -0.05316   | -1.45 | 0.17937                | 4.88 | 112.6    |
| <b>20</b>      | -0.22877   | -6.23 | -0.04471   | -1.22 | 0.18406                | 5.01 | 115.5    |
| <b>21</b>      | -0.23868   | -6.49 | -0.06057   | -1.65 | 0.17811                | 4.85 | 111.8    |
| <b>22</b>      | -0.24114   | -6.56 | -0.07256   | -1.97 | 0.16858                | 4.59 | 105.8    |
| <b>23</b>      | -0.22823   | -6.21 | -0.05318   | -1.45 | 0.17505                | 4.76 | 109.8    |
| <b>24</b>      | -0.22715   | -6.18 | -0.05602   | -1.52 | 0.17113                | 4.66 | 107.4    |
| <b>25</b>      | -0.22791   | -6.20 | -0.03686   | -1.00 | 0.19105                | 5.20 | 119.9    |
| <b>26</b>      | -0.23138   | -6.30 | -0.05038   | -1.37 | 0.18100                | 4.93 | 113.6    |
| <b>27</b>      | -0.22855   | -6.22 | -0.06126   | -1.67 | 0.16729                | 4.55 | 105.0    |
| <b>28</b>      | -0.22759   | -6.19 | -0.06079   | -1.65 | 0.16680                | 4.54 | 104.7    |
| <b>29</b>      | -0.22919   | -6.24 | -0.05197   | -1.41 | 0.17722                | 4.82 | 111.2    |
| <b>30</b>      | -0.23094   | -6.28 | -0.06011   | -1.64 | 0.17083                | 4.65 | 107.2    |
| <b>31</b>      | -0.23906   | -6.51 | -0.0616    | -1.68 | 0.17746                | 4.83 | 111.4    |
| <b>32</b>      | -0.23892   | -6.50 | -0.06978   | -1.90 | 0.16914                | 4.60 | 106.1    |
| <b>33</b>      | -0.23389   | -6.36 | -0.05427   | -1.48 | 0.17962                | 4.89 | 112.7    |
| <b>34</b>      | -0.23083   | -6.28 | -0.07694   | -2.09 | 0.15389                | 4.19 | 96.6     |
| <b>35</b>      | -0.22739   | -6.19 | -0.06284   | -1.71 | 0.16455                | 4.48 | 103.3    |
| <b>36</b>      | -0.22501   | -6.12 | -0.0593    | -1.61 | 0.16571                | 4.51 | 104.0    |
| <b>37</b>      | -0.22349   | -6.08 | -0.05711   | -1.55 | 0.16638                | 4.53 | 104.4    |
| <b>38</b>      | -0.23188   | -6.31 | -0.05280   | -1.44 | 0.17908                | 4.87 | 112.4    |
| <b>39</b>      | -0.23067   | -6.28 | -0.05284   | -1.44 | 0.17783                | 4.84 | 111.6    |
| <b>40</b>      | -0.23271   | -6.33 | -0.05385   | -1.47 | 0.17886                | 4.87 | 112.2    |
| <b>41</b>      | -0.24082   | -6.55 | -0.05957   | -1.62 | 0.18125                | 4.93 | 113.7    |
| <b>42</b>      | -0.21571   | -5.87 | -0.05742   | -1.56 | 0.15829                | 4.31 | 99.3     |
| <b>43</b>      | -0.21551   | -5.86 | -0.08519   | -2.32 | 0.13032                | 3.55 | 81.8     |
| <b>44</b>      | -0.23572   | -6.41 | -0.05162   | -1.40 | 0.18410                | 5.01 | 115.5    |
| <b>45</b>      | -0.22437   | -6.11 | -0.04544   | -1.24 | 0.17893                | 4.87 | 112.3    |
| <b>46</b>      | -0.23330   | -6.35 | -0.06969   | -1.90 | 0.16361                | 4.45 | 102.7    |
| <b>47</b>      | -0.22866   | -6.22 | -0.03810   | -1.04 | 0.19056                | 5.19 | 119.6    |
| <b>48</b>      | -0.21935   | -5.97 | -0.05976   | -1.63 | 0.15959                | 4.34 | 100.1    |
| <b>49</b>      | -0.23148   | -6.30 | -0.04823   | -1.31 | 0.18325                | 4.99 | 115.0    |
| <b>50</b>      | -0.23138   | -6.30 | -0.04718   | -1.28 | 0.18420                | 5.01 | 115.6    |
| <b>Average</b> | -0.23090   | -6.28 | -0.05560   | -1.51 | 0.17530                | 4.77 | 110.0    |
| $\sigma$       | 0.00657    | 0.18  | 0.01037    | 0.28  | 0.01081                | 0.29 | 6.781954 |



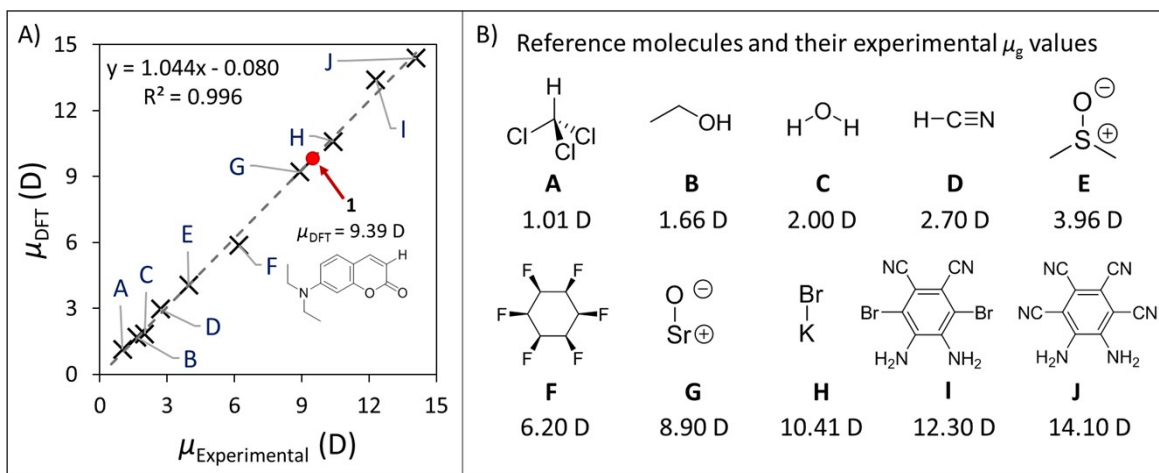

**Figure S10.** Molecular dipole moments for DAC-H **1** and a series of reference compounds, **A-J**. All values were calculated at the MN15(CPCM)/def2TZVP level of theory. Experimental values were obtained from: Weast, Robert C. (1984). CRC Handbook of Chemistry and Physics (65th ed.). CRC Press. ISBN 0-8493-0465-2.

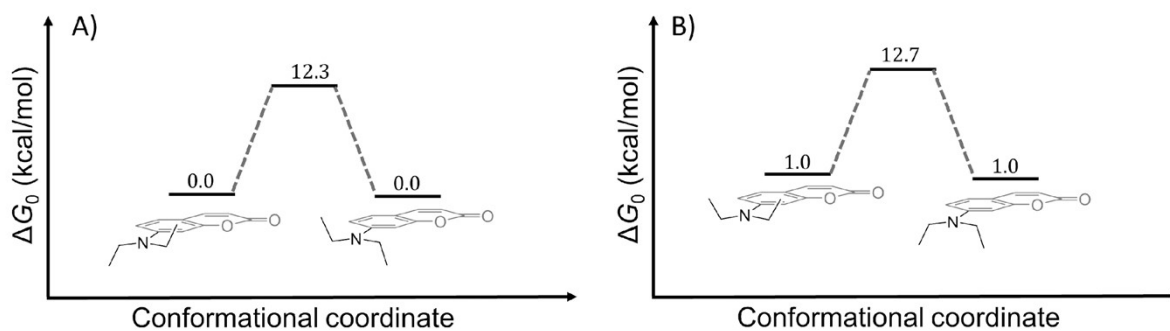

**Figure S11.** Conformational profiles for rotation around the Et<sub>2</sub>N-coumarin bond, calculated using the DFT protocol MN15(CPCM)/def2TZVP

### Cartesian coordinates and DFT energies of compounds 1-50

In this section we provide optimized geometries for compounds **1-50**, in XYZ format, and their final electronic potential energies obtained using DFT. All calculations were carried out using the global hybrid *m*-GGA functional MN15 with the triple-zeta polarized basis def2-TZVP, with the CPCM polarizable continuum model and a relative electric permittivity  $\epsilon = 3.5$ . All geometries were confirmed as minima by the absence of imaginary eigenvalues upon Hessian diagonalization. The naming convention in all cases is: Molecule (sequential number from **Figure 3**)\_(COD deposition code).

Molecule 01\_1438103

Cartesian Coordinates (in Angstroms) and Total Electronic Potential Energy (in kcal/mol)

31

c01\_1438103.xyz.out Energy: -444933.7678063

|   |         |         |          |
|---|---------|---------|----------|
| C | 6.88472 | 5.32039 | -5.30578 |
| C | 5.62384 | 6.01295 | -5.42530 |
| H | 5.41613 | 6.46469 | -6.38471 |
| C | 4.77264 | 6.07993 | -4.37847 |
| H | 3.82708 | 6.60393 | -4.47155 |
| C | 5.09467 | 5.46774 | -3.13171 |
| C | 6.31386 | 4.79114 | -3.02859 |
| C | 6.72761 | 4.16380 | -1.87161 |
| H | 7.69711 | 3.68596 | -1.87669 |
| C | 5.90572 | 4.18705 | -0.72973 |
| C | 7.48441 | 2.75218 | 0.49560  |
| H | 7.60647 | 2.20063 | -0.43889 |
| H | 7.31607 | 1.99816 | 1.26916  |
| C | 8.72972 | 3.56094 | 0.81898  |
| H | 8.91010 | 4.32447 | 0.05968  |
| H | 9.60836 | 2.91557 | 0.87186  |
| H | 8.61886 | 4.06429 | 1.78233  |
| C | 5.53228 | 3.70456 | 1.66029  |
| H | 5.12315 | 4.71394 | 1.73552  |
| H | 6.24511 | 3.60984 | 2.48405  |
| C | 4.43755 | 2.65996 | 1.79824  |
| H | 3.71608 | 2.73849 | 0.98231  |
| H | 3.90342 | 2.77970 | 2.74270  |
| H | 4.86339 | 1.65421 | 1.77392  |
| C | 4.66355 | 4.87227 | -0.82226 |
| H | 3.99252 | 4.89727 | 0.02462  |
| C | 4.28243 | 5.48797 | -1.98849 |
| H | 3.32689 | 5.99853 | -2.03789 |
| N | 6.28563 | 3.57039 | 0.42459  |
| O | 7.16064 | 4.73743 | -4.09691 |
| O | 7.72285 | 5.20767 | -6.17688 |

Molecule 02\_2230615

Cartesian Coordinates (in Angstroms) and Total Electronic Potential Energy (in kcal/mol)

33

c02\_2230615.xyz.out Energy: -516001.4716344

|   |          |          |          |
|---|----------|----------|----------|
| O | 6.16730  | 0.04875  | -1.65186 |
| O | 4.26818  | -0.82077 | -2.35709 |
| O | 3.09411  | -1.87354 | 1.42647  |
| N | 10.34500 | 1.96981  | -0.49629 |
| C | 4.97458  | -0.58206 | -1.40212 |
| C | 4.68573  | -0.89679 | -0.01921 |
| C | 5.58158  | -0.57402 | 0.96317  |
| H | 5.33811  | -0.82543 | 1.99155  |
| C | 6.79543  | 0.06724  | 0.66294  |
| C | 7.06459  | 0.37578  | -0.68239 |
| C | 8.22142  | 0.99900  | -1.08598 |
| H | 8.35646  | 1.17778  | -2.14316 |
| C | 9.19643  | 1.35444  | -0.12945 |
| C | 8.93368  | 1.04883  | 1.23990  |
| H | 9.64583  | 1.32743  | 2.00307  |
| C | 7.77388  | 0.42864  | 1.61053  |
| H | 7.58726  | 0.21097  | 2.65602  |
| C | 3.42573  | -1.56437 | 0.29409  |
| H | 2.77182  | -1.78158 | -0.56371 |
| C | 11.42987 | 2.22320  | 0.44192  |
| H | 11.50229 | 1.39896  | 1.15314  |
| H | 12.35859 | 2.20524  | -0.13383 |
| C | 11.28370 | 3.55581  | 1.15554  |
| H | 11.25919 | 4.37598  | 0.43462  |
| H | 12.12226 | 3.72415  | 1.83334  |
| H | 10.35952 | 3.59064  | 1.73619  |
| C | 10.58461 | 2.40023  | -1.86631 |
| H | 11.25763 | 3.25981  | -1.81902 |
| H | 9.65430  | 2.76891  | -2.30146 |
| C | 11.19475 | 1.30352  | -2.72180 |
| H | 12.15025 | 0.97827  | -2.30416 |
| H | 11.37175 | 1.66129  | -3.73736 |
| H | 10.53588 | 0.43449  | -2.77410 |

Molecule 03a\_1553722

Cartesian Coordinates (in Angstroms) and Total Electronic Potential Energy (in kcal/mol)

34

c03a\_1553722.xyz.out Energy: -563205.0580647

|   |         |         |         |
|---|---------|---------|---------|
| N | 1.28752 | 8.09836 | 5.69141 |
| O | 5.05253 | 5.36914 | 6.64950 |
| O | 6.72438 | 4.08481 | 7.26585 |
| O | 8.53122 | 3.35889 | 5.52742 |
| H | 8.04279 | 3.44671 | 6.38619 |
| O | 8.31624 | 4.07461 | 3.44358 |
| C | 6.18822 | 4.69340 | 6.34890 |
| C | 6.66005 | 4.75146 | 4.98825 |
| C | 5.96072 | 5.47181 | 4.06163 |
| H | 6.33162 | 5.50477 | 3.04215 |
| C | 4.78365 | 6.16155 | 4.40657 |

|   |          |          |         |
|---|----------|----------|---------|
| C | 4.34229  | 6.09183  | 5.73632 |
| C | 3.21151  | 6.72949  | 6.18792 |
| H | 2.96031  | 6.62762  | 7.23348 |
| C | 2.43194  | 7.48829  | 5.28958 |
| C | 2.87661  | 7.57691  | 3.93571 |
| H | 2.31652  | 8.15711  | 3.21759 |
| C | 4.00668  | 6.93066  | 3.51869 |
| H | 4.32293  | 7.00641  | 2.48474 |
| C | 7.89530  | 4.04143  | 4.58142 |
| C | 0.87188  | 8.05350  | 7.08805 |
| H | -0.19588 | 8.27384  | 7.11323 |
| H | 0.97532  | 7.03072  | 7.45645 |
| C | 1.62577  | 9.02490  | 7.98347 |
| H | 1.40110  | 10.05868 | 7.71765 |
| H | 1.34042  | 8.87534  | 9.02632 |
| H | 2.70530  | 8.88212  | 7.90343 |
| C | 0.56317  | 8.99944  | 4.80185 |
| H | 0.41469  | 8.51093  | 3.83622 |
| H | -0.43258 | 9.13234  | 5.22603 |
| C | 1.23345  | 10.35287 | 4.62137 |
| H | 2.25679  | 10.24524 | 4.25653 |
| H | 0.67807  | 10.95483 | 3.89976 |
| H | 1.26894  | 10.90144 | 5.56340 |

Molecule 03b\_2209698

Cartesian Coordinates (in Angstroms) and Total Electronic Potential Energy (in kcal/mol)

34

c03b\_2209698.xyz.out Energy: -563205.0519182

|   |          |          |          |
|---|----------|----------|----------|
| O | 6.15501  | 1.96772  | -1.78167 |
| O | 4.35571  | 2.98746  | -1.04054 |
| O | 2.66267  | 4.05053  | -2.72285 |
| O | 3.11173  | 3.89398  | -4.88508 |
| N | 10.12017 | -0.34363 | -3.00480 |
| C | 5.00802  | 2.64986  | -2.01977 |
| C | 4.66111  | 2.91458  | -3.39353 |
| C | 5.48293  | 2.47713  | -4.39332 |
| H | 5.20575  | 2.68578  | -5.42161 |
| C | 6.66620  | 1.76948  | -4.11193 |
| C | 7.56962  | 1.28753  | -5.07905 |
| H | 7.35083  | 1.46214  | -6.12619 |
| C | 8.70330  | 0.61285  | -4.72203 |
| H | 9.36552  | 0.26154  | -5.49942 |
| C | 9.01171  | 0.35982  | -3.35129 |
| C | 8.11633  | 0.84702  | -2.37586 |
| H | 8.28412  | 0.71982  | -1.31646 |
| C | 6.98510  | 1.52230  | -2.76832 |
| C | 3.42433  | 3.65471  | -3.73703 |
| C | 11.13582 | -0.68248 | -3.99605 |
| H | 10.66076 | -1.16798 | -4.85171 |
| H | 11.78029 | -1.43669 | -3.54375 |

|   |          |          |          |
|---|----------|----------|----------|
| C | 11.97127 | 0.50480  | -4.45056 |
| H | 12.66822 | 0.19608  | -5.23187 |
| H | 12.55058 | 0.91668  | -3.62330 |
| H | 11.34521 | 1.30371  | -4.85244 |
| C | 10.44500 | -0.57846 | -1.60356 |
| H | 11.10243 | -1.44820 | -1.56605 |
| H | 9.53521  | -0.86711 | -1.07345 |
| C | 11.11047 | 0.60753  | -0.92221 |
| H | 11.23933 | 0.40770  | 0.14306  |
| H | 10.50968 | 1.51318  | -1.02817 |
| H | 12.09509 | 0.80293  | -1.34919 |
| H | 3.07601  | 3.76915  | -1.86652 |

Molecule 04\_2000551

Cartesian Coordinates (in Angstroms) and Total Electronic Potential Energy (in kcal/mol)

34

c04\_2000551.xyz.out Energy: -656356.8541574

|   |          |          |          |
|---|----------|----------|----------|
| O | 8.94023  | 16.20596 | 8.87942  |
| C | 8.94161  | 17.11263 | 9.89739  |
| C | 10.23331 | 17.58441 | 10.34834 |
| C | 11.36609 | 17.13267 | 9.77272  |
| C | 12.44652 | 15.63559 | 8.03344  |
| C | 12.29864 | 14.72442 | 7.01958  |
| C | 11.01255 | 14.28495 | 6.60214  |
| C | 9.89712  | 14.82179 | 7.26985  |
| C | 10.07603 | 15.73863 | 8.28294  |
| C | 11.33694 | 16.17890 | 8.70504  |
| O | 7.87196  | 17.45695 | 10.34872 |
| N | 10.86820 | 13.38438 | 5.59446  |
| C | 12.00628 | 12.71711 | 4.98209  |
| C | 12.59237 | 13.50410 | 3.82238  |
| C | 9.56021  | 13.01412 | 5.07812  |
| C | 8.92571  | 11.87359 | 5.85605  |
| C | 12.69832 | 17.64238 | 10.26683 |
| F | 13.38269 | 18.24565 | 9.28641  |
| F | 12.57292 | 18.52339 | 11.25720 |
| F | 13.46239 | 16.64160 | 10.72303 |
| H | 10.22683 | 18.30202 | 11.15503 |
| H | 13.44717 | 15.94237 | 8.30871  |
| H | 13.18630 | 14.35687 | 6.52501  |
| H | 8.88371  | 14.52880 | 7.03478  |
| H | 11.65749 | 11.74125 | 4.63463  |
| H | 12.76407 | 12.51079 | 5.73997  |
| H | 12.94512 | 14.48348 | 4.15239  |
| H | 13.43221 | 12.96857 | 3.37605  |
| H | 11.83916 | 13.66156 | 3.04707  |
| H | 9.69672  | 12.72538 | 4.03287  |
| H | 8.90929  | 13.89070 | 5.06464  |
| H | 9.56163  | 10.98604 | 5.81985  |
| H | 7.95307  | 11.61255 | 5.43550  |

H 8.78449 12.14434 6.90433

Molecule 05\_2208873

Cartesian Coordinates (in Angstroms) and Total Electronic Potential Energy (in kcal/mol)

36

c05\_2208873.xyz.out Energy: -540653.3619905

|   |          |         |          |
|---|----------|---------|----------|
| C | 4.11643  | 3.48859 | 20.67016 |
| C | 4.14694  | 4.14072 | 21.96499 |
| C | 3.03898  | 4.81812 | 22.39812 |
| H | 3.08336  | 5.29928 | 23.37028 |
| C | 0.69094  | 5.58334 | 22.02260 |
| H | 0.68010  | 6.09333 | 22.97919 |
| C | -0.41513 | 5.61513 | 21.21968 |
| H | -1.28533 | 6.16503 | 21.54775 |
| C | -0.42146 | 4.95815 | 19.95268 |
| C | 0.74906  | 4.28130 | 19.55183 |
| H | 0.81546  | 3.74261 | 18.61741 |
| C | 1.84618  | 4.26996 | 20.38218 |
| C | 1.86280  | 4.90604 | 21.63240 |
| C | 5.33789  | 4.10464 | 22.84871 |
| C | 6.58522  | 3.39633 | 22.42256 |
| H | 6.96065  | 3.81004 | 21.48546 |
| H | 6.38047  | 2.34174 | 22.23169 |
| H | 7.32786  | 3.50303 | 23.21102 |
| C | -2.78520 | 5.55921 | 19.59797 |
| H | -2.93315 | 5.35569 | 20.65956 |
| H | -3.57790 | 5.01772 | 19.07552 |
| C | -2.88751 | 7.04582 | 19.30459 |
| H | -3.85483 | 7.43669 | 19.62478 |
| H | -2.78246 | 7.23359 | 18.23366 |
| H | -2.10300 | 7.60171 | 19.82222 |
| C | -1.51034 | 4.43482 | 17.81322 |
| H | -0.54439 | 4.63002 | 17.34410 |
| H | -2.24674 | 4.99465 | 17.23157 |
| C | -1.84298 | 2.95287 | 17.78987 |
| H | -1.83793 | 2.57321 | 16.76685 |
| H | -2.83440 | 2.77650 | 18.21319 |
| H | -1.12045 | 2.37830 | 18.37271 |
| N | -1.51961 | 4.98846 | 19.15917 |
| O | 2.94593  | 3.59856 | 19.95480 |
| O | 5.00124  | 2.85429 | 20.13843 |
| O | 5.28944  | 4.66435 | 23.93686 |

Molecule 06a\_2229947

Cartesian Coordinates (in Angstroms) and Total Electronic Potential Energy (in kcal/mol)

37

c06a\_2229947.xyz.out Energy: -585425.8500230

|   |         |         |          |
|---|---------|---------|----------|
| C | 6.21392 | 9.14834 | -5.62210 |
| C | 5.22242 | 8.09528 | -5.68229 |

|   |         |          |          |
|---|---------|----------|----------|
| C | 5.04607 | 7.21906  | -6.87166 |
| C | 4.40806 | 7.88114  | -4.60970 |
| H | 3.67318 | 7.08537  | -4.67620 |
| C | 4.49838 | 8.65805  | -3.43547 |
| C | 5.45924 | 9.67530  | -3.39537 |
| C | 5.64212 | 10.49416 | -2.30368 |
| H | 6.41855 | 11.24285 | -2.36070 |
| C | 4.83099 | 10.32837 | -1.16328 |
| C | 3.85878 | 9.28524  | -1.18664 |
| H | 3.22635 | 9.11427  | -0.32813 |
| C | 3.70152 | 8.48912  | -2.28870 |
| H | 2.95139 | 7.70650  | -2.28718 |
| C | 4.23252 | 10.87349 | 1.15312  |
| H | 4.27450 | 11.78261 | 1.75408  |
| H | 3.17553 | 10.71340 | 0.92754  |
| C | 4.79182 | 9.70235  | 1.94695  |
| H | 5.80426 | 9.91116  | 2.29479  |
| H | 4.16749 | 9.50638  | 2.82082  |
| H | 4.82493 | 8.79288  | 1.34387  |
| C | 5.99071 | 12.17100 | -0.04689 |
| H | 6.00019 | 12.69882 | -1.00318 |
| H | 5.69092 | 12.90834 | 0.69897  |
| C | 7.37590 | 11.63384 | 0.28139  |
| H | 7.65788 | 10.82480 | -0.39543 |
| H | 8.12026 | 12.42713 | 0.19049  |
| H | 7.41607 | 11.24997 | 1.30169  |
| N | 4.95487 | 11.14735 | -0.08321 |
| N | 5.86100 | 7.42645  | -7.92225 |
| H | 6.56390 | 8.15699  | -7.88936 |
| N | 5.76709 | 6.64297  | -9.07447 |
| H | 5.88572 | 5.66549  | -8.81227 |
| H | 4.82357 | 6.72831  | -9.44958 |
| O | 6.26830 | 9.88073  | -4.47035 |
| O | 7.01040 | 9.45709  | -6.48945 |
| O | 4.18435 | 6.33705  | -6.88463 |

Molecule 06b\_7117321

Cartesian Coordinates (in Angstroms) and Total Electronic Potential Energy (in kcal/mol)

37

c06b\_7117321.xyz.out Energy: -585425.8467317

|   |         |         |          |
|---|---------|---------|----------|
| N | 0.79699 | 6.20650 | 2.20560  |
| N | 1.74747 | 2.59630 | -5.67957 |
| H | 2.45375 | 3.32261 | -5.63007 |
| N | 1.65781 | 1.83192 | -6.84487 |
| H | 0.71725 | 1.92768 | -7.22480 |
| H | 1.77031 | 0.84980 | -6.59772 |
| O | 2.14351 | 4.99299 | -2.18642 |
| O | 2.89930 | 4.59539 | -4.20572 |
| O | 0.06089 | 1.49619 | -4.66969 |
| C | 1.83725 | 7.22460 | 2.26452  |

|   |          |         |          |
|---|----------|---------|----------|
| H | 1.85707  | 7.76522 | 1.31549  |
| H | 1.53456  | 7.95314 | 3.01782  |
| C | 3.21714  | 6.67636 | 2.59686  |
| H | 3.50080  | 5.87510 | 1.91155  |
| H | 3.96605  | 7.46710 | 2.52272  |
| H | 3.24715  | 6.27859 | 3.61217  |
| C | 0.60686  | 4.73872 | 4.21673  |
| H | 1.61587  | 4.93986 | 4.57882  |
| H | -0.02814 | 4.53399 | 5.08085  |
| H | 0.64410  | 3.83674 | 3.60273  |
| C | 0.06056  | 5.92133 | 3.43098  |
| H | 0.09993  | 6.82313 | 4.04303  |
| H | -0.99461 | 5.76840 | 3.19236  |
| C | 0.67958  | 5.40192 | 1.11407  |
| C | -0.29710 | 4.36371 | 1.06804  |
| H | -0.93741 | 4.18324 | 1.91874  |
| C | -0.44892 | 3.58422 | -0.04660 |
| H | -1.20282 | 2.80540 | -0.06255 |
| C | 0.35833  | 3.76553 | -1.18418 |
| C | 1.32434  | 4.77673 | -1.12129 |
| C | 1.50211  | 5.57890 | -0.01646 |
| H | 2.28316  | 6.32390 | -0.05605 |
| C | 0.27335  | 3.00637 | -2.37039 |
| H | -0.46534 | 2.21578 | -2.45408 |
| C | 1.09726  | 3.23189 | -3.43335 |
| C | 2.09415  | 4.27824 | -3.34949 |
| C | 0.92548  | 2.37488 | -4.63737 |

Molecule 07\_2206681

Cartesian Coordinates (in Angstroms) and Total Electronic Potential Energy (in kcal/mol)

39

c07\_2206681.xyz.out Energy: -528926.2437533

|   |         |          |          |
|---|---------|----------|----------|
| O | 1.18017 | 2.62625  | 1.83270  |
| O | 0.30940 | 4.20652  | 3.08263  |
| N | 2.79747 | 5.38842  | 3.61757  |
| N | 2.62144 | -0.78347 | -1.15935 |
| C | 1.32162 | 3.73025  | 2.61611  |
| C | 2.68011 | 4.24585  | 2.81587  |
| C | 3.70557 | 3.65425  | 2.15041  |
| C | 3.49612 | 2.53478  | 1.28619  |
| C | 4.50033 | 1.87569  | 0.56435  |
| C | 4.22264 | 0.79067  | -0.23420 |
| C | 2.90035 | 0.29070  | -0.35989 |
| C | 1.88803 | 0.94411  | 0.36311  |
| C | 2.20457 | 2.03163  | 1.15346  |
| C | 2.34784 | 5.22774  | 4.99657  |
| C | 4.09067 | 6.03437  | 3.57518  |
| C | 1.25859 | -1.22476 | -1.39541 |
| C | 0.76122 | -2.19712 | -0.33797 |
| C | 3.66748 | -1.56309 | -1.79694 |



|   |          |          |          |
|---|----------|----------|----------|
| C | 4.07260  | -1.01170 | -3.15427 |
| H | 4.71802  | 4.02523  | 2.25922  |
| H | 5.51979  | 2.23891  | 0.63629  |
| H | 5.03143  | 0.33211  | -0.78563 |
| H | 0.85747  | 0.61843  | 0.34209  |
| H | 3.06125  | 4.62301  | 5.57619  |
| H | 2.27043  | 6.20918  | 5.46602  |
| H | 1.37106  | 4.75428  | 5.03437  |
| H | 4.37103  | 6.26461  | 2.54627  |
| H | 4.88688  | 5.42190  | 4.02749  |
| H | 4.03372  | 6.96972  | 4.13263  |
| H | 1.23590  | -1.70019 | -2.37993 |
| H | 0.59935  | -0.35680 | -1.46792 |
| H | 0.78478  | -1.74251 | 0.65450  |
| H | -0.26352 | -2.50935 | -0.54795 |
| H | 1.39069  | -3.08991 | -0.31401 |
| H | 3.28924  | -2.58310 | -1.90781 |
| H | 4.53052  | -1.63737 | -1.13188 |
| H | 4.44869  | 0.00968  | -3.06559 |
| H | 3.21545  | -0.99575 | -3.83152 |
| H | 4.85199  | -1.62732 | -3.60766 |

Molecule 08\_1551651

Cartesian Coordinates (in Angstroms) and Total Electronic Potential Energy (in kcal/mol)

37

c08\_1551651.xyz.out Energy: -598496.4122413

|   |          |          |          |
|---|----------|----------|----------|
| O | -1.37735 | 6.23233  | -0.12568 |
| O | -2.94615 | 4.69222  | -0.24645 |
| O | -1.73748 | 3.59222  | -4.12378 |
| N | 1.86714  | 9.64851  | 0.48690  |
| N | -3.41842 | 2.21032  | -3.73941 |
| C | -2.02007 | 5.23947  | -0.80507 |
| C | -1.53357 | 4.92833  | -2.13834 |
| C | -0.48318 | 5.62699  | -2.65193 |
| C | 0.15214  | 6.65505  | -1.91168 |
| C | 1.23554  | 7.42449  | -2.36809 |
| C | 1.79916  | 8.40299  | -1.59077 |
| C | 1.30474  | 8.67952  | -0.28508 |
| C | 0.21813  | 7.91434  | 0.17971  |
| C | -0.32319 | 6.93674  | -0.62664 |
| C | 1.46426  | 9.85895  | 1.86792  |
| C | 0.28065  | 10.80305 | 1.99653  |
| C | 2.89745  | 10.54172 | -0.01851 |
| C | 4.29811  | 9.97837  | 0.15270  |
| C | -2.20407 | 3.87245  | -2.86534 |
| C | -2.51498 | 2.59140  | -4.57365 |
| C | -3.23703 | 3.02316  | -2.62937 |
| H | -0.12027 | 5.39713  | -3.64802 |
| H | 1.63427  | 7.22765  | -3.35704 |
| H | 2.64459  | 8.95375  | -1.97736 |

|   |          |          |          |
|---|----------|----------|----------|
| H | -0.23202 | 8.07518  | 1.14907  |
| H | 1.25228  | 8.89670  | 2.33849  |
| H | 2.32865  | 10.26809 | 2.39737  |
| H | -0.59336 | 10.41201 | 1.47188  |
| H | 0.01430  | 10.94854 | 3.04488  |
| H | 0.52167  | 11.77881 | 1.56838  |
| H | 2.69582  | 10.78300 | -1.06378 |
| H | 2.80334  | 11.48349 | 0.52861  |
| H | 4.50741  | 9.78752  | 1.20771  |
| H | 4.41038  | 9.03615  | -0.38771 |
| H | 5.04616  | 10.68022 | -0.22052 |
| H | -2.31124 | 2.21620  | -5.56365 |
| H | -3.85099 | 2.94362  | -1.75077 |

Molecule 09\_1551552

Cartesian Coordinates (in Angstroms) and Total Electronic Potential Energy (in kcal/mol)

37

c09\_1551552.xyz.out Energy: -598494.2572006

|   |          |          |         |
|---|----------|----------|---------|
| O | 1.41447  | 12.06705 | 4.52285 |
| O | 2.76962  | 13.51839 | 3.58092 |
| O | 4.05371  | 15.34103 | 5.16000 |
| N | -1.59991 | 8.77836  | 6.15152 |
| N | 4.19719  | 14.89868 | 7.31925 |
| C | 2.33746  | 13.07681 | 4.62104 |
| C | 2.69496  | 13.49395 | 5.96706 |
| C | 2.13578  | 12.86459 | 7.04005 |
| C | 1.19874  | 11.81880 | 6.88658 |
| C | 0.57500  | 11.13205 | 7.94322 |
| C | -0.33673 | 10.13692 | 7.70997 |
| C | -0.69188 | 9.76288  | 6.38169 |
| C | -0.06861 | 10.44428 | 5.31772 |
| C | 0.84737  | 11.43713 | 5.58660 |
| C | -1.89167 | 8.29986  | 4.80929 |
| C | -2.97263 | 9.11503  | 4.11943 |
| C | -2.35860 | 8.15342  | 7.22414 |
| C | -1.63865 | 6.96255  | 7.83325 |
| C | 3.65730  | 14.56368 | 6.18444 |
| C | 5.00769  | 15.97782 | 7.02117 |
| C | 4.91829  | 16.24282 | 5.70315 |
| H | 2.41635  | 13.18206 | 8.03882 |
| H | 0.83396  | 11.39844 | 8.96175 |
| H | -0.77290 | 9.62129  | 8.55331 |
| H | -0.29600 | 10.23421 | 4.28239 |
| H | -2.20867 | 7.25796  | 4.90141 |
| H | -0.97412 | 8.28290  | 4.21812 |
| H | -2.67414 | 10.16076 | 4.02226 |
| H | -3.17486 | 8.72211  | 3.12157 |
| H | -3.90187 | 9.08186  | 4.69292 |
| H | -3.31330 | 7.83517  | 6.79764 |
| H | -2.60509 | 8.89615  | 7.98490 |

|   |          |          |         |
|---|----------|----------|---------|
| H | -0.67970 | 7.26137  | 8.26151 |
| H | -2.24098 | 6.50794  | 8.62181 |
| H | -1.44510 | 6.20274  | 7.07270 |
| H | 5.59617  | 16.47896 | 7.77158 |
| H | 5.35940  | 16.96357 | 5.03745 |

Molecule 10\_8102531

Cartesian Coordinates (in Angstroms) and Total Electronic Potential Energy (in kcal/mol)

40

c10\_8102531.xyz.out Energy: -612484.1835615

|   |         |          |          |
|---|---------|----------|----------|
| O | 7.24846 | 14.03988 | 4.73606  |
| O | 8.32696 | 12.41107 | 5.73762  |
| O | 4.58974 | 10.88978 | 7.07297  |
| O | 6.79791 | 10.60651 | 7.25168  |
| N | 5.31940 | 17.69104 | 2.39929  |
| C | 3.64750 | 19.46954 | 2.80455  |
| H | 4.42774 | 20.19767 | 3.03735  |
| H | 2.80643 | 20.00318 | 2.35855  |
| H | 3.31351 | 19.02263 | 3.74330  |
| C | 4.17646 | 18.40915 | 1.85422  |
| H | 4.50601 | 18.87223 | 0.92080  |
| H | 3.39349 | 17.70205 | 1.57618  |
| C | 7.21190 | 17.59123 | 0.80935  |
| H | 6.55293 | 17.74869 | -0.04752 |
| H | 8.18534 | 18.02458 | 0.57397  |
| H | 7.33887 | 16.51529 | 0.94415  |
| C | 6.62631 | 18.23190 | 2.05595  |
| H | 6.49837 | 19.30622 | 1.90254  |
| H | 7.30169 | 18.12813 | 2.90695  |
| C | 3.75656 | 15.01758 | 4.36433  |
| H | 2.76964 | 14.69579 | 4.67761  |
| C | 3.89403 | 16.13411 | 3.58613  |
| H | 3.00970 | 16.68756 | 3.30530  |
| C | 5.18257 | 16.58282 | 3.16882  |
| C | 6.30715 | 15.84058 | 3.58441  |
| H | 7.31419 | 16.10259 | 3.29312  |
| C | 6.13479 | 14.72254 | 4.36862  |
| C | 4.87413 | 14.27144 | 4.78284  |
| C | 4.81756 | 13.11475 | 5.58608  |
| H | 3.84939 | 12.75760 | 5.91765  |
| C | 7.24764 | 12.90151 | 5.51409  |
| C | 5.94282 | 12.43561 | 5.95987  |
| C | 5.86010 | 11.23465 | 6.81270  |
| C | 4.41312 | 9.73642  | 7.90628  |
| H | 4.90031 | 8.88266  | 7.43153  |
| H | 4.90820 | 9.91495  | 8.86274  |
| C | 2.93150 | 9.52160  | 8.06893  |
| H | 2.45627 | 9.35191  | 7.10160  |
| H | 2.75196 | 8.64858  | 8.69755  |
| H | 2.46348 | 10.38678 | 8.54099  |

## Molecule 11\_GLCH169-953

Cartesian Coordinates (in Angstroms) and Total Electronic Potential Energy (in kcal/mol)

40

c11\_GLCH169-953.xyz.out Energy: -654658.1684797

|   |          |          |          |
|---|----------|----------|----------|
| O | 2.04937  | 10.32523 | 3.18230  |
| O | 0.89556  | 10.89872 | 1.39502  |
| N | -3.41409 | 8.57142  | 1.57136  |
| N | -2.33651 | 8.59897  | 2.42760  |
| N | -5.47782 | 8.19557  | 0.95740  |
| N | 4.80783  | 9.31101  | 6.90607  |
| N | -4.77724 | 8.65841  | -0.13157 |
| C | 2.22193  | 9.64048  | 4.34712  |
| C | 3.41025  | 9.82681  | 5.01331  |
| C | -0.13401 | 9.36726  | 2.88834  |
| C | 1.21267  | 8.78248  | 4.81149  |
| C | 0.92335  | 10.23992 | 2.41302  |
| C | 3.65051  | 9.14005  | 6.22200  |
| C | 0.03304  | 8.66777  | 4.05073  |
| C | 2.63455  | 8.26167  | 6.70287  |
| C | -4.64499 | 8.14224  | 1.95652  |
| C | -1.32735 | 9.29805  | 2.06771  |
| C | 5.80040  | 10.29710 | 6.50379  |
| C | 1.46381  | 8.09680  | 6.01550  |
| C | -3.55057 | 8.87972  | 0.24785  |
| C | 5.13093  | 8.54215  | 8.09948  |
| C | 4.59252  | 9.18321  | 9.36684  |
| C | 6.78766  | 9.74994  | 5.48748  |
| H | 0.70065  | 7.43064  | 6.40180  |
| H | 2.77345  | 7.72958  | 7.63276  |
| H | 4.14003  | 10.48889 | 4.56993  |
| H | -0.75945 | 8.01021  | 4.39389  |
| H | -4.85651 | 7.81935  | 2.96261  |
| H | -1.31241 | 9.88186  | 1.14938  |
| H | 6.32759  | 10.60866 | 7.40885  |
| H | 5.29830  | 11.18929 | 6.12519  |
| H | -2.75206 | 9.22214  | -0.38842 |
| H | 6.22042  | 8.47054  | 8.14732  |
| H | 4.76899  | 7.51894  | 7.99016  |
| H | 3.50399  | 9.26265  | 9.33278  |
| H | 4.99980  | 10.18923 | 9.48990  |
| H | 4.86782  | 8.59549  | 10.24418 |
| H | 6.27807  | 9.42692  | 4.57763  |
| H | 7.32240  | 8.89012  | 5.89743  |
| H | 7.52253  | 10.51000 | 5.21723  |

## Molecule 12\_2243765

Cartesian Coordinates (in Angstroms) and Total Electronic Potential Energy (in kcal/mol)

41

c12\_2243765.xyz.out Energy: -636357.0080479

|   |          |          |          |
|---|----------|----------|----------|
| O | 5.75607  | 0.74355  | 0.72286  |
| O | 4.09680  | -0.13809 | -0.40939 |
| O | 2.16235  | 3.63319  | -0.48449 |
| O | 2.06117  | 1.50086  | -1.12997 |
| N | 9.54028  | 2.21439  | 3.17752  |
| C | 4.53517  | 0.86837  | 0.09378  |
| C | 3.94291  | 2.19566  | 0.12368  |
| C | 4.59103  | 3.21345  | 0.76542  |
| H | 4.12266  | 4.19228  | 0.77652  |
| C | 5.83339  | 3.03042  | 1.40095  |
| C | 6.55236  | 4.03370  | 2.07808  |
| H | 6.13401  | 5.03280  | 2.12332  |
| C | 7.76106  | 3.77338  | 2.66258  |
| H | 8.28972  | 4.57807  | 3.15306  |
| C | 8.33810  | 2.46950  | 2.60481  |
| C | 7.62259  | 1.45850  | 1.93112  |
| H | 7.98148  | 0.44138  | 1.86543  |
| C | 6.40851  | 1.75263  | 1.35347  |
| C | 2.65164  | 2.51825  | -0.51498 |
| C | 0.81274  | 1.80051  | -1.77050 |
| H | 0.09812  | 2.16274  | -1.02873 |
| H | 0.98301  | 2.59971  | -2.49744 |
| C | 0.33463  | 0.55462  | -2.43254 |
| H | 1.04520  | 0.06325  | -3.09072 |
| C | -0.88786 | 0.06995  | -2.26720 |
| H | -1.60002 | 0.54986  | -1.60330 |
| H | -1.22192 | -0.81829 | -2.78953 |
| C | 10.21647 | 0.93599  | 3.01321  |
| H | 10.04177 | 0.55600  | 2.00502  |
| H | 11.28984 | 1.13124  | 3.08003  |
| C | 9.80490  | -0.08275 | 4.06215  |
| H | 8.73364  | -0.28748 | 4.01211  |
| H | 10.34044 | -1.02241 | 3.91697  |
| H | 10.03152 | 0.28663  | 5.06494  |
| C | 10.24150 | 3.19839  | 3.98912  |
| H | 9.52220  | 3.77504  | 4.57277  |
| H | 10.84083 | 2.64442  | 4.71609  |
| C | 11.13481 | 4.10721  | 3.16268  |
| H | 10.55316 | 4.66634  | 2.42700  |
| H | 11.65724 | 4.82047  | 3.80253  |
| H | 11.88360 | 3.52166  | 2.62450  |

Molecule 13\_7101415

Cartesian Coordinates (in Angstroms) and Total Electronic Potential Energy (in kcal/mol)

47

c13\_7101415.xyz.out Energy: -649263.5483209

|   |          |          |          |
|---|----------|----------|----------|
| O | 12.91204 | -1.36803 | 12.18651 |
| C | 13.28429 | -2.37866 | 11.35543 |
| C | 13.58125 | -2.04803 | 9.96966  |

|   |          |          |          |
|---|----------|----------|----------|
| C | 13.51256 | -0.74672 | 9.53476  |
| C | 13.08930 | 0.27310  | 10.45321 |
| C | 12.93117 | 1.63484  | 10.13289 |
| H | 13.12616 | 1.97198  | 9.12252  |
| C | 12.51524 | 2.56006  | 11.05661 |
| H | 12.39053 | 3.58633  | 10.74123 |
| C | 12.22516 | 2.18402  | 12.39603 |
| C | 12.37483 | 0.82694  | 12.72973 |
| H | 12.19661 | 0.45070  | 13.72726 |
| C | 12.78894 | -0.07680 | 11.77388 |
| O | 13.34257 | -3.49137 | 11.83948 |
| C | 13.98083 | -3.21427 | 9.18582  |
| H | 14.37039 | -4.07041 | 9.73440  |
| N | 13.86077 | -3.28384 | 7.91831  |
| O | 14.33731 | -4.49374 | 7.44176  |
| C | 13.84127 | -0.35407 | 8.12841  |
| H | 14.32533 | 0.62599  | 8.12464  |
| H | 14.54608 | -1.07038 | 7.70938  |
| C | 12.57996 | -0.29874 | 7.25973  |
| H | 12.07458 | -1.26867 | 7.30834  |
| H | 11.89064 | 0.43827  | 7.68446  |
| C | 12.88052 | 0.04927  | 5.80605  |
| H | 11.93770 | 0.25757  | 5.29248  |
| H | 13.46264 | 0.97713  | 5.76937  |
| C | 13.61848 | -1.05452 | 5.06132  |
| H | 13.78397 | -0.78232 | 4.01694  |
| H | 13.03944 | -1.98177 | 5.07789  |
| H | 14.59469 | -1.26568 | 5.50320  |
| N | 11.81456 | 3.09961  | 13.31506 |
| C | 11.39189 | 2.70684  | 14.64931 |
| H | 10.66836 | 3.45112  | 14.99213 |
| H | 10.84752 | 1.76179  | 14.59684 |
| C | 12.54990 | 2.61532  | 15.62898 |
| H | 12.19590 | 2.32694  | 16.62034 |
| H | 13.05553 | 3.57990  | 15.71549 |
| H | 13.28474 | 1.87796  | 15.29960 |
| C | 11.78352 | 4.52479  | 13.02958 |
| H | 11.94551 | 5.04573  | 13.97695 |
| H | 12.62944 | 4.79241  | 12.39366 |
| C | 10.47029 | 4.97056  | 12.40894 |
| H | 10.47438 | 6.04618  | 12.22302 |
| H | 9.63566  | 4.74407  | 13.07638 |
| H | 10.29112 | 4.45797  | 11.46150 |
| H | 14.18210 | -4.46105 | 6.48784  |

Molecule 14\_4517186

Cartesian Coordinates (in Angstroms) and Total Electronic Potential Energy (in kcal/mol)

46

c14\_4517186.xyz.out Energy: -898352.2506032

|   |         |          |         |
|---|---------|----------|---------|
| S | 4.65603 | 16.11681 | 2.90600 |
|---|---------|----------|---------|

|   |         |          |         |
|---|---------|----------|---------|
| C | 4.90271 | 11.86360 | 4.41697 |
| C | 3.77092 | 11.46025 | 5.13388 |
| C | 5.74709 | 10.84778 | 3.93697 |
| H | 6.63434 | 11.12828 | 3.38052 |
| C | 3.46688 | 10.13886 | 5.37738 |
| H | 2.55634 | 9.92026  | 5.91695 |
| C | 4.32077 | 9.12681  | 4.89663 |
| C | 5.47597 | 9.52427  | 4.16431 |
| H | 6.16474 | 8.77976  | 3.79180 |
| O | 2.90681 | 12.39710 | 5.61487 |
| C | 5.11176 | 13.25080 | 4.22660 |
| H | 5.96957 | 13.58259 | 3.65036 |
| C | 4.26554 | 14.17961 | 4.74742 |
| C | 3.08166 | 13.74487 | 5.46526 |
| C | 4.45097 | 15.62944 | 4.48046 |
| N | 4.44066 | 16.45902 | 5.52974 |
| C | 4.59143 | 16.04727 | 6.92295 |
| H | 4.50427 | 14.96984 | 7.02785 |
| H | 5.59680 | 16.34007 | 7.24893 |
| C | 3.57477 | 16.75757 | 7.79322 |
| H | 3.73888 | 16.50268 | 8.84012 |
| H | 2.56127 | 16.45697 | 7.50304 |
| C | 3.49507 | 18.54876 | 6.32952 |
| H | 2.47688 | 18.26672 | 6.02953 |
| H | 3.58828 | 19.63360 | 6.28292 |
| O | 3.72075 | 18.15786 | 7.66775 |
| C | 4.49525 | 17.90723 | 5.38720 |
| H | 5.50849 | 18.25183 | 5.62290 |
| H | 4.27086 | 18.17333 | 4.35688 |
| N | 4.05339 | 7.81397  | 5.12551 |
| C | 4.85079 | 6.74488  | 4.54446 |
| H | 5.15758 | 7.01931  | 3.53365 |
| H | 4.19325 | 5.87897  | 4.43203 |
| C | 2.95228 | 7.39389  | 5.97771 |
| H | 2.85524 | 8.08469  | 6.81766 |
| H | 3.23015 | 6.43009  | 6.41206 |
| O | 2.22581 | 14.46555 | 5.93502 |
| C | 6.05077 | 6.37994  | 5.40192 |
| H | 6.61937 | 5.56690  | 4.94702 |
| H | 6.71614 | 7.23648  | 5.52903 |
| H | 5.72727 | 6.05544  | 6.39368 |
| C | 1.64114 | 7.26567  | 5.22070 |
| H | 1.73326 | 6.52963  | 4.41872 |
| H | 0.83990 | 6.94293  | 5.88775 |
| H | 1.35123 | 8.21762  | 4.77168 |

Molecule 15\_2003249

Cartesian Coordinates (in Angstroms) and Total Electronic Potential Energy (in kcal/mol)

43

c15\_2003249.xyz.out Energy: -897466.6483784

|   |          |          |          |
|---|----------|----------|----------|
| S | 4.06057  | 6.24092  | -4.28648 |
| O | 7.49161  | 3.71886  | -2.85189 |
| O | 5.81485  | 4.09914  | -4.22505 |
| N | 4.87265  | 7.72971  | -2.34704 |
| N | 11.20083 | 2.58326  | -0.10527 |
| C | 6.45564  | 4.49998  | -3.27584 |
| C | 5.12228  | 6.60974  | -2.96043 |
| C | 6.21605  | 5.73352  | -2.55470 |
| C | 7.01962  | 6.05916  | -1.50025 |
| C | 3.27198  | 9.60262  | -2.48413 |
| C | 8.94737  | 5.48597  | -0.01607 |
| C | 2.18302  | 10.12603 | -3.15203 |
| C | 9.95377  | 4.62104  | 0.32125  |
| C | 1.60575  | 9.44837  | -4.23644 |
| C | 10.17249 | 3.42091  | -0.41606 |
| C | 2.11176  | 8.23610  | -4.66800 |
| C | 9.30165  | 3.14486  | -1.48893 |
| C | 3.21174  | 7.70697  | -3.99457 |
| C | 8.29935  | 4.03550  | -1.80239 |
| C | 3.79626  | 8.37703  | -2.90777 |
| C | 8.08242  | 5.22326  | -1.09368 |
| C | 11.36551 | 1.31910  | -0.80970 |
| C | 12.01058 | 2.80123  | 1.08636  |
| C | 10.40148 | 0.23197  | -0.35784 |
| C | 11.31234 | 2.42612  | 2.38525  |
| H | 6.83332  | 6.98361  | -0.96436 |
| H | 3.72516  | 10.11735 | -1.64582 |
| H | 8.80327  | 6.39552  | 0.55601  |
| H | 1.76550  | 11.07427 | -2.83615 |
| H | 10.58716 | 4.86626  | 1.16098  |
| H | 0.75165  | 9.88090  | -4.74284 |
| H | 1.66562  | 7.71313  | -5.50495 |
| H | 9.38149  | 2.24928  | -2.08772 |
| H | 12.39458 | 0.99349  | -0.65163 |
| H | 11.26904 | 1.49516  | -1.88346 |
| H | 12.33785 | 3.84314  | 1.11412  |
| H | 10.59675 | -0.06044 | 0.67481  |
| H | 10.50977 | -0.65441 | -0.98575 |
| H | 9.36506  | 0.56908  | -0.42306 |
| H | 11.11011 | 1.35501  | 2.42683  |
| H | 11.94018 | 2.68514  | 3.24004  |
| H | 10.36117 | 2.95158  | 2.49130  |
| H | 12.91746 | 2.20690  | 0.96842  |

Molecule 16\_7054002

Cartesian Coordinates (in Angstroms) and Total Electronic Potential Energy (in kcal/mol)

45

c16\_7054002.xyz.out Energy: -757846.9941980

|   |         |         |         |
|---|---------|---------|---------|
| O | 2.47323 | 5.09224 | 4.58615 |
| N | 3.30377 | 8.86653 | 6.32777 |



|   |          |          |          |
|---|----------|----------|----------|
| F | 5.59189  | 13.26318 | 8.74153  |
| O | 3.98671  | 6.34645  | 5.55073  |
| N | -0.49595 | 2.01684  | 2.51536  |
| C | 1.81435  | 7.29851  | 5.25692  |
| O | 1.14294  | 9.46618  | 5.90408  |
| C | 0.23128  | 5.80271  | 4.18230  |
| C | -0.24603 | 3.24983  | 3.03299  |
| C | 1.02523  | 3.58400  | 3.54217  |
| H | 1.85970  | 2.89843  | 3.51841  |
| C | 0.56508  | 7.03918  | 4.77138  |
| H | -0.18493 | 7.81951  | 4.84882  |
| C | 1.23002  | 4.82506  | 4.10029  |
| C | -1.03071 | 5.46834  | 3.65761  |
| H | -1.82336 | 6.20668  | 3.69830  |
| C | 2.83162  | 6.27286  | 5.16501  |
| C | 2.05410  | 8.64154  | 5.85858  |
| C | 5.15991  | 9.97810  | 7.32100  |
| H | 5.73244  | 9.07558  | 7.13803  |
| C | -1.26845 | 4.24269  | 3.09733  |
| H | -2.25011 | 4.03735  | 2.69638  |
| C | -1.78793 | 1.70025  | 1.92038  |
| H | -2.58253 | 2.04808  | 2.58373  |
| H | -1.87267 | 0.61310  | 1.89881  |
| C | 3.81688  | 10.02399 | 6.93587  |
| C | 5.76585  | 11.06341 | 7.92916  |
| H | 6.80514  | 11.03397 | 8.22968  |
| C | 3.68568  | 12.27726 | 7.78124  |
| H | 3.12798  | 13.18560 | 7.97070  |
| C | 5.01227  | 12.20097 | 8.14988  |
| C | 3.07968  | 11.18568 | 7.17044  |
| H | 2.04318  | 11.23954 | 6.87955  |
| C | 0.58611  | 1.05904  | 2.32549  |
| H | 0.12723  | 0.07958  | 2.18548  |
| H | 1.16883  | 0.98858  | 3.24717  |
| C | -1.97376 | 2.26278  | 0.51937  |
| H | -1.81246 | 3.34262  | 0.50208  |
| H | -2.98625 | 2.06414  | 0.16274  |
| H | -1.27352 | 1.80706  | -0.18198 |
| C | 1.49093  | 1.38009  | 1.14504  |
| H | 0.94459  | 1.31224  | 0.20335  |
| H | 2.32308  | 0.67478  | 1.10534  |
| H | 1.90491  | 2.38721  | 1.22260  |
| H | 3.94934  | 8.08297  | 6.21740  |

Molecule 17\_2210108

Cartesian Coordinates (in Angstroms) and Total Electronic Potential Energy (in kcal/mol)

47

c17\_2210108.xyz.out Energy: -732698.4594264

|   |          |         |         |
|---|----------|---------|---------|
| O | 1.39390  | 9.62834 | 4.63001 |
| O | -0.52313 | 8.80098 | 5.31017 |

|   |          |          |          |
|---|----------|----------|----------|
| O | -4.93535 | 12.64765 | 9.89714  |
| O | -4.88050 | 10.44470 | 10.25984 |
| N | 5.57652  | 11.07971 | 2.88969  |
| C | 0.27283  | 9.70995  | 5.40943  |
| C | 0.13929  | 10.88395 | 6.26312  |
| C | 1.11240  | 11.83362 | 6.22789  |
| C | 2.25771  | 11.71463 | 5.39723  |
| C | 3.29791  | 12.65341 | 5.31371  |
| C | 4.37295  | 12.46133 | 4.48361  |
| C | 4.48402  | 11.29098 | 3.68175  |
| C | 3.43953  | 10.35021 | 3.75432  |
| C | 2.37197  | 10.57544 | 4.59754  |
| C | -1.05014 | 11.01888 | 7.12500  |
| C | -1.60292 | 9.92160  | 7.79346  |
| C | -2.69274 | 10.08286 | 8.63217  |
| C | -3.25612 | 11.34437 | 8.81501  |
| C | -2.71735 | 12.44277 | 8.14953  |
| C | -1.62899 | 12.27922 | 7.31212  |
| C | -4.42559 | 11.56428 | 9.69560  |
| C | -6.01121 | 10.59948 | 11.11500 |
| C | 5.63839  | 9.91806  | 2.01489  |
| C | 4.80114  | 10.04860 | 0.75076  |
| C | 6.56951  | 12.12694 | 2.69496  |
| C | 6.10650  | 13.26076 | 1.79140  |
| H | 1.03109  | 12.70604 | 6.86938  |
| H | 3.24189  | 13.55086 | 5.91967  |
| H | 5.14372  | 13.21734 | 4.45130  |
| H | 3.43172  | 9.44360  | 3.16674  |
| H | -1.16931 | 8.93994  | 7.66139  |
| H | -3.10769 | 9.22802  | 9.14987  |
| H | -3.17087 | 13.41648 | 8.28812  |
| H | -1.23422 | 13.13305 | 6.77371  |
| H | -6.25044 | 9.60521  | 11.48201 |
| H | -5.77128 | 11.26233 | 11.94629 |
| H | -6.85385 | 11.01090 | 10.55953 |
| H | 6.68652  | 9.76546  | 1.75294  |
| H | 5.33999  | 9.03239  | 2.58058  |
| H | 3.76429  | 10.29682 | 0.98627  |
| H | 4.80649  | 9.10949  | 0.19408  |
| H | 5.19450  | 10.82887 | 0.09768  |
| H | 6.87894  | 12.51698 | 3.66774  |
| H | 7.45510  | 11.65300 | 2.26918  |
| H | 6.86085  | 14.04935 | 1.75657  |
| H | 5.93961  | 12.90825 | 0.77278  |
| H | 5.17384  | 13.69931 | 2.15186  |

Molecule 18\_7117322

Cartesian Coordinates (in Angstroms) and Total Electronic Potential Energy (in kcal/mol)

47

c18\_7117322.xyz.out Energy: -730279.4689324

|   |          |          |          |
|---|----------|----------|----------|
| O | 5.70671  | 8.93578  | 19.07373 |
| O | 2.10177  | 8.54208  | 21.25326 |
| O | 1.73336  | 6.60841  | 20.29146 |
| N | 0.57371  | 2.36293  | 18.50470 |
| N | 4.33996  | 9.94564  | 20.57565 |
| H | 3.52779  | 9.83457  | 21.18198 |
| N | 5.19306  | 11.01168 | 20.73929 |
| H | 4.78256  | 11.90830 | 20.51363 |
| C | 6.52702  | 9.79539  | 22.37401 |
| H | 6.09474  | 8.85578  | 22.05273 |
| C | 7.48682  | 9.81523  | 23.37799 |
| H | 7.78770  | 8.88040  | 23.83632 |
| C | 8.06378  | 11.00812 | 23.79356 |
| H | 8.81176  | 11.01427 | 24.57628 |
| C | 7.66645  | 12.19572 | 23.18670 |
| H | 8.10419  | 13.13725 | 23.49710 |
| C | 6.70807  | 12.19094 | 22.18684 |
| H | 6.39901  | 13.11850 | 21.71605 |
| C | 6.12807  | 10.98875 | 21.77353 |
| C | 4.67780  | 8.93244  | 19.73931 |
| C | 3.72702  | 7.78724  | 19.67216 |
| C | 2.51171  | 7.71752  | 20.45529 |
| C | 2.03342  | 5.58054  | 19.45155 |
| C | 3.20578  | 5.63021  | 18.68777 |
| C | 4.03601  | 6.76126  | 18.82666 |
| H | 4.95262  | 6.83181  | 18.24999 |
| C | 3.45625  | 4.54003  | 17.83397 |
| H | 4.35447  | 4.55022  | 17.22721 |
| C | 2.59320  | 3.48094  | 17.75701 |
| H | 2.82757  | 2.66894  | 17.08451 |
| C | 1.40822  | 3.43626  | 18.55026 |
| C | 1.14429  | 4.53129  | 19.39759 |
| H | 0.25972  | 4.58828  | 20.01482 |
| C | -0.66517 | 2.35475  | 19.27113 |
| H | -0.45677 | 2.70429  | 20.28472 |
| H | -0.97576 | 1.31389  | 19.37071 |
| C | -1.78373 | 3.17250  | 18.64298 |
| H | -1.46439 | 4.19838  | 18.44887 |
| H | -2.10685 | 2.73490  | 17.69747 |
| H | -2.64669 | 3.20671  | 19.31061 |
| C | 0.76611  | 1.30375  | 17.52198 |
| H | 1.80771  | 0.97535  | 17.54406 |
| H | 0.17659  | 0.44888  | 17.85523 |
| C | 0.35911  | 1.69454  | 16.10914 |
| H | -0.71254 | 1.88839  | 16.04867 |
| H | 0.88224  | 2.59456  | 15.78005 |
| H | 0.59732  | 0.88940  | 15.41146 |

Molecule 19\_7225474

Cartesian Coordinates (in Angstroms) and Total Electronic Potential Energy (in kcal/mol)

47

c19\_7225474.xyz.out Energy: -740931.3450679

|   |          |          |          |
|---|----------|----------|----------|
| C | 1.64237  | 20.04384 | 5.10643  |
| C | 3.02305  | 20.27461 | 5.48191  |
| C | 4.04448  | 19.82422 | 4.71485  |
| H | 5.06762  | 20.00776 | 5.02207  |
| C | 4.76879  | 18.61682 | 2.64559  |
| H | 5.81208  | 18.77359 | 2.89478  |
| C | 4.43665  | 17.93248 | 1.50519  |
| H | 5.23212  | 17.55810 | 0.87783  |
| C | 3.07648  | 17.71249 | 1.14622  |
| C | 2.08515  | 18.20484 | 2.01699  |
| H | 1.02941  | 18.06921 | 1.83240  |
| C | 2.55468  | 21.08549 | 7.80708  |
| H | 1.63427  | 20.54825 | 7.94570  |
| C | 3.28726  | 21.91631 | 8.61966  |
| C | 3.02099  | 22.35993 | 9.98943  |
| C | 3.99086  | 23.06326 | 10.70508 |
| H | 4.94223  | 23.27895 | 10.23476 |
| C | 3.73897  | 23.47986 | 12.00446 |
| H | 4.50052  | 24.02487 | 12.54925 |
| C | 2.51832  | 23.19951 | 12.60748 |
| H | 2.32359  | 23.52530 | 13.62198 |
| C | 1.54743  | 22.50024 | 11.89931 |
| H | 0.59130  | 22.28158 | 12.35935 |
| C | 1.79582  | 22.08493 | 10.59948 |
| H | 1.02886  | 21.55110 | 10.04931 |
| C | 3.77207  | 16.46778 | -0.85107 |
| H | 3.32551  | 16.30457 | -1.83299 |
| H | 4.57594  | 17.19079 | -1.00648 |
| C | 4.32905  | 15.15883 | -0.31107 |
| H | 4.70930  | 15.27957 | 0.70540  |
| H | 3.56208  | 14.38339 | -0.29285 |
| H | 5.14888  | 14.80758 | -0.94074 |
| C | 1.35709  | 16.73836 | -0.29840 |
| H | 0.73950  | 17.62565 | -0.13951 |
| H | 1.29398  | 16.51725 | -1.36456 |
| C | 0.81816  | 15.56482 | 0.50668  |
| H | 0.94456  | 15.72658 | 1.57894  |
| H | -0.24668 | 15.42835 | 0.30865  |
| H | 1.33189  | 14.63944 | 0.24286  |
| C | 3.78455  | 19.12179 | 3.51069  |
| C | 2.45293  | 18.88988 | 3.15403  |
| N | 3.26451  | 21.02218 | 6.65686  |
| N | 4.37364  | 21.77339 | 6.74720  |
| N | 4.39047  | 22.30733 | 7.92252  |
| N | 2.74593  | 17.06675 | -0.00868 |
| O | 1.44642  | 19.34438 | 3.95682  |
| O | 0.66493  | 20.41039 | 5.72220  |

Molecule 20\_4127666

Cartesian Coordinates (in Angstroms) and Total Electronic Potential Energy (in kcal/mol)

48

c20\_4127666.xyz.out Energy: -1039734.2751926

|   |         |          |          |
|---|---------|----------|----------|
| S | 5.96521 | 11.35102 | 5.50111  |
| O | 5.46073 | 9.13968  | 1.15655  |
| C | 5.74592 | 10.24063 | 0.40130  |
| O | 5.41617 | 8.00017  | 3.03779  |
| C | 6.36705 | 11.33954 | 0.99555  |
| N | 5.34418 | 11.29505 | -3.08609 |
| C | 5.69851 | 11.28775 | -1.76663 |
| O | 7.90586 | 8.23895  | 4.67332  |
| H | 7.55336 | 7.61382  | 4.02129  |
| C | 5.41438 | 10.18823 | -0.93605 |
| H | 4.95150 | 9.28407  | -1.30417 |
| C | 6.35015 | 12.40703 | -1.17716 |
| H | 6.59698 | 13.26933 | -1.77930 |
| C | 6.66426 | 12.42626 | 0.15763  |
| H | 7.14923 | 13.29662 | 0.58466  |
| C | 6.30187 | 10.20385 | 3.13097  |
| C | 6.66067 | 11.28037 | 2.38397  |
| H | 7.16665 | 12.11568 | 2.85269  |
| N | 6.52611 | 10.15297 | 4.52645  |
| C | 5.69450 | 9.05064  | 2.49004  |
| C | 4.70126 | 10.13515 | -3.68418 |
| H | 3.93408 | 9.76553  | -3.00066 |
| H | 4.16851 | 10.48104 | -4.57167 |
| C | 5.84921 | 12.32211 | -3.98734 |
| H | 5.27186 | 12.24592 | -4.90984 |
| H | 5.62672 | 13.31021 | -3.57629 |
| O | 6.52390 | 12.61374 | 5.11952  |
| C | 7.16761 | 9.38951  | 6.64356  |
| C | 6.83757 | 8.91083  | 5.25914  |
| H | 5.95969 | 8.26217  | 5.28994  |
| O | 4.53757 | 11.30697 | 5.62760  |
| C | 6.73403 | 10.67428 | 6.90633  |
| C | 5.66471 | 9.01866  | -4.05975 |
| H | 5.11397 | 8.13670  | -4.39253 |
| H | 6.28568 | 8.73117  | -3.20859 |
| H | 6.32536 | 9.32765  | -4.87117 |
| C | 7.81539 | 8.66952  | 7.63329  |
| H | 8.17429 | 7.66740  | 7.43412  |
| C | 7.55037 | 10.56673 | 9.12285  |
| H | 7.71168 | 11.01274 | 10.09588 |
| C | 6.90275 | 11.29320 | 8.13331  |
| H | 6.55603 | 12.30432 | 8.30560  |
| C | 7.33418 | 12.19948 | -4.29737 |
| H | 7.65831 | 13.03084 | -4.92654 |
| H | 7.54980 | 11.27012 | -4.82619 |
| H | 7.93400 | 12.21253 | -3.38532 |
| C | 8.00414 | 9.27171  | 8.87171  |

H 8.51642 8.72849 9.65601

Molecule 21\_7054003

Cartesian Coordinates (in Angstroms) and Total Electronic Potential Energy (in kcal/mol)

51

c21\_7054003.xyz.out Energy: -838497.4306606

|   |          |          |          |
|---|----------|----------|----------|
| O | 0.31048  | 7.71851  | 11.58954 |
| O | 5.74688  | 13.05094 | 14.88085 |
| O | 7.35557  | 11.57179 | 15.34296 |
| O | 3.91141  | 5.92907  | 12.91384 |
| N | 2.78202  | 7.90447  | 12.71722 |
| N | -2.36077 | 1.71026  | 9.38293  |
| O | -0.40769 | 5.75697  | 10.93172 |
| C | 0.56182  | 6.52807  | 11.49980 |
| C | -1.36965 | 3.77534  | 10.15077 |
| H | -2.21465 | 4.37901  | 9.85341  |
| C | -0.30571 | 4.41202  | 10.74802 |
| C | 0.90573  | 2.35625  | 10.93068 |
| H | 1.79130  | 1.81072  | 11.23573 |
| C | 1.88074  | 4.50781  | 11.74900 |
| H | 2.79432  | 4.02215  | 12.07611 |
| C | 0.85570  | 3.74484  | 11.15646 |
| C | 1.76965  | 5.85715  | 11.93006 |
| C | -1.31622 | 2.38315  | 9.93580  |
| C | 3.68376  | 8.81775  | 13.26799 |
| C | 2.91874  | 6.56044  | 12.56484 |
| C | 5.33879  | 10.80334 | 14.32758 |
| C | 4.95081  | 8.48294  | 13.75659 |
| H | 5.29384  | 7.46174  | 13.72565 |
| C | -3.56434 | 2.41769  | 8.96703  |
| H | -4.37772 | 1.69076  | 8.94931  |
| H | -3.83002 | 3.14386  | 9.73772  |
| C | 6.25183  | 11.81417 | 14.89755 |
| C | 3.25903  | 10.15216 | 13.31591 |
| H | 2.27593  | 10.40567 | 12.93496 |
| C | -2.21886 | 0.32131  | 8.96033  |
| H | -1.83484 | -0.27622 | 9.79069  |
| H | -3.22371 | -0.05319 | 8.76228  |
| C | 5.76022  | 9.47779  | 14.27935 |
| H | 6.74339  | 9.22891  | 14.65986 |
| C | -0.13363 | 1.69353  | 10.33831 |
| H | -0.05184 | 0.62744  | 10.18664 |
| C | 4.07439  | 11.13442 | 13.83836 |
| H | 3.73304  | 12.16070 | 13.86912 |
| C | 6.58808  | 14.06752 | 15.42014 |
| H | 7.52134  | 14.12636 | 14.86011 |
| H | 6.03447  | 14.99807 | 15.32861 |
| H | 6.81086  | 13.86188 | 16.46712 |
| C | -3.44119 | 3.09472  | 7.61045  |
| H | -3.33590 | 2.35817  | 6.81254  |

|   |          |          |          |
|---|----------|----------|----------|
| H | -4.33207 | 3.69013  | 7.40231  |
| H | -2.57359 | 3.75712  | 7.57689  |
| C | -1.34856 | 0.13983  | 7.72566  |
| H | -0.35176 | 0.55936  | 7.87423  |
| H | -1.23785 | -0.92174 | 7.49658  |
| H | -1.79230 | 0.62963  | 6.85801  |
| H | 1.89348  | 8.28232  | 12.38245 |

Molecule 22\_7054005

Cartesian Coordinates (in Angstroms) and Total Electronic Potential Energy (in kcal/mol)

47

c22\_7054005.xyz.out Energy: -823846.5848718

|   |          |          |          |
|---|----------|----------|----------|
| O | 4.64569  | 10.18661 | -0.15971 |
| N | 1.29421  | 9.68716  | -2.69779 |
| O | 2.99933  | 11.18154 | -1.20662 |
| O | 1.72784  | 7.44418  | -2.72328 |
| N | 8.36601  | 8.44867  | 2.23179  |
| N | -3.25576 | 10.36339 | -5.89465 |
| O | -3.74283 | 9.39331  | -6.45137 |
| O | -3.70571 | 11.49340 | -5.99329 |
| C | 3.17292  | 8.81206  | -1.45726 |
| C | 5.03571  | 7.83316  | -0.24729 |
| C | 3.91159  | 7.72314  | -1.08645 |
| H | 3.60973  | 6.74962  | -1.45873 |
| C | 7.27057  | 8.25867  | 1.45051  |
| C | 6.46478  | 9.33984  | 1.03805  |
| H | 6.64588  | 10.35597 | 1.35667  |
| C | 5.83769  | 6.75670  | 0.17877  |
| H | 5.58957  | 5.75723  | -0.15953 |
| C | 5.39006  | 9.10881  | 0.21091  |
| C | 2.00572  | 8.57765  | -2.34795 |
| C | 3.55339  | 10.12012 | -0.97052 |
| C | 0.16451  | 9.77592  | -3.50470 |
| C | 6.91202  | 6.95190  | 1.00132  |
| H | 7.50158  | 6.09720  | 1.29895  |
| C | -0.39447 | 11.05538 | -3.64616 |
| H | 0.06538  | 11.89034 | -3.13082 |
| C | -1.54519 | 8.89071  | -4.94756 |
| H | -2.00991 | 8.06283  | -5.46467 |
| C | -1.51198 | 11.25689 | -4.42514 |
| H | -1.94730 | 12.23978 | -4.53739 |
| C | -2.07687 | 10.16413 | -5.06971 |
| C | -0.42200 | 8.68919  | -4.16505 |
| H | -0.00196 | 7.70195  | -4.06694 |
| C | 9.04570  | 7.32058  | 2.85998  |
| H | 9.32856  | 6.59107  | 2.09692  |
| H | 9.98084  | 7.70469  | 3.26846  |
| C | 8.74759  | 9.78451  | 2.67006  |
| H | 9.81989  | 9.76542  | 2.87193  |
| H | 8.61237  | 10.47949 | 1.83966  |

|   |         |          |          |
|---|---------|----------|----------|
| C | 7.99304 | 10.26204 | 3.90099  |
| H | 8.25089 | 9.66255  | 4.77553  |
| H | 8.24411 | 11.30133 | 4.12056  |
| H | 6.91328 | 10.19630 | 3.75027  |
| C | 8.23842 | 6.65464  | 3.96406  |
| H | 7.27452 | 6.29779  | 3.59692  |
| H | 8.78487 | 5.79859  | 4.36414  |
| H | 8.04798 | 7.34949  | 4.78301  |
| H | 1.64721 | 10.55986 | -2.29744 |

Molecule 23\_4027127

Cartesian Coordinates (in Angstroms) and Total Electronic Potential Energy (in kcal/mol)

49

c23\_4027127.xyz.out Energy: -788743.9153665

|   |          |          |         |
|---|----------|----------|---------|
| O | 2.56914  | 10.33096 | 2.07262 |
| O | 4.42632  | 9.64612  | 1.11935 |
| N | 3.99803  | 5.42117  | 5.66817 |
| N | 2.70370  | 7.31088  | 4.91791 |
| N | 5.16765  | 4.81353  | 5.31326 |
| N | -1.44851 | 12.12944 | 3.83618 |
| C | 3.98338  | 4.42595  | 7.87282 |
| H | 5.06351  | 4.38083  | 7.83160 |
| C | 3.28971  | 3.95877  | 8.97917 |
| H | 3.83878  | 3.54284  | 9.81492 |
| C | 1.90221  | 4.03063  | 9.02159 |
| H | 1.36455  | 3.66938  | 9.88939 |
| C | 1.20888  | 4.56349  | 7.94231 |
| H | 0.12707  | 4.61219  | 7.96181 |
| C | 1.89004  | 5.02349  | 6.82338 |
| H | 1.35187  | 5.41873  | 5.97347 |
| C | 3.27898  | 4.95913  | 6.79849 |
| C | 3.73115  | 6.47397  | 4.84250 |
| C | 2.68163  | 8.27519  | 3.99699 |
| C | 1.60463  | 9.23754  | 3.99757 |
| C | 0.55032  | 9.23862  | 4.92045 |
| H | 0.54303  | 8.47862  | 5.69221 |
| C | -0.45181 | 10.17658 | 4.87643 |
| H | -1.22903 | 10.14212 | 5.62670 |
| C | -0.45986 | 11.19279 | 3.88468 |
| C | 0.59608  | 11.19720 | 2.95562 |
| H | 0.65930  | 11.92002 | 2.15460 |
| C | 1.58713  | 10.24071 | 3.03091 |
| C | 3.61488  | 9.47407  | 2.00053 |
| C | 3.68270  | 8.40447  | 2.99689 |
| C | 4.75190  | 7.52358  | 2.94691 |
| H | 5.51294  | 7.64077  | 2.18509 |
| C | 4.78740  | 6.52245  | 3.90369 |
| C | 5.64174  | 5.44629  | 4.27327 |
| H | 6.56402  | 5.12626  | 3.81341 |
| C | -2.61395 | 12.06804 | 4.70251 |



|   |          |          |         |
|---|----------|----------|---------|
| H | -2.91022 | 11.02749 | 4.84784 |
| H | -3.44050 | 12.54180 | 4.16611 |
| C | -2.39346 | 12.76338 | 6.03564 |
| H | -3.29191 | 12.71179 | 6.65349 |
| H | -2.14702 | 13.81649 | 5.88166 |
| H | -1.57035 | 12.30303 | 6.58608 |
| C | -1.39910 | 13.24636 | 2.90774 |
| H | -0.36879 | 13.59433 | 2.80733 |
| H | -1.95076 | 14.07246 | 3.36431 |
| C | -1.99545 | 12.91004 | 1.55093 |
| H | -1.94948 | 13.77194 | 0.88279 |
| H | -3.04258 | 12.61664 | 1.65592 |
| H | -1.46005 | 12.08283 | 1.08066 |

Molecule 24\_7023327

Cartesian Coordinates (in Angstroms) and Total Electronic Potential Energy (in kcal/mol)

50

c24\_7023327.xyz.out Energy: -788865.6297638

|   |          |          |          |
|---|----------|----------|----------|
| O | 2.43250  | 10.03088 | 7.12813  |
| O | 3.68875  | 9.09227  | 5.59206  |
| N | 5.48827  | 10.95936 | 4.37898  |
| N | 6.36300  | 11.16723 | 3.36020  |
| H | 6.16570  | 11.85849 | 2.64372  |
| C | 3.47994  | 11.47254 | 5.50398  |
| C | 3.25622  | 10.12911 | 6.03339  |
| C | 1.93447  | 12.36265 | 7.16113  |
| C | 0.98259  | 10.81256 | 8.78709  |
| H | 0.90810  | 9.78629  | 9.11743  |
| N | -0.52620 | 11.62654 | 10.48329 |
| C | 7.57699  | 10.54346 | 3.35619  |
| C | 2.80256  | 12.51826 | 6.05015  |
| H | 2.94312  | 13.51902 | 5.65213  |
| O | 7.96973  | 9.81324  | 4.24724  |
| C | 0.27289  | 11.85883 | 9.40685  |
| C | 1.78364  | 11.08093 | 7.69815  |
| C | 4.42234  | 11.67256 | 4.38934  |
| C | 8.42874  | 10.84720 | 2.16169  |
| C | 0.42045  | 13.16937 | 8.87096  |
| H | -0.08762 | 14.00412 | 9.33222  |
| C | 1.22555  | 13.40172 | 7.78539  |
| H | 1.33071  | 14.41017 | 7.40054  |
| C | -1.37520 | 12.65774 | 11.05760 |
| H | -2.24093 | 12.15409 | 11.49565 |
| H | -1.77080 | 13.29523 | 10.26472 |
| C | 7.92026  | 11.19323 | 0.91469  |
| H | 6.85548  | 11.24277 | 0.72097  |
| C | 9.80655  | 10.74795 | 2.30808  |
| H | 10.23001 | 10.46329 | 3.26250  |
| N | 10.13521 | 11.36291 | 0.01690  |
| C | -0.66231 | 13.48112 | 12.11699 |

|   |          |          |          |
|---|----------|----------|----------|
| H | -0.31445 | 12.83915 | 12.92957 |
| H | -1.33211 | 14.23194 | 12.54021 |
| H | 0.20677  | 13.99177 | 11.69704 |
| C | 10.61328 | 11.02140 | 1.21539  |
| H | 11.69211 | 10.96219 | 1.30671  |
| C | 8.81196  | 11.43646 | -0.12035 |
| H | 8.44009  | 11.69731 | -1.10516 |
| C | -0.59110 | 10.32280 | 11.12402 |
| H | -0.83766 | 10.49240 | 12.17547 |
| H | 0.39872  | 9.86222  | 11.11872 |
| C | 4.11946  | 12.71782 | 3.35360  |
| H | 4.84098  | 13.53915 | 3.39408  |
| H | 3.12158  | 13.13015 | 3.47846  |
| H | 4.16248  | 12.28321 | 2.35063  |
| C | -1.62346 | 9.40723  | 10.48772 |
| H | -1.65283 | 8.44359  | 10.99925 |
| H | -1.39507 | 9.22952  | 9.43493  |
| H | -2.61885 | 9.85376  | 10.54623 |

Molecule 25\_7116652

Cartesian Coordinates (in Angstroms) and Total Electronic Potential Energy (in kcal/mol)

52

c25\_7116652.xyz.out Energy: -1303545.8363131

|   |          |          |          |
|---|----------|----------|----------|
| S | -0.96929 | 10.77068 | 3.44752  |
| S | 1.24080  | 12.66698 | 3.02632  |
| N | 4.85640  | 5.26769  | 0.06580  |
| O | -0.80989 | 9.22161  | 0.87735  |
| O | 1.03629  | 8.02649  | 0.68849  |
| O | -1.46306 | 10.01462 | 6.25733  |
| O | 0.07817  | 11.36004 | 7.16912  |
| O | 1.62057  | 9.76239  | 5.25891  |
| O | 3.28520  | 11.21586 | 4.91937  |
| C | -0.37822 | 11.68475 | 4.89054  |
| H | -0.94297 | 12.61614 | 4.98661  |
| C | 1.08676  | 12.04951 | 4.70759  |
| H | 1.37670  | 12.86617 | 5.37209  |
| C | 0.31547  | 11.32849 | 2.26981  |
| H | -0.21170 | 11.75805 | 1.41545  |
| C | 1.14569  | 10.16354 | 1.80149  |
| C | 0.37847  | 9.13998  | 1.11224  |
| C | 2.37939  | 7.84707  | 0.85232  |
| C | 3.14336  | 8.84089  | 1.46872  |
| C | 2.48240  | 10.01408 | 1.93551  |
| H | 3.07836  | 10.79581 | 2.39787  |
| C | 2.91608  | 6.66580  | 0.38543  |
| H | 2.24233  | 5.94466  | -0.05480 |
| C | 4.29589  | 6.42436  | 0.51826  |
| C | 5.08703  | 7.43232  | 1.13474  |
| H | 6.15501  | 7.29987  | 1.23305  |
| C | 4.51920  | 8.59595  | 1.59083  |

|   |          |          |          |
|---|----------|----------|----------|
| H | 5.14436  | 9.35514  | 2.04972  |
| C | -0.64963 | 10.89742 | 6.15228  |
| C | -0.08301 | 10.65682 | 8.40268  |
| H | -1.11489 | 10.72344 | 8.74588  |
| H | 0.58458  | 11.13549 | 9.11357  |
| H | 0.18907  | 9.60972  | 8.26853  |
| C | 2.00321  | 10.87595 | 4.98917  |
| C | 4.21321  | 10.15123 | 5.14396  |
| H | 4.14054  | 9.80142  | 6.17359  |
| H | 5.19972  | 10.56519 | 4.95458  |
| H | 4.00541  | 9.31914  | 4.46970  |
| C | 6.24803  | 4.93125  | 0.31636  |
| H | 6.31402  | 3.84064  | 0.35452  |
| H | 6.54049  | 5.28143  | 1.30823  |
| C | 7.18511  | 5.47053  | -0.75135 |
| H | 6.91473  | 5.07393  | -1.73266 |
| H | 8.21762  | 5.18452  | -0.54215 |
| H | 7.13385  | 6.56010  | -0.80422 |
| C | 4.08707  | 4.28343  | -0.67741 |
| H | 4.78536  | 3.75540  | -1.33241 |
| H | 3.38282  | 4.79218  | -1.33890 |
| C | 3.37018  | 3.29318  | 0.22542  |
| H | 4.08869  | 2.74993  | 0.84369  |
| H | 2.81139  | 2.56505  | -0.36523 |
| H | 2.67135  | 3.80302  | 0.89153  |

Molecule 26\_4027133

Cartesian Coordinates (in Angstroms) and Total Electronic Potential Energy (in kcal/mol)

55

c26\_4027133.xyz.out Energy: -838037.0646074

|   |          |         |          |
|---|----------|---------|----------|
| O | 0.40316  | 3.55807 | -1.60912 |
| O | 0.65228  | 3.68751 | -3.77402 |
| N | 5.27435  | 7.58848 | -0.46994 |
| N | 5.37715  | 7.25743 | -1.77127 |
| N | 4.19186  | 5.95566 | -3.37577 |
| N | -0.15437 | 2.34275 | 2.94201  |
| C | 4.26146  | 6.91239 | 0.03958  |
| C | 4.40520  | 6.39182 | -2.12885 |
| C | 3.12775  | 5.19233 | -3.54733 |
| C | 2.32117  | 4.76380 | -2.44462 |
| C | 1.11828  | 3.97449 | -2.69361 |
| C | 0.85738  | 3.66264 | -0.32715 |
| C | 0.14039  | 2.96891 | 0.62509  |
| H | -0.72824 | 2.42160 | 0.28855  |
| C | 0.56404  | 2.97091 | 1.96631  |
| C | 1.77868  | 3.64675 | 2.25681  |
| H | 2.20428  | 3.60849 | 3.24902  |
| C | 2.45307  | 4.34472 | 1.28602  |
| H | 3.39373  | 4.80898 | 1.54685  |
| C | 1.99035  | 4.42406 | -0.03785 |

|   |          |          |          |
|---|----------|----------|----------|
| C | 2.65455  | 5.10881  | -1.11788 |
| C | 3.67344  | 6.07914  | -0.97010 |
| C | 3.83338  | 7.21822  | 1.41422  |
| C | 2.48137  | 7.40975  | 1.69989  |
| H | 1.75036  | 7.31545  | 0.90406  |
| C | 2.07387  | 7.71621  | 2.99003  |
| H | 1.02175  | 7.86407  | 3.20114  |
| C | 3.01397  | 7.83729  | 4.00756  |
| H | 2.69604  | 8.07466  | 5.01557  |
| C | 4.36366  | 7.65834  | 3.72635  |
| H | 5.09991  | 7.75505  | 4.51517  |
| C | 4.77278  | 7.35200  | 2.43524  |
| H | 5.82273  | 7.20583  | 2.21055  |
| C | 6.36129  | 7.88743  | -2.61808 |
| H | 6.28188  | 7.45407  | -3.61198 |
| H | 7.35986  | 7.70930  | -2.22139 |
| H | 6.18109  | 8.96087  | -2.67398 |
| C | 2.86090  | 4.78105  | -4.96083 |
| H | 3.67675  | 5.14922  | -5.58026 |
| H | 1.91726  | 5.19428  | -5.31898 |
| H | 2.78132  | 3.69839  | -5.05894 |
| C | -1.30373 | 1.51886  | 2.59767  |
| H | -1.95108 | 2.07693  | 1.91637  |
| H | -1.88207 | 1.37521  | 3.51171  |
| C | -0.94180 | 0.16783  | 1.99714  |
| H | -1.84345 | -0.35571 | 1.67331  |
| H | -0.42951 | -0.46182 | 2.72571  |
| H | -0.28731 | 0.28095  | 1.13069  |
| C | 0.35121  | 2.26556  | 4.30434  |
| H | -0.50135 | 2.05576  | 4.95249  |
| H | 0.71902  | 3.24981  | 4.60293  |
| C | 1.42867  | 1.21011  | 4.50777  |
| H | 1.83725  | 1.27489  | 5.51825  |
| H | 2.24949  | 1.34201  | 3.79979  |
| H | 1.02595  | 0.20550  | 4.37179  |

Molecule 27\_8102459

Cartesian Coordinates (in Angstroms) and Total Electronic Potential Energy (in kcal/mol)

49

c27\_8102459.xyz.out Energy: -801349.6610777

|   |          |          |          |
|---|----------|----------|----------|
| O | 4.40607  | 20.07952 | 7.62821  |
| O | 4.00803  | 20.79165 | 5.58239  |
| O | 10.10574 | 23.58663 | 4.60396  |
| O | 11.46153 | 25.23858 | 3.19742  |
| H | 11.19728 | 24.68474 | 3.97610  |
| N | 4.90705  | 18.41934 | 12.05550 |
| N | 7.77853  | 22.33752 | 5.10275  |
| N | 8.05945  | 22.92447 | 3.90918  |
| H | 7.33295  | 22.96552 | 3.19991  |
| C | 5.42879  | 19.02647 | 10.95251 |

|   |          |          |          |
|---|----------|----------|----------|
| C | 6.77832  | 19.48242 | 10.94128 |
| H | 7.40716  | 19.33045 | 11.80645 |
| C | 7.29642  | 20.13303 | 9.85360  |
| H | 8.32278  | 20.48155 | 9.87113  |
| C | 6.52570  | 20.36631 | 8.70026  |
| C | 6.98866  | 21.02053 | 7.53637  |
| H | 8.00868  | 21.39013 | 7.50244  |
| C | 6.18010  | 21.19585 | 6.45223  |
| C | 4.81622  | 20.70102 | 6.48410  |
| C | 5.20470  | 19.90117 | 8.71827  |
| C | 4.65344  | 19.24610 | 9.79733  |
| H | 3.63237  | 18.90393 | 9.70848  |
| C | 3.51684  | 17.98998 | 12.08103 |
| H | 3.20386  | 17.96587 | 13.12655 |
| H | 2.90412  | 18.75646 | 11.60313 |
| C | 3.28029  | 16.63289 | 11.43618 |
| H | 3.75940  | 15.83799 | 12.01019 |
| H | 2.21160  | 16.41512 | 11.38967 |
| H | 3.67905  | 16.60536 | 10.41975 |
| C | 5.77378  | 17.93785 | 13.12453 |
| H | 6.39025  | 18.75987 | 13.49800 |
| H | 5.12296  | 17.65109 | 13.95151 |
| C | 6.64761  | 16.75759 | 12.72603 |
| H | 7.28344  | 17.00002 | 11.87265 |
| H | 7.29430  | 16.47126 | 13.55766 |
| H | 6.03960  | 15.89346 | 12.45488 |
| C | 6.60074  | 21.85815 | 5.22858  |
| H | 5.86344  | 21.92403 | 4.42604  |
| C | 9.26249  | 23.51996 | 3.70262  |
| C | 9.50711  | 24.09564 | 2.36366  |
| C | 8.69893  | 23.82296 | 1.25176  |
| H | 7.87129  | 23.12819 | 1.33333  |
| C | 8.94683  | 24.39896 | 0.02214  |
| H | 8.31334  | 24.16823 | -0.82413 |
| C | 10.02640 | 25.27253 | -0.11701 |
| H | 10.22839 | 25.73421 | -1.07603 |
| C | 10.85067 | 25.54549 | 0.95572  |
| H | 11.70122 | 26.20967 | 0.86510  |
| C | 10.61235 | 24.95293 | 2.19735  |

Molecule 28\_7017064

Cartesian Coordinates (in Angstroms) and Total Electronic Potential Energy (in kcal/mol)

49

c28\_7017064.xyz.out Energy: -801350.1096780

|   |         |          |         |
|---|---------|----------|---------|
| C | 3.45942 | 18.11628 | 4.02098 |
| C | 2.62360 | 19.10667 | 4.54089 |
| H | 2.76367 | 20.12287 | 4.19372 |
| C | 1.64471 | 18.78253 | 5.45807 |
| H | 0.99869 | 19.56060 | 5.84656 |
| C | 1.47370 | 17.46188 | 5.87580 |

|   |          |          |         |
|---|----------|----------|---------|
| H | 0.69216  | 17.20412 | 6.57827 |
| C | 2.30734  | 16.48214 | 5.37538 |
| H | 2.14003  | 15.45900 | 5.69116 |
| C | 3.32202  | 16.78374 | 4.45669 |
| C | 4.25164  | 15.77087 | 3.91294 |
| C | 5.09295  | 12.49382 | 4.76638 |
| H | 4.47066  | 12.38180 | 5.65647 |
| C | 5.91321  | 11.35380 | 4.39391 |
| C | 6.74613  | 11.33784 | 3.31336 |
| H | 6.81309  | 12.21922 | 2.68334 |
| C | 7.51994  | 10.19900 | 2.99851 |
| C | 7.41636  | 9.07626  | 3.83104 |
| C | 5.81418  | 10.18181 | 5.24336 |
| C | 8.39776  | 10.09858 | 1.90365 |
| H | 8.50697  | 10.95380 | 1.24640 |
| C | 9.11478  | 8.95738  | 1.66162 |
| H | 9.79367  | 8.93578  | 0.82125 |
| C | 8.99646  | 7.82172  | 2.51393 |
| C | 8.12139  | 7.91408  | 3.61467 |
| H | 7.96057  | 7.09118  | 4.29629 |
| C | 10.50932 | 6.51310  | 1.07348 |
| H | 10.52393 | 5.44271  | 0.85230 |
| H | 10.01270 | 6.98672  | 0.22491 |
| C | 11.92824 | 7.03017  | 1.23689 |
| H | 12.43097 | 6.51467  | 2.05843 |
| H | 12.50725 | 6.86421  | 0.32672 |
| H | 11.93307 | 8.09952  | 1.45776 |
| C | 9.69381  | 5.56534  | 3.19822 |
| H | 10.64779 | 5.04456  | 3.08413 |
| H | 9.67442  | 5.93471  | 4.22535 |
| C | 8.54317  | 4.60744  | 2.93915 |
| H | 8.60399  | 4.20220  | 1.92647 |
| H | 8.57053  | 3.77264  | 3.64156 |
| H | 7.58027  | 5.11149  | 3.04288 |
| N | 4.28774  | 14.56607 | 4.53794 |
| N | 5.09937  | 13.57392 | 4.08319 |
| N | 9.70675  | 6.68911  | 2.27455 |
| O | 4.37848  | 18.48980 | 3.11604 |
| H | 4.82853  | 17.66684 | 2.79542 |
| O | 4.97712  | 16.00943 | 2.94081 |
| O | 5.11014  | 10.07589 | 6.22697 |
| O | 6.58052  | 9.10275  | 4.90716 |
| H | 3.76961  | 14.41440 | 5.39876 |

Molecule 29\_4027128

Cartesian Coordinates (in Angstroms) and Total Electronic Potential Energy (in kcal/mol)

52

c29\_4027128.xyz.out Energy: -813393.9699756

|   |         |          |         |
|---|---------|----------|---------|
| O | 2.65018 | 19.81574 | 4.54705 |
| O | 4.32109 | 20.56742 | 5.75993 |

|   |          |          |          |
|---|----------|----------|----------|
| N | 6.85115  | 15.26095 | 3.72003  |
| N | 8.03976  | 15.50648 | 4.35754  |
| N | 4.74244  | 16.40054 | 3.45358  |
| N | -1.19150 | 18.53502 | 2.06662  |
| C | 6.70974  | 14.10037 | 2.92288  |
| C | 5.47225  | 13.47707 | 2.79656  |
| H | 4.61213  | 13.87260 | 3.31788  |
| C | 5.36043  | 12.33969 | 2.00825  |
| H | 4.39669  | 11.85483 | 1.91142  |
| C | 6.47231  | 11.81547 | 1.36147  |
| H | 6.37927  | 10.92507 | 0.75217  |
| C | 7.70660  | 12.43804 | 1.50666  |
| H | 8.58049  | 12.03601 | 1.00878  |
| C | 7.83039  | 13.58184 | 2.28109  |
| H | 8.78540  | 14.07686 | 2.39570  |
| C | 9.04350  | 17.20460 | 5.80434  |
| H | 8.73898  | 17.32915 | 6.84556  |
| H | 9.90589  | 16.54079 | 5.76904  |
| H | 9.33997  | 18.18653 | 5.42959  |
| C | 7.93375  | 16.64381 | 4.99358  |
| C | 6.63489  | 17.20204 | 4.77755  |
| C | 5.97015  | 16.27621 | 3.94242  |
| C | 5.95158  | 18.34393 | 5.15166  |
| H | 6.38063  | 19.10668 | 5.79114  |
| C | 4.65990  | 18.49290 | 4.66449  |
| C | 3.90486  | 19.68730 | 5.04032  |
| C | 2.06952  | 18.88542 | 3.71776  |
| C | 2.74827  | 17.73262 | 3.33138  |
| C | 4.09143  | 17.50785 | 3.81473  |
| C | 2.06359  | 16.86029 | 2.47601  |
| H | 2.56865  | 15.95965 | 2.14904  |
| C | 0.78682  | 17.12253 | 2.04273  |
| H | 0.31192  | 16.41557 | 1.37810  |
| C | 0.09733  | 18.29284 | 2.45579  |
| C | 0.78702  | 19.17974 | 3.30145  |
| H | 0.35376  | 20.10636 | 3.64929  |
| C | -1.83424 | 17.69531 | 1.06625  |
| H | -1.71099 | 16.64541 | 1.34378  |
| H | -2.90566 | 17.89406 | 1.12130  |
| C | -1.33911 | 17.92934 | -0.35403 |
| H | -1.79393 | 17.20960 | -1.03767 |
| H | -1.59651 | 18.93163 | -0.69906 |
| H | -0.25470 | 17.81996 | -0.41890 |
| C | -1.84443 | 19.78569 | 2.42192  |
| H | -2.91924 | 19.63258 | 2.31190  |
| H | -1.67880 | 19.98397 | 3.48372  |
| C | -1.40215 | 20.97785 | 1.58504  |
| H | -1.71026 | 20.86363 | 0.54478  |
| H | -1.84784 | 21.89746 | 1.96940  |
| H | -0.31661 | 21.09382 | 1.60417  |

Molecule 30\_2231616

Cartesian Coordinates (in Angstroms) and Total Electronic Potential Energy (in kcal/mol)

49

c30\_2231616.xyz.out Energy: -1182860.7320671

|    |         |          |          |
|----|---------|----------|----------|
| C  | 3.66597 | 12.36737 | 17.06006 |
| C  | 4.11503 | 12.99321 | 18.26038 |
| H  | 4.43682 | 14.02451 | 18.24565 |
| C  | 4.17060 | 12.30086 | 19.43924 |
| H  | 4.51900 | 12.79456 | 20.33941 |
| C  | 3.79178 | 10.94768 | 19.51375 |
| C  | 3.81331 | 10.16777 | 20.69020 |
| H  | 4.14259 | 10.64538 | 21.60700 |
| C  | 3.44167 | 8.85141  | 20.69503 |
| C  | 2.96915 | 8.25948  | 19.45933 |
| C  | 3.36108 | 10.34366 | 18.32688 |
| C  | 3.29060 | 11.01050 | 17.12499 |
| H  | 2.92087 | 10.46913 | 16.26590 |
| C  | 3.42562 | 8.05818  | 21.93804 |
| C  | 4.72501 | 4.79115  | 21.52312 |
| C  | 5.10377 | 3.91935  | 20.49943 |
| C  | 5.52201 | 2.62743  | 20.77130 |
| H  | 5.80508 | 1.98310  | 19.94852 |
| C  | 5.56991 | 2.17765  | 22.08229 |
| H  | 5.89588 | 1.16793  | 22.29528 |
| C  | 5.19532 | 3.03572  | 23.11022 |
| H  | 5.22704 | 2.69696  | 24.13834 |
| C  | 4.77883 | 4.32842  | 22.83818 |
| H  | 4.48745 | 4.99727  | 23.63629 |
| C  | 2.97569 | 8.76989  | 23.19661 |
| C  | 3.83996 | 14.49347 | 15.82676 |
| H  | 3.44069 | 14.97497 | 16.72113 |
| H  | 3.24678 | 14.87525 | 14.99198 |
| C  | 5.30538 | 14.83782 | 15.62423 |
| H  | 5.91453 | 14.46234 | 16.44898 |
| H  | 5.44302 | 15.91856 | 15.55934 |
| H  | 5.67917 | 14.39142 | 14.70005 |
| C  | 3.26392 | 12.41338 | 14.63542 |
| H  | 3.70477 | 11.41543 | 14.60439 |
| H  | 3.75136 | 12.98256 | 13.83977 |
| C  | 1.76470 | 12.35813 | 14.39605 |
| H  | 1.26068 | 11.79742 | 15.18572 |
| H  | 1.54393 | 11.87878 | 13.44088 |
| H  | 1.34333 | 13.36581 | 14.37636 |
| Cl | 5.04565 | 4.46045  | 18.85563 |
| F  | 1.95349 | 9.60298  | 22.95444 |
| F  | 3.96111 | 9.52902  | 23.72289 |
| F  | 2.59063 | 7.93438  | 24.15402 |
| N  | 3.60577 | 13.05849 | 15.89401 |
| N  | 3.82159 | 6.85984  | 22.16182 |
| N  | 4.33342 | 6.09079  | 21.21140 |



|   |         |         |          |
|---|---------|---------|----------|
| H | 4.13535 | 6.30823 | 20.23617 |
| O | 2.97432 | 9.03889 | 18.34231 |
| O | 2.56115 | 7.11962 | 19.33009 |

Molecule 31\_7054004

Cartesian Coordinates (in Angstroms) and Total Electronic Potential Energy (in kcal/mol)

46

c31\_7054004.xyz.out Energy: -753433.4857152

|   |          |         |          |
|---|----------|---------|----------|
| O | 4.69062  | 7.95859 | 14.26962 |
| N | 5.45737  | 7.87076 | 10.10545 |
| C | 4.11584  | 7.31309 | 12.03415 |
| C | 3.58152  | 7.35139 | 14.77354 |
| O | 6.04794  | 8.57040 | 12.66366 |
| C | 2.69370  | 6.70210 | 13.90468 |
| C | 2.25221  | 6.81044 | 16.70565 |
| C | 1.56177  | 6.09675 | 14.48432 |
| H | 0.86150  | 5.57939 | 13.83859 |
| C | 3.38906  | 7.41863 | 16.13345 |
| H | 4.11594  | 7.95942 | 16.72221 |
| O | 3.53996  | 6.65784 | 9.84281  |
| C | 2.99776  | 6.70270 | 12.53089 |
| H | 2.33270  | 6.20749 | 11.83089 |
| C | 5.01705  | 7.98180 | 12.94670 |
| C | 4.33782  | 7.24748 | 10.56479 |
| N | 2.03166  | 6.85389 | 18.04178 |
| C | 1.34087  | 6.14309 | 15.83275 |
| H | 0.47030  | 5.64655 | 16.23626 |
| C | 5.92296  | 7.97307 | 8.79519  |
| C | 5.26430  | 7.44921 | 7.67805  |
| H | 4.33129  | 6.92239 | 7.79332  |
| C | 7.13480  | 8.65561 | 8.62212  |
| H | 7.64063  | 9.05862 | 9.49208  |
| C | 7.02447  | 8.29190 | 6.25273  |
| C | 7.58403  | 8.45226 | 4.94736  |
| C | 7.68332  | 8.81606 | 7.36859  |
| H | 8.61975  | 9.34431 | 7.24390  |
| C | 3.00327  | 7.42486 | 18.96345 |
| H | 2.86907  | 6.92058 | 19.92341 |
| H | 4.01326  | 7.17654 | 18.63243 |
| C | 0.81505  | 6.33170 | 18.64833 |
| H | 0.64210  | 6.90565 | 19.56205 |
| H | -0.03853 | 6.53760 | 18.00085 |
| C | 5.81848  | 7.61222 | 6.42002  |
| H | 5.31027  | 7.20756 | 5.55391  |
| C | 0.91656  | 4.85135 | 18.97253 |
| H | 1.74312  | 4.66709 | 19.66254 |
| H | -0.00250 | 4.49454 | 19.44043 |
| H | 1.09437  | 4.26323 | 18.06985 |
| C | 2.83392  | 8.92483 | 19.13319 |
| H | 1.83746  | 9.15712 | 19.51540 |

|   |         |         |          |
|---|---------|---------|----------|
| H | 3.56855 | 9.31786 | 19.83790 |
| H | 2.95929 | 9.44473 | 18.18135 |
| N | 8.03664 | 8.58261 | 3.89390  |
| H | 6.02420 | 8.31449 | 10.83147 |

Molecule 32\_7106102

Cartesian Coordinates (in Angstroms) and Total Electronic Potential Energy (in kcal/mol)

51

c32\_7106102.xyz.out Energy: -1049329.6202930

|   |         |          |          |
|---|---------|----------|----------|
| C | 7.97389 | 13.74534 | 13.52846 |
| N | 7.09187 | 14.63207 | 12.95490 |
| C | 6.52754 | 15.30402 | 13.99832 |
| C | 6.31201 | 12.93993 | 8.64866  |
| C | 6.64886 | 14.12716 | 9.41138  |
| C | 6.87505 | 15.31302 | 8.76721  |
| H | 7.13940 | 16.19097 | 9.34825  |
| C | 6.77605 | 15.41221 | 7.36717  |
| C | 6.98322 | 16.59232 | 6.62641  |
| H | 7.23746 | 17.50117 | 7.15982  |
| C | 6.86636 | 16.61182 | 5.26437  |
| H | 7.02805 | 17.54325 | 4.74244  |
| C | 6.54210 | 15.42797 | 4.53581  |
| C | 6.32191 | 14.24437 | 5.27187  |
| H | 6.05415 | 13.30969 | 4.80159  |
| C | 6.44487 | 14.25705 | 6.64093  |
| C | 6.07638 | 14.24061 | 2.44707  |
| H | 6.62662 | 13.38506 | 2.84470  |
| H | 6.41901 | 14.36508 | 1.41926  |
| C | 4.57923 | 13.97208 | 2.46703  |
| H | 4.19857 | 13.91989 | 3.48895  |
| H | 4.36002 | 13.02286 | 1.97480  |
| H | 4.03333 | 14.75784 | 1.94306  |
| C | 6.55896 | 16.68777 | 2.43278  |
| H | 6.76244 | 16.42467 | 1.39442  |
| H | 7.43076 | 17.24963 | 2.77537  |
| C | 5.30333 | 17.54265 | 2.51383  |
| H | 4.45686 | 17.04090 | 2.04333  |
| H | 5.46078 | 18.49330 | 2.00095  |
| H | 5.03420 | 17.75646 | 3.55015  |
| C | 5.52449 | 16.36425 | 13.89787 |
| C | 5.49610 | 17.33889 | 14.89767 |
| H | 6.22639 | 17.29480 | 15.69603 |
| C | 4.54796 | 18.34887 | 14.86064 |
| H | 4.53612 | 19.10305 | 15.63787 |
| C | 3.61862 | 18.39642 | 13.82705 |
| H | 2.87903 | 19.18731 | 13.79771 |
| C | 3.63781 | 17.42422 | 12.83519 |
| H | 2.90792 | 17.44952 | 12.03536 |
| C | 4.58446 | 16.40926 | 12.86757 |
| H | 4.57678 | 15.64353 | 12.10327 |

|   |         |          |          |
|---|---------|----------|----------|
| N | 7.92879 | 13.87491 | 14.83001 |
| N | 7.02037 | 14.84093 | 15.12619 |
| N | 6.95892 | 14.96619 | 11.61922 |
| C | 6.73303 | 13.96816 | 10.84664 |
| H | 6.56074 | 12.96709 | 11.23927 |
| N | 6.46831 | 15.43838 | 3.17993  |
| O | 6.22733 | 13.08074 | 7.29271  |
| O | 6.10038 | 11.83763 | 9.10780  |
| S | 9.14442 | 12.78376 | 12.68187 |
| H | 8.32049 | 11.83762 | 12.22106 |

Molecule 33\_1558692

Cartesian Coordinates (in Angstroms) and Total Electronic Potential Energy (in kcal/mol)

51

c33\_1558692.xyz.out Energy: -812746.0866924

|   |          |          |          |
|---|----------|----------|----------|
| C | 1.13531  | 15.97449 | 6.29706  |
| C | -0.22675 | 15.92956 | 5.99815  |
| H | -0.53273 | 16.04359 | 4.96519  |
| C | -1.15077 | 15.74212 | 7.01049  |
| H | -2.20631 | 15.70862 | 6.76825  |
| C | -0.73237 | 15.59718 | 8.33176  |
| H | -1.45676 | 15.45067 | 9.12298  |
| C | 0.62222  | 15.64168 | 8.62043  |
| H | 0.96281  | 15.52891 | 9.64290  |
| C | 1.56580  | 15.82952 | 7.61257  |
| H | 2.61714  | 15.85686 | 7.86485  |
| C | 3.36382  | 16.24207 | 5.49883  |
| H | 3.56359  | 17.06429 | 6.19309  |
| H | 3.71958  | 15.30914 | 5.94647  |
| C | 4.07031  | 16.46075 | 4.21242  |
| C | 4.22493  | 17.60970 | 3.48308  |
| H | 3.89844  | 18.62197 | 3.63977  |
| C | 5.72070  | 19.36252 | 1.50591  |
| C | 5.35640  | 17.97868 | 1.27910  |
| C | 5.46122  | 17.41452 | 0.05258  |
| H | 5.18413  | 16.37564 | -0.08542 |
| C | 5.93732  | 18.17205 | -1.04767 |
| C | 6.27427  | 19.51156 | -0.83237 |
| C | 6.74217  | 20.34066 | -1.82813 |
| H | 6.98942  | 21.35707 | -1.55876 |
| C | 6.88933  | 19.84555 | -3.13805 |
| C | 6.56146  | 18.47896 | -3.36659 |
| H | 6.66915  | 18.05279 | -4.35326 |
| C | 6.09692  | 17.68080 | -2.35378 |
| H | 5.84787  | 16.64530 | -2.55555 |
| C | 7.64799  | 20.08989 | -5.45903 |
| H | 6.82339  | 19.46680 | -5.81397 |
| H | 7.71165  | 20.92561 | -6.15717 |
| C | 8.95164  | 19.30526 | -5.47253 |
| H | 9.11320  | 18.85808 | -6.45532 |

|   |         |          |          |
|---|---------|----------|----------|
| H | 9.80140 | 19.95208 | -5.25079 |
| H | 8.93962 | 18.50198 | -4.73316 |
| C | 7.68522 | 22.03186 | -3.89981 |
| H | 7.62494 | 22.56563 | -4.84943 |
| H | 6.93337 | 22.48821 | -3.25201 |
| C | 9.07521 | 22.19334 | -3.30186 |
| H | 9.84501 | 21.88939 | -4.01258 |
| H | 9.25490 | 23.23704 | -3.03709 |
| H | 9.19117 | 21.58916 | -2.39971 |
| N | 4.68887 | 15.45124 | 3.54574  |
| N | 5.21151 | 15.91150 | 2.45770  |
| N | 4.93461 | 17.22559 | 2.39864  |
| N | 7.30832 | 20.64938 | -4.15714 |
| O | 1.97053 | 16.16442 | 5.23871  |
| O | 6.14803 | 20.05224 | 0.41496  |
| O | 5.67373 | 19.94659 | 2.56689  |

Molecule 34\_4325585

Cartesian Coordinates (in Angstroms) and Total Electronic Potential Energy (in kcal/mol)

43

c34\_4325585.xyz.out Energy: -1520324.2429103

|    |          |          |           |
|----|----------|----------|-----------|
| Cl | 3.46985  | 7.67434  | 5.02864   |
| Hg | 3.71865  | 8.61511  | 2.92583   |
| Cl | 3.32128  | 9.83248  | 0.97624   |
| S  | 6.20557  | 7.35771  | 2.49454   |
| O  | 6.00253  | 11.03041 | -5.25494  |
| O  | 4.38024  | 10.13904 | -4.06203  |
| N  | 9.22894  | 13.05811 | -8.07894  |
| N  | 6.84501  | 9.03251  | -0.98700  |
| N  | 6.23705  | 8.45843  | 0.09075   |
| H  | 5.21974  | 8.46555  | 0.16660   |
| N  | 8.28323  | 8.06612  | 1.02017   |
| H  | 8.70591  | 8.44331  | 0.18129   |
| H  | 8.85593  | 7.74350  | 1.78552   |
| C  | 11.48600 | 12.58330 | -8.97517  |
| H  | 12.46500 | 13.02487 | -9.16936  |
| H  | 11.62237 | 11.71341 | -8.32933  |
| H  | 11.07492 | 12.23565 | -9.92559  |
| C  | 10.55634 | 13.59812 | -8.33270  |
| H  | 10.43062 | 14.46104 | -8.99149  |
| H  | 10.97880 | 13.98864 | -7.40555  |
| C  | 7.44583  | 14.55272 | -8.91971  |
| H  | 6.72557  | 14.69298 | -9.72741  |
| H  | 6.89992  | 14.52421 | -7.97462  |
| H  | 8.10914  | 15.42057 | -8.90066  |
| C  | 8.24493  | 13.27759 | -9.12838  |
| H  | 8.78974  | 13.32537 | -10.07451 |
| H  | 7.58820  | 12.40898 | -9.20325  |
| C  | 8.91482  | 12.41822 | -6.92483  |
| C  | 7.59016  | 12.02334 | -6.64838  |

|   |          |          |          |
|---|----------|----------|----------|
| H | 6.77283  | 12.22936 | -7.32441 |
| C | 7.30186  | 11.37754 | -5.46863 |
| C | 8.27349  | 11.08450 | -4.50041 |
| C | 9.59389  | 11.47936 | -4.78665 |
| H | 10.37028 | 11.25955 | -4.06253 |
| C | 9.91431  | 12.12079 | -5.95264 |
| H | 10.94577 | 12.38468 | -6.13761 |
| C | 7.86121  | 10.43239 | -3.31868 |
| H | 8.59848  | 10.20753 | -2.55446 |
| C | 6.55602  | 10.08990 | -3.11223 |
| C | 5.56289  | 10.39717 | -4.12741 |
| C | 6.06148  | 9.43439  | -1.91662 |
| H | 4.98154  | 9.29897  | -1.84589 |
| C | 6.95808  | 8.00356  | 1.12644  |

Molecule 35\_7154613

Cartesian Coordinates (in Angstroms) and Total Electronic Potential Energy (in kcal/mol)

48

c35\_7154613.xyz.out Energy: -1229292.7673021

|   |          |          |          |
|---|----------|----------|----------|
| S | 9.70239  | 10.57627 | 5.65836  |
| S | 12.46918 | 11.21044 | 6.68442  |
| O | 6.44690  | 7.08165  | 11.13663 |
| N | 9.36202  | 9.41353  | 8.15071  |
| O | 12.54572 | 11.44849 | 3.13936  |
| O | 8.48517  | 7.64971  | 11.74968 |
| N | 2.01439  | 5.69886  | 10.15545 |
| N | 10.60167 | 9.94155  | 7.99636  |
| H | 11.28826 | 9.87926  | 8.74879  |
| O | 11.78381 | 9.43724  | 3.75582  |
| C | 7.82602  | 8.24366  | 9.54780  |
| C | 5.42020  | 7.02154  | 10.24278 |
| C | 5.57007  | 7.58398  | 8.96695  |
| C | 6.80199  | 8.19270  | 8.64633  |
| H | 6.93935  | 8.62809  | 7.66137  |
| C | 3.16502  | 6.31187  | 9.77842  |
| C | 4.46720  | 7.49155  | 8.09767  |
| H | 4.55597  | 7.90953  | 7.10125  |
| C | 11.67954 | 10.63976 | 3.74366  |
| C | 4.26346  | 6.40229  | 10.65737 |
| H | 4.22834  | 6.01779  | 11.66672 |
| C | 1.89829  | 4.99884  | 11.42561 |
| H | 2.83960  | 4.49460  | 11.65240 |
| H | 1.15735  | 4.20679  | 11.28958 |
| C | 0.82074  | 5.70289  | 9.32317  |
| H | -0.03833 | 5.64518  | 9.99643  |
| H | 0.73269  | 6.66101  | 8.80850  |
| C | 0.79094  | 4.54664  | 8.33840  |
| H | 0.83042  | 3.59198  | 8.86783  |
| H | -0.12454 | 4.56810  | 7.74462  |
| H | 1.64390  | 4.58909  | 7.65797  |

|   |          |          |          |
|---|----------|----------|----------|
| C | 9.11430  | 8.85097  | 9.27331  |
| H | 9.86327  | 8.80511  | 10.06557 |
| C | 10.53370 | 11.42557 | 4.33429  |
| H | 10.87670 | 12.41213 | 4.64090  |
| H | 9.77758  | 11.55395 | 3.55400  |
| C | 3.30314  | 6.88075  | 8.47894  |
| H | 2.49094  | 6.81493  | 7.76929  |
| C | 7.65288  | 7.66329  | 10.86672 |
| C | 10.96851 | 10.55718 | 6.85744  |
| C | 1.47944  | 5.91624  | 12.56178 |
| H | 2.20668  | 6.71745  | 12.70780 |
| H | 0.51145  | 6.37464  | 12.34670 |
| H | 1.39139  | 5.35861  | 13.49571 |
| C | 13.67769 | 10.80391 | 2.55429  |
| H | 14.23596 | 10.26645 | 3.32139  |
| H | 13.36107 | 10.10513 | 1.78026  |
| H | 14.28771 | 11.59402 | 2.12564  |

Molecule 36\_7119168

Cartesian Coordinates (in Angstroms) and Total Electronic Potential Energy (in kcal/mol)

52

c36\_7119168.xyz.out Energy: -825981.6786300

|   |          |         |          |
|---|----------|---------|----------|
| O | -0.99243 | 3.88155 | 2.18655  |
| O | -0.20229 | 4.54686 | 4.13180  |
| O | 2.57812  | 8.28759 | -1.58905 |
| O | 1.00372  | 7.18490 | -7.63044 |
| N | 1.29410  | 5.70469 | 8.48705  |
| N | 1.19746  | 6.62627 | 0.06100  |
| N | 1.07198  | 6.61515 | -1.29032 |
| H | 0.51007  | 5.88619 | -1.72229 |
| C | -0.24824 | 4.64337 | 2.77031  |
| C | 0.58643  | 5.33285 | 4.91791  |
| C | 0.53096  | 5.11571 | 6.27662  |
| H | -0.11866 | 4.33020 | 6.63609  |
| C | 1.32963  | 5.89030 | 7.14117  |
| C | 2.17433  | 6.87811 | 6.55855  |
| H | 2.78837  | 7.50593 | 7.18811  |
| C | 2.20668  | 7.06837 | 5.20251  |
| H | 2.85141  | 7.83082 | 4.78008  |
| C | 1.41177  | 6.30145 | 4.33199  |
| C | 1.38988  | 6.43640 | 2.92513  |
| H | 2.02080  | 7.18171 | 2.45108  |
| C | 0.59458  | 5.64712 | 2.14821  |
| C | 0.53345  | 5.73989 | 0.69787  |
| H | -0.10414 | 5.01869 | 0.18257  |
| C | 0.34963  | 4.79179 | 9.11098  |
| H | -0.60332 | 4.83109 | 8.57995  |
| H | 0.14956  | 5.17218 | 10.11592 |
| C | 0.87491  | 3.36815 | 9.18698  |
| H | 1.80085  | 3.33238 | 9.76552  |

|   |          |         |          |
|---|----------|---------|----------|
| H | 1.08450  | 2.97355 | 8.19075  |
| H | 0.14729  | 2.71301 | 9.66914  |
| C | 2.20211  | 6.39292 | 9.39169  |
| H | 3.18312  | 6.49396 | 8.92431  |
| H | 2.34910  | 5.74038 | 10.25632 |
| C | 1.66887  | 7.74230 | 9.84233  |
| H | 2.36450  | 8.22177 | 10.53333 |
| H | 0.71006  | 7.62409 | 10.35229 |
| H | 1.51645  | 8.40785 | 8.99014  |
| C | 1.78590  | 7.48645 | -2.06456 |
| C | 1.54614  | 7.38224 | -3.52832 |
| C | 0.39819  | 6.81822 | -4.09480 |
| H | -0.40550 | 6.44122 | -3.47281 |
| C | 0.24302  | 6.76894 | -5.46514 |
| H | -0.64629 | 6.34648 | -5.91608 |
| C | 1.23700  | 7.28087 | -6.30241 |
| C | 2.38256  | 7.85405 | -5.75213 |
| H | 3.16186  | 8.26060 | -6.38191 |
| C | 2.52039  | 7.90377 | -4.37291 |
| H | 3.40217  | 8.35167 | -3.93124 |
| C | 1.97683  | 7.69654 | -8.52017 |
| H | 2.93266  | 7.17985 | -8.39900 |
| H | 2.12005  | 8.77045 | -8.37346 |
| H | 1.59863  | 7.51966 | -9.52415 |

Molecule 37\_1547843

Cartesian Coordinates (in Angstroms) and Total Electronic Potential Energy (in kcal/mol)

54

c37\_1547843.xyz.out Energy: -917755.1143872

|   |         |          |          |
|---|---------|----------|----------|
| F | 4.67443 | 7.25500  | -4.54894 |
| F | 4.55913 | 8.47019  | -9.04519 |
| O | 0.94804 | 4.84384  | 2.43359  |
| O | 0.94985 | 7.00104  | 2.03546  |
| C | 2.81648 | 8.59785  | -2.82385 |
| H | 2.76749 | 7.56981  | -3.15499 |
| N | 0.76135 | 0.26660  | 3.69227  |
| C | 1.19485 | 3.54274  | 2.12164  |
| N | 3.21505 | 10.88724 | -3.39764 |
| C | 3.56692 | 9.26638  | -5.12283 |
| C | 3.19808 | 9.58638  | -3.72269 |
| C | 1.78357 | 3.22675  | 0.89292  |
| C | 1.85391 | 5.59965  | 0.32785  |
| C | 1.08849 | 1.23059  | 2.79020  |
| C | 2.05472 | 7.97265  | -0.49878 |
| H | 1.62832 | 8.39008  | 0.40415  |
| C | 2.10041 | 4.29171  | 0.01739  |
| H | 2.55949 | 4.05717  | -0.93909 |
| C | 2.20811 | 6.64400  | -0.61661 |
| H | 2.66944 | 6.25326  | -1.52124 |
| C | 0.85119 | 2.59246  | 3.05848  |

|   |          |          |          |
|---|----------|----------|----------|
| H | 0.42262  | 2.93434  | 3.98972  |
| C | 3.22479  | 10.14614 | -6.15266 |
| H | 2.68861  | 11.04893 | -5.89012 |
| C | 2.45791  | 8.94210  | -1.51846 |
| C | 3.54570  | 9.89461  | -7.47613 |
| H | 3.26896  | 10.57586 | -8.26950 |
| C | 4.23764  | 8.73437  | -7.77059 |
| C | 4.26973  | 8.12324  | -5.49053 |
| C | 2.85975  | 11.22021 | -2.15901 |
| H | 2.87912  | 12.27881 | -1.92130 |
| C | 2.48260  | 10.30013 | -1.19557 |
| H | 2.20846  | 10.63107 | -0.20109 |
| C | 4.61758  | 7.83348  | -6.79654 |
| H | 5.17597  | 6.93910  | -7.03765 |
| C | 1.68008  | 0.89416  | 1.53894  |
| H | 1.85596  | -0.14097 | 1.28321  |
| C | 0.05509  | 0.57656  | 4.92503  |
| H | -0.51282 | -0.31469 | 5.20386  |
| H | -0.68530 | 1.35674  | 4.73800  |
| C | 2.01386  | 1.86492  | 0.63114  |
| H | 2.45954  | 1.58441  | -0.31673 |
| C | 1.11864  | -1.13012 | 3.50005  |
| H | 1.24101  | -1.56961 | 4.49333  |
| H | 2.09700  | -1.19888 | 3.02109  |
| C | 0.99259  | 0.97197  | 6.05368  |
| H | 1.69377  | 0.16265  | 6.26976  |
| H | 0.43151  | 1.18779  | 6.96458  |
| H | 1.57232  | 1.85885  | 5.79006  |
| C | 0.06992  | -1.90077 | 2.71649  |
| H | -0.89291 | -1.86801 | 3.23153  |
| H | 0.36040  | -2.94704 | 2.60548  |
| H | -0.06731 | -1.47408 | 1.72075  |
| C | 1.23668  | 5.90187  | 1.61334  |

Molecule 38\_4027132

Cartesian Coordinates (in Angstroms) and Total Electronic Potential Energy (in kcal/mol)

62

c38\_4027132.xyz.out Energy: -958247.8353306

|   |         |          |          |
|---|---------|----------|----------|
| O | 1.48688 | 4.35332  | -0.29087 |
| O | 0.69208 | 5.78804  | 1.15277  |
| N | 2.78852 | 1.82570  | -4.10159 |
| N | 4.54816 | 6.54622  | 2.71619  |
| N | 6.76212 | 5.61903  | 2.72087  |
| N | 7.42659 | 4.61552  | 2.09756  |
| C | 4.36292 | -0.11359 | -3.95208 |
| H | 5.11891 | -0.65627 | -4.52315 |
| H | 3.57514 | -0.81598 | -3.67601 |
| H | 4.83114 | 0.24505  | -3.03241 |
| C | 3.80546 | 1.03339  | -4.78352 |
| H | 4.61669 | 1.68328  | -5.12373 |



|   |          |          |          |
|---|----------|----------|----------|
| H | 3.33954  | 0.63828  | -5.68737 |
| C | 0.80396  | 0.38234  | -3.65671 |
| H | -0.26337 | 0.28989  | -3.86668 |
| H | 0.92931  | 0.52043  | -2.58044 |
| H | 1.28303  | -0.55741 | -3.93724 |
| C | 1.39847  | 1.54978  | -4.43003 |
| H | 1.35052  | 1.35022  | -5.50229 |
| H | 0.81192  | 2.45588  | -4.26880 |
| C | 3.10938  | 2.55240  | -2.99089 |
| C | 2.12660  | 3.09112  | -2.14189 |
| H | 1.06802  | 2.97079  | -2.32306 |
| C | 2.50121  | 3.81241  | -1.02636 |
| C | 3.82839  | 3.99445  | -0.63840 |
| C | 4.79864  | 3.53738  | -1.54595 |
| H | 5.83983  | 3.76911  | -1.37105 |
| C | 4.46352  | 2.84193  | -2.67870 |
| H | 5.25386  | 2.52778  | -3.34563 |
| C | 1.68770  | 5.26540  | 0.70463  |
| C | 3.05936  | 5.46152  | 1.16837  |
| C | 4.09358  | 4.70119  | 0.58699  |
| C | 3.33393  | 6.39741  | 2.21291  |
| C | 5.47997  | 5.69927  | 2.26882  |
| C | 5.33723  | 4.73721  | 1.25752  |
| C | 2.29131  | 7.30283  | 2.78751  |
| H | 2.77976  | 7.99064  | 3.47526  |
| H | 1.52900  | 6.73349  | 3.32121  |
| H | 1.77069  | 7.86273  | 2.01062  |
| C | 6.60236  | 4.05942  | 1.23670  |
| C | 7.01224  | 2.82373  | 0.54912  |
| C | 8.25664  | 2.73229  | -0.07077 |
| H | 8.92686  | 3.58344  | -0.04255 |
| C | 8.62200  | 1.56792  | -0.73374 |
| H | 9.58746  | 1.50685  | -1.22118 |
| C | 7.75083  | 0.48495  | -0.77587 |
| H | 8.03634  | -0.42144 | -1.29604 |
| C | 6.51584  | 0.56512  | -0.14130 |
| H | 5.83873  | -0.28046 | -0.15942 |
| C | 6.14836  | 1.72896  | 0.51817  |
| H | 5.18287  | 1.79835  | 1.00747  |
| C | 7.42563  | 6.39520  | 3.70542  |
| C | 6.74698  | 6.84365  | 4.83274  |
| H | 5.70314  | 6.60053  | 4.96844  |
| C | 7.42877  | 7.59607  | 5.77974  |
| H | 6.90102  | 7.94579  | 6.65848  |
| C | 8.77683  | 7.88708  | 5.61432  |
| H | 9.30300  | 8.47064  | 6.35954  |
| C | 9.44804  | 7.42076  | 4.48994  |
| H | 10.49977 | 7.64042  | 4.35355  |
| C | 8.77606  | 6.67838  | 3.53057  |
| H | 9.28617  | 6.31387  | 2.64866  |

Molecule 39\_1558693

Cartesian Coordinates (in Angstroms) and Total Electronic Potential Energy (in kcal/mol)

56

c39\_1558693.xyz.out Energy: -919135.4128799

|   |         |         |          |
|---|---------|---------|----------|
| C | 5.58526 | 7.24569 | -0.20749 |
| H | 5.39067 | 6.31862 | -0.71570 |
| C | 6.17937 | 8.41065 | -0.60694 |
| C | 6.74488 | 8.76713 | -1.93509 |
| H | 6.12575 | 9.52578 | -2.42783 |
| H | 7.75471 | 9.17665 | -1.82006 |
| C | 7.21919 | 7.65070 | -3.96973 |
| C | 7.67941 | 8.79719 | -4.56893 |
| H | 7.70276 | 9.73284 | -4.02688 |
| C | 8.13234 | 8.76983 | -5.90763 |
| H | 8.48936 | 9.69035 | -6.35306 |
| C | 8.12435 | 7.61343 | -6.63281 |
| H | 8.47068 | 7.59014 | -7.65946 |
| C | 7.65512 | 6.41688 | -6.03699 |
| C | 7.19717 | 6.41992 | -4.69801 |
| C | 7.61905 | 5.18611 | -6.72968 |
| H | 7.96271 | 5.15000 | -7.75762 |
| C | 7.15371 | 4.06858 | -6.09617 |
| H | 7.11093 | 3.10985 | -6.59636 |
| C | 6.72159 | 4.18173 | -4.75900 |
| H | 6.34852 | 3.30393 | -4.24028 |
| C | 3.65231 | 5.68752 | 1.56055  |
| C | 4.66476 | 6.60882 | 2.03635  |
| C | 4.99939 | 6.67117 | 3.34687  |
| H | 5.76246 | 7.36893 | 3.67230  |
| C | 4.35368 | 5.83727 | 4.29529  |
| C | 3.37906 | 4.94536 | 3.83628  |
| C | 2.69498 | 4.08497 | 4.66645  |
| H | 1.97519 | 3.41541 | 4.21765  |
| C | 2.96739 | 4.08533 | 6.04808  |
| C | 3.95781 | 4.98817 | 6.52802  |
| H | 4.18359 | 5.03358 | 7.58368  |
| C | 4.62263 | 5.82919 | 5.67384  |
| H | 5.36739 | 6.51393 | 6.06328  |
| C | 1.21142 | 2.40987 | 6.44401  |
| H | 0.62199 | 2.94352 | 5.69592  |
| H | 0.54587 | 2.25711 | 7.29756  |
| C | 1.68929 | 1.07039 | 5.90869  |
| H | 0.84451 | 0.45922 | 5.58630  |
| H | 2.36034 | 1.20441 | 5.05783  |
| H | 2.23121 | 0.52100 | 6.68204  |
| C | 2.65659 | 3.13985 | 8.30351  |
| H | 3.73897 | 3.21738 | 8.42123  |
| H | 2.39338 | 2.12659 | 8.61774  |
| C | 1.93758 | 4.15720 | 9.17305  |
| H | 2.20849 | 4.02940 | 10.22265 |

|   |         |         |          |
|---|---------|---------|----------|
| H | 2.18964 | 5.17677 | 8.87429  |
| H | 0.85524 | 4.03883 | 9.08432  |
| N | 5.25426 | 7.47492 | 1.08746  |
| N | 5.61914 | 8.71034 | 1.45796  |
| N | 6.18041 | 9.27559 | 0.43699  |
| N | 6.73868 | 5.30378 | -4.07920 |
| N | 2.30485 | 3.25465 | 6.89677  |
| O | 6.76874 | 7.58230 | -2.70026 |
| O | 3.28336 | 5.56404 | 0.41374  |
| O | 3.07795 | 4.89393 | 2.50599  |

Molecule 40\_1558694

Cartesian Coordinates (in Angstroms) and Total Electronic Potential Energy (in kcal/mol)

57

c40\_1558694.xyz.out Energy: -909073.7926893

|   |         |         |          |
|---|---------|---------|----------|
| C | 7.01166 | 7.85680 | -4.18511 |
| C | 6.77351 | 9.00548 | -4.89704 |
| H | 6.29503 | 9.85904 | -4.43694 |
| C | 7.16085 | 9.08333 | -6.25526 |
| H | 6.96349 | 9.99953 | -6.79880 |
| C | 7.77100 | 8.03360 | -6.87876 |
| H | 8.06631 | 8.09645 | -7.91984 |
| C | 8.02943 | 6.83653 | -6.16264 |
| C | 8.66068 | 5.72580 | -6.77184 |
| H | 8.94956 | 5.80400 | -7.81441 |
| C | 8.90316 | 4.57834 | -6.06478 |
| H | 9.38774 | 3.73649 | -6.54462 |
| C | 8.52417 | 4.48717 | -4.70914 |
| H | 8.72106 | 3.57612 | -4.15716 |
| C | 7.91047 | 5.54444 | -4.08943 |
| H | 7.61916 | 5.47992 | -3.04909 |
| C | 7.65001 | 6.73817 | -4.80053 |
| C | 6.00624 | 8.74412 | -2.22056 |
| H | 5.07490 | 8.97298 | -2.74829 |
| H | 6.63420 | 9.63991 | -2.20955 |
| C | 5.73402 | 8.32710 | -0.82288 |
| C | 4.79507 | 7.45644 | -0.33597 |
| H | 4.02792 | 6.87109 | -0.80994 |
| C | 4.37707 | 6.68655 | 2.01118  |
| C | 2.96542 | 6.40679 | 1.84918  |
| C | 5.05400 | 6.27968 | 3.11180  |
| H | 6.11086 | 6.50255 | 3.20401  |
| C | 4.38913 | 5.57108 | 4.14338  |
| C | 4.99842 | 5.10784 | 5.32158  |
| H | 6.05145 | 5.31191 | 5.47840  |
| C | 4.28876 | 4.42066 | 6.27123  |
| H | 4.79457 | 4.10529 | 7.17275  |
| C | 2.90233 | 4.14627 | 6.09717  |
| C | 2.28473 | 4.60632 | 4.91803  |
| H | 1.24334 | 4.41836 | 4.69926  |

|   |          |         |          |
|---|----------|---------|----------|
| C | 3.02644  | 5.29676 | 3.98558  |
| C | 2.83855  | 2.85146 | 8.19249  |
| H | 3.81452  | 2.45656 | 7.90469  |
| H | 2.23502  | 1.98343 | 8.47016  |
| C | 2.95783  | 3.80085 | 9.37218  |
| H | 3.55405  | 4.67772 | 9.11159  |
| H | 3.42939  | 3.30435 | 10.22215 |
| H | 1.97047  | 4.14727 | 9.68595  |
| C | 0.75860  | 3.28779 | 6.94208  |
| H | 0.30491  | 4.19158 | 6.53066  |
| H | 0.37571  | 3.19680 | 7.96183  |
| C | 0.37293  | 2.06345 | 6.12928  |
| H | 0.75236  | 2.13361 | 5.10788  |
| H | -0.71215 | 1.95536 | 6.08495  |
| H | 0.78625  | 1.15856 | 6.58068  |
| N | 6.46206  | 8.79254 | 0.22523  |
| N | 6.02576  | 8.26313 | 1.32018  |
| N | 5.01316  | 7.44023 | 0.99789  |
| N | 2.19857  | 3.46568 | 7.03972  |
| O | 6.67622  | 7.68180 | -2.88265 |
| O | 2.37722  | 5.70880 | 2.85763  |
| O | 2.27728  | 6.73309 | 0.90617  |

Molecule 41\_2237330

Cartesian Coordinates (in Angstroms) and Total Electronic Potential Energy (in kcal/mol)

55

c41\_2237330.xyz.out Energy: -910747.4703640

|   |          |          |          |
|---|----------|----------|----------|
| O | 7.38791  | -0.12507 | 0.74651  |
| O | 6.08948  | 1.61550  | 1.07779  |
| O | 10.00677 | 1.39554  | 3.73382  |
| O | 9.74954  | -0.26130 | 2.23524  |
| N | 3.01241  | 5.21128  | 1.48588  |
| N | 19.71586 | -2.27420 | 7.43219  |
| C | 1.88165  | 5.94783  | 3.58665  |
| H | 2.61051  | 5.42840  | 4.21157  |
| H | 1.54954  | 6.83842  | 4.12349  |
| H | 1.02188  | 5.28918  | 3.45755  |
| C | 2.47775  | 6.33818  | 2.24255  |
| H | 3.25661  | 7.09363  | 2.37278  |
| H | 1.71214  | 6.80237  | 1.62002  |
| C | 2.16536  | 4.64098  | 0.44624  |
| H | 1.58525  | 5.45917  | 0.01702  |
| H | 2.79945  | 4.26854  | -0.36048 |
| C | 1.23348  | 3.54762  | 0.94579  |
| H | 0.49197  | 3.95015  | 1.63749  |
| H | 0.70052  | 3.09322  | 0.10864  |
| H | 1.78792  | 2.76159  | 1.46276  |
| C | 5.74006  | 2.77946  | 1.68225  |
| C | 4.56248  | 3.37039  | 1.28440  |
| H | 3.98175  | 2.86829  | 0.52460  |

|   |          |          |         |
|---|----------|----------|---------|
| C | 4.14932  | 4.57991  | 1.88027 |
| C | 4.97699  | 5.13557  | 2.90203 |
| H | 4.69230  | 6.05656  | 3.38880 |
| C | 6.14318  | 4.52643  | 3.27343 |
| H | 6.76236  | 4.97007  | 4.04480 |
| C | 6.56628  | 3.32427  | 2.67513 |
| C | 7.74803  | 2.63427  | 3.00474 |
| H | 8.39671  | 3.04782  | 3.76813 |
| C | 8.09701  | 1.46397  | 2.38862 |
| C | 7.22884  | 0.89693  | 1.36656 |
| C | 9.33674  | 0.75491  | 2.73303 |
| C | 13.50933 | 0.31243  | 3.75308 |
| H | 14.34997 | 0.23564  | 3.07355 |
| C | 12.29228 | 0.76769  | 3.27364 |
| H | 12.16491 | 1.03035  | 2.23146 |
| C | 11.22708 | 0.88594  | 4.15275 |
| C | 11.36179 | 0.56695  | 5.49244 |
| H | 10.50705 | 0.66191  | 6.15022 |
| C | 12.58797 | 0.12153  | 5.96270 |
| H | 12.68906 | -0.15073 | 7.00679 |
| C | 13.67714 | -0.01632 | 5.10106 |
| C | 14.98059 | -0.50134 | 5.60265 |
| C | 15.43439 | -0.14113 | 6.87510 |
| H | 14.83654 | 0.52122  | 7.48948 |
| C | 16.65136 | -0.59395 | 7.35105 |
| H | 17.00120 | -0.30542 | 8.33401 |
| C | 17.44036 | -1.42202 | 6.55103 |
| C | 17.00270 | -1.79073 | 5.27794 |
| H | 17.61547 | -2.44073 | 4.66659 |
| C | 15.78317 | -1.33163 | 4.81438 |
| H | 15.43423 | -1.64248 | 3.83710 |
| C | 18.70044 | -1.89432 | 7.03848 |

Molecule 42\_2239004

Cartesian Coordinates (in Angstroms) and Total Electronic Potential Energy (in kcal/mol)

58

c42\_2239004.xyz.out Energy: -841769.0010010

|   |          |         |          |
|---|----------|---------|----------|
| N | 0.42289  | 7.53566 | 10.06017 |
| N | 19.62264 | 7.17930 | 14.40391 |
| O | 12.96946 | 5.21788 | 14.56959 |
| O | 15.03632 | 5.93467 | 14.41821 |
| C | 1.43320  | 8.33853 | 9.70991  |
| H | 1.18075  | 9.17553 | 9.06729  |
| C | 2.74214  | 8.15789 | 10.11652 |
| H | 3.49728  | 8.85941 | 9.78558  |
| C | 3.06133  | 7.07750 | 10.94584 |
| C | 2.00431  | 6.24132 | 11.31105 |
| H | 2.18312  | 5.38633 | 11.95278 |
| C | 0.72434  | 6.50560 | 10.85098 |
| H | -0.09725 | 5.85581 | 11.13402 |

|   |          |         |          |
|---|----------|---------|----------|
| C | 4.40692  | 6.78661 | 11.43868 |
| H | 4.47253  | 5.92081 | 12.09165 |
| C | 5.51264  | 7.48621 | 11.14911 |
| H | 5.43302  | 8.34870 | 10.49210 |
| C | 6.86560  | 7.21944 | 11.62894 |
| C | 7.19358  | 6.16179 | 12.48485 |
| H | 6.42585  | 5.47911 | 12.82915 |
| C | 8.49627  | 5.97235 | 12.90476 |
| H | 8.73068  | 5.14790 | 13.56948 |
| C | 9.53524  | 6.82101 | 12.49535 |
| C | 9.20534  | 7.87724 | 11.63771 |
| H | 9.96985  | 8.56348 | 11.29389 |
| C | 7.90236  | 8.06716 | 11.21775 |
| H | 7.66922  | 8.89347 | 10.55428 |
| C | 10.88506 | 6.55401 | 12.98959 |
| H | 10.97423 | 5.71179 | 13.66421 |
| C | 11.98139 | 7.26218 | 12.66999 |
| H | 11.87833 | 8.10104 | 11.98544 |
| C | 13.35078 | 7.07314 | 13.11537 |
| C | 13.71731 | 6.02469 | 14.06091 |
| C | 16.01551 | 6.75602 | 13.95103 |
| C | 15.69027 | 7.77120 | 13.04682 |
| C | 14.33677 | 7.89655 | 12.65010 |
| H | 14.07532 | 8.68278 | 11.94731 |
| C | 17.29589 | 6.54102 | 14.41441 |
| H | 17.44694 | 5.74747 | 15.13250 |
| C | 18.34613 | 7.36592 | 13.96927 |
| C | 18.02995 | 8.40110 | 13.04470 |
| H | 18.81089 | 9.04215 | 12.66111 |
| C | 16.74449 | 8.58959 | 12.60667 |
| H | 16.52865 | 9.38177 | 11.89827 |
| C | 19.98648 | 6.05726 | 15.25342 |
| H | 21.03696 | 5.82948 | 15.05459 |
| H | 19.42552 | 5.17066 | 14.95123 |
| C | 20.69699 | 8.10298 | 14.07699 |
| H | 21.41207 | 8.06991 | 14.90334 |
| H | 20.31269 | 9.12449 | 14.05645 |
| C | 19.78769 | 6.35195 | 16.73098 |
| H | 20.39723 | 7.20581 | 17.03588 |
| H | 20.07712 | 5.49319 | 17.33923 |
| H | 18.74414 | 6.58931 | 16.94719 |
| C | 21.39450 | 7.75457 | 12.77301 |
| H | 21.81937 | 6.74944 | 12.82366 |
| H | 22.20497 | 8.45624 | 12.56735 |
| H | 20.69485 | 7.78124 | 11.93507 |

Molecule 43\_7110104

Cartesian Coordinates (in Angstroms) and Total Electronic Potential Energy (in kcal/mol)

68

c43\_7110104.xyz.out Energy: -1066405.0426211

|   |          |          |          |
|---|----------|----------|----------|
| F | 7.28355  | 9.73870  | 3.44243  |
| F | 8.77388  | 11.39631 | 2.95081  |
| O | 12.00661 | 7.97851  | 7.69076  |
| N | 12.27246 | 6.09948  | 1.03234  |
| C | 11.68742 | 6.89196  | 1.97345  |
| C | 10.65281 | 7.80114  | 1.63674  |
| H | 10.29341 | 7.86622  | 0.61942  |
| C | 10.06499 | 8.59837  | 2.58720  |
| H | 9.27796  | 9.26726  | 2.27621  |
| C | 10.44943 | 8.56011  | 3.93866  |
| C | 9.92987  | 9.32770  | 5.03211  |
| N | 8.96300  | 10.27340 | 5.09337  |
| N | 7.09272  | 11.85226 | 4.59777  |
| C | 6.22484  | 12.60663 | 3.92206  |
| C | 5.61670  | 13.54517 | 4.79632  |
| C | 6.13586  | 13.33093 | 6.05831  |
| C | 7.07192  | 12.25221 | 5.93596  |
| C | 7.91950  | 11.65717 | 6.84398  |
| C | 8.85394  | 10.68319 | 6.42296  |
| C | 9.76611  | 9.97985  | 7.20124  |
| H | 9.90815  | 10.06531 | 8.26701  |
| C | 10.44867 | 9.13566  | 6.32781  |
| C | 11.50083 | 8.19971  | 6.61180  |
| O | 11.95956 | 7.50157  | 5.53507  |
| C | 11.47310 | 7.65086  | 4.25943  |
| C | 12.08033 | 6.84165  | 3.32141  |
| H | 12.87333 | 6.19416  | 3.66852  |
| C | 11.97964 | 6.23888  | -0.38422 |
| H | 11.82828 | 7.29232  | -0.62703 |
| H | 12.87554 | 5.93168  | -0.93062 |
| C | 10.78985 | 5.40204  | -0.82326 |
| H | 10.60614 | 5.51940  | -1.89293 |
| H | 9.88624  | 5.69488  | -0.28470 |
| H | 10.97189 | 4.34351  | -0.62356 |
| C | 13.24448 | 5.07932  | 1.38608  |
| H | 13.17708 | 4.29202  | 0.63036  |
| H | 12.95884 | 4.61273  | 2.33109  |
| C | 14.66394 | 5.61806  | 1.45135  |
| H | 15.36769 | 4.82560  | 1.71249  |
| H | 14.74802 | 6.41119  | 2.19700  |
| H | 14.96091 | 6.03185  | 0.48480  |
| C | 5.98092  | 12.47669 | 2.46496  |
| H | 6.28704  | 11.50455 | 2.08682  |
| H | 6.53949  | 13.24477 | 1.92213  |
| H | 4.92197  | 12.62564 | 2.24760  |
| C | 4.58429  | 14.55054 | 4.39747  |
| H | 4.63513  | 14.71913 | 3.31903  |
| H | 4.80891  | 15.51331 | 4.86507  |
| C | 3.17678  | 14.10836 | 4.78969  |
| H | 2.43090  | 14.85089 | 4.50045  |
| H | 3.10716  | 13.95977 | 5.87027  |

|   |         |          |          |
|---|---------|----------|----------|
| H | 2.91862 | 13.16159 | 4.30926  |
| C | 5.78820 | 14.12855 | 7.26910  |
| H | 5.32984 | 15.07322 | 6.97258  |
| H | 6.66369 | 14.35063 | 7.88142  |
| H | 5.07429 | 13.60389 | 7.90866  |
| C | 7.86960 | 11.99603 | 8.28361  |
| C | 6.73970 | 11.67075 | 9.03161  |
| H | 5.91235 | 11.16251 | 8.54899  |
| C | 6.67991 | 11.99372 | 10.37959 |
| H | 5.80229 | 11.73167 | 10.95771 |
| C | 7.74479 | 12.65070 | 10.98599 |
| H | 7.69535 | 12.90751 | 12.03705 |
| C | 8.87627 | 12.97044 | 10.24494 |
| H | 9.70887 | 13.47856 | 10.71550 |
| C | 8.94459 | 12.63597 | 8.89875  |
| H | 9.82339 | 12.88384 | 8.31441  |
| B | 8.03471 | 10.79097 | 3.96965  |

Molecule 44\_7023928

Cartesian Coordinates (in Angstroms) and Total Electronic Potential Energy (in kcal/mol)

67

c44\_7023928.xyz.out Energy: -993861.2423103

|   |          |          |          |
|---|----------|----------|----------|
| C | 9.05579  | 9.02604  | 1.67843  |
| H | 8.95280  | 9.13875  | 2.74813  |
| C | 10.04274 | 9.70829  | 0.93941  |
| C | 10.07183 | 9.51476  | -0.47299 |
| H | 10.82738 | 10.00394 | -1.07067 |
| C | 9.16921  | 8.69242  | -1.09110 |
| H | 9.21329  | 8.55151  | -2.16499 |
| C | 8.18049  | 8.00781  | -0.36082 |
| C | 8.16321  | 8.20630  | 1.02500  |
| C | 7.21571  | 7.14036  | -0.91493 |
| H | 7.20212  | 6.96041  | -1.98496 |
| C | 6.28283  | 6.50638  | -0.14788 |
| C | 6.26751  | 6.73923  | 1.27899  |
| C | 5.31555  | 5.60679  | -0.83884 |
| C | 3.47015  | 4.04221  | -0.71686 |
| H | 3.95445  | 3.43019  | -1.48002 |
| H | 2.72048  | 4.64616  | -1.23812 |
| C | 2.84159  | 3.13877  | 0.32623  |
| H | 2.07709  | 2.50645  | -0.15328 |
| H | 3.61570  | 2.46805  | 0.71068  |
| C | 1.05792  | 4.56708  | 1.13959  |
| H | 0.19834  | 3.87987  | 1.10273  |
| H | 1.14880  | 5.01719  | 0.14655  |
| C | 0.75481  | 5.66209  | 2.13018  |
| C | 1.76079  | 6.53133  | 2.55074  |
| H | 2.76932  | 6.41108  | 2.17168  |
| C | 1.44438  | 7.53879  | 3.44586  |
| H | 2.20752  | 8.22732  | 3.78807  |



|   |          |          |          |
|---|----------|----------|----------|
| C | 0.13368  | 7.65138  | 3.89347  |
| H | -0.16023 | 8.42134  | 4.59489  |
| C | -0.79993 | 6.74623  | 3.41759  |
| H | -1.83319 | 6.80187  | 3.74417  |
| C | 2.14058  | 3.02136  | 2.62330  |
| H | 1.60269  | 2.09183  | 2.38200  |
| H | 1.54235  | 3.56355  | 3.36335  |
| C | 3.47451  | 2.67825  | 3.23004  |
| C | 4.33160  | 3.70877  | 3.60868  |
| H | 4.01625  | 4.73684  | 3.48242  |
| C | 5.57399  | 3.39499  | 4.12933  |
| H | 6.26187  | 4.18179  | 4.41549  |
| C | 5.91467  | 2.05475  | 4.27381  |
| H | 6.87410  | 1.75543  | 4.67554  |
| C | 4.99163  | 1.09672  | 3.88845  |
| H | 5.22295  | 0.04153  | 3.99091  |
| C | 11.87634 | 11.34915 | 0.80337  |
| H | 12.07504 | 12.23616 | 1.41040  |
| H | 11.39941 | 11.71196 | -0.10857 |
| C | 13.17641 | 10.62747 | 0.49297  |
| H | 13.66921 | 10.31225 | 1.41549  |
| H | 13.86064 | 11.28046 | -0.05159 |
| H | 12.99498 | 9.73691  | -0.11224 |
| C | 11.01943 | 10.63005 | 2.99949  |
| H | 12.05299 | 10.88602 | 3.24607  |
| H | 10.83610 | 9.65266  | 3.45034  |
| C | 10.07453 | 11.67895 | 3.56082  |
| H | 10.30167 | 12.66182 | 3.14178  |
| H | 10.16944 | 11.74212 | 4.64615  |
| H | 9.03618  | 11.44231 | 3.32043  |
| N | 10.94082 | 10.52201 | 1.55075  |
| N | 4.45441  | 4.90040  | -0.09204 |
| H | 4.41988  | 5.04091  | 0.91482  |
| N | 2.29721  | 3.87830  | 1.45467  |
| N | -0.50442 | 5.76740  | 2.55797  |
| N | 3.79553  | 1.39123  | 3.36900  |
| O | 7.22220  | 7.57873  | 1.78160  |
| O | 5.49049  | 6.27289  | 2.09344  |
| O | 5.32983  | 5.51792  | -2.07149 |

Molecule 45\_7219031

Cartesian Coordinates (in Angstroms) and Total Electronic Potential Energy (in kcal/mol)

69

c45\_7219031.xyz.out Energy: -986795.9045896

|   |          |          |          |
|---|----------|----------|----------|
| O | 5.73086  | 3.61703  | 7.38725  |
| O | 8.02636  | -1.00942 | 11.33375 |
| O | 6.37193  | -1.01356 | 9.89241  |
| N | 4.79720  | 1.78136  | 6.23529  |
| N | 11.52668 | -1.43136 | 14.51910 |
| C | 1.89479  | 3.89302  | 6.28505  |

|   |          |          |          |
|---|----------|----------|----------|
| H | 1.30488  | 4.38143  | 7.05410  |
| C | 1.55190  | 4.02584  | 4.93569  |
| H | 0.69181  | 4.61907  | 4.65063  |
| C | 2.31978  | 3.40569  | 3.95963  |
| H | 2.05268  | 3.52133  | 2.91574  |
| C | 3.44061  | 2.64126  | 4.29185  |
| H | 4.03323  | 2.17096  | 3.51661  |
| C | 3.76290  | 2.51463  | 5.63280  |
| C | 3.00034  | 3.14255  | 6.62186  |
| C | 3.57899  | 2.79540  | 7.97458  |
| C | 5.01297  | 2.38573  | 7.53694  |
| C | 6.01952  | 1.46574  | 5.52466  |
| H | 6.47558  | 0.58565  | 5.98985  |
| H | 5.78283  | 1.18792  | 4.49686  |
| C | 6.97159  | 2.62784  | 5.56352  |
| C | 8.05331  | 2.73575  | 4.69397  |
| H | 8.20690  | 1.95407  | 3.95648  |
| C | 8.91920  | 3.81685  | 4.75095  |
| H | 9.75274  | 3.88489  | 4.06315  |
| C | 8.70050  | 4.81804  | 5.69399  |
| H | 9.36461  | 5.67242  | 5.74543  |
| C | 7.63157  | 4.72883  | 6.56989  |
| H | 7.43862  | 5.49683  | 7.30964  |
| C | 6.77343  | 3.63341  | 6.50816  |
| C | 5.73441  | 1.45460  | 8.46094  |
| H | 5.35863  | 0.44009  | 8.48407  |
| C | 6.76388  | 1.83800  | 9.22210  |
| H | 7.09477  | 2.87182  | 9.14736  |
| C | 7.53761  | 1.04903  | 10.17239 |
| C | 8.56665  | 1.62747  | 10.85615 |
| H | 8.79349  | 2.67451  | 10.67583 |
| C | 9.35491  | 0.91625  | 11.79445 |
| C | 10.42698 | 1.45365  | 12.52639 |
| H | 10.68491 | 2.49708  | 12.38275 |
| C | 11.14004 | 0.69332  | 13.41710 |
| H | 11.94315 | 1.15703  | 13.97191 |
| C | 10.82033 | -0.67694 | 13.63323 |
| C | 9.74788  | -1.22308 | 12.90308 |
| H | 9.45522  | -2.25975 | 12.99069 |
| C | 9.05003  | -0.42955 | 12.01765 |
| C | 7.24435  | -0.35615 | 10.41847 |
| C | 3.57485  | 3.93305  | 8.98074  |
| H | 2.55450  | 4.11028  | 9.32975  |
| H | 4.18257  | 3.67007  | 9.85217  |
| H | 3.95941  | 4.85796  | 8.55264  |
| C | 2.83188  | 1.59242  | 8.55272  |
| H | 1.78165  | 1.85752  | 8.69329  |
| H | 2.87932  | 0.73080  | 7.88361  |
| H | 3.24551  | 1.30502  | 9.52300  |
| C | 12.71740 | -0.93210 | 15.18786 |
| H | 13.35738 | -1.79460 | 15.39210 |

|   |          |          |          |
|---|----------|----------|----------|
| H | 13.28386 | -0.29499 | 14.50620 |
| C | 12.40038 | -0.20142 | 16.48178 |
| H | 13.31517 | 0.14624  | 16.96527 |
| H | 11.75919 | 0.66275  | 16.29607 |
| H | 11.87890 | -0.86335 | 17.17696 |
| C | 11.13856 | -2.79396 | 14.84469 |
| H | 11.48189 | -2.99255 | 15.86328 |
| H | 10.04960 | -2.86744 | 14.87584 |
| C | 11.72781 | -3.81675 | 13.88761 |
| H | 11.42301 | -4.82728 | 14.16534 |
| H | 11.40106 | -3.62927 | 12.86284 |
| H | 12.81928 | -3.77343 | 13.90643 |

Molecule 46\_2212633

Cartesian Coordinates (in Angstroms) and Total Electronic Potential Energy (in kcal/mol)

57

c46\_2212633.xyz.out Energy: -877535.9583367

|   |          |         |          |
|---|----------|---------|----------|
| N | 13.08828 | 7.07492 | 0.89289  |
| O | 4.80922  | 7.73226 | 0.38151  |
| C | 5.41630  | 7.48839 | -0.66077 |
| C | 4.70362  | 7.18626 | -1.91025 |
| H | 5.28294  | 6.85528 | -2.75925 |
| C | 3.36967  | 7.32881 | -1.96393 |
| H | 2.86889  | 7.68695 | -1.06731 |
| C | 6.90085  | 7.44799 | -0.62505 |
| C | 7.72656  | 7.54675 | -1.81443 |
| O | 7.36453  | 7.71363 | -2.95935 |
| O | 9.08643  | 7.46783 | -1.62570 |
| C | 9.68742  | 7.34097 | -0.41451 |
| C | 11.06190 | 7.27390 | -0.39378 |
| H | 11.58572 | 7.30874 | -1.33824 |
| C | 11.73476 | 7.13916 | 0.83787  |
| C | 10.94849 | 7.07639 | 2.02665  |
| H | 11.42974 | 6.99584 | 2.99059  |
| C | 9.58341  | 7.14281 | 1.97122  |
| H | 9.00248  | 7.10042 | 2.88555  |
| C | 8.90349  | 7.27751 | 0.74574  |
| C | 7.50481  | 7.34132 | 0.59758  |
| H | 6.87040  | 7.29513 | 1.47718  |
| C | 13.91365 | 7.26280 | -0.29077 |
| H | 13.47075 | 8.03173 | -0.92645 |
| H | 14.87189 | 7.66502 | 0.04695  |
| C | 14.13095 | 5.97186 | -1.06161 |
| H | 13.18159 | 5.55199 | -1.39991 |
| H | 14.75988 | 6.14645 | -1.93615 |
| H | 14.62322 | 5.22805 | -0.43093 |
| C | 13.80677 | 6.81290 | 2.13122  |
| H | 13.24806 | 6.09857 | 2.73782  |
| H | 14.73873 | 6.31020 | 1.86051  |
| C | 14.10556 | 8.08121 | 2.91185  |

|   |          |         |          |
|---|----------|---------|----------|
| H | 13.18384 | 8.59612 | 3.19035  |
| H | 14.66097 | 7.85229 | 3.82302  |
| H | 14.70611 | 8.76760 | 2.31058  |
| C | 2.50719  | 7.06352 | -3.10498 |
| C | 1.14814  | 7.26037 | -2.96935 |
| H | 0.75141  | 7.60641 | -2.01957 |
| C | 0.25459  | 7.02504 | -4.03340 |
| C | -1.14400 | 7.22640 | -3.90257 |
| H | -1.53567 | 7.57020 | -2.95167 |
| C | -1.98443 | 6.99482 | -4.94979 |
| H | -3.05400 | 7.14466 | -4.86688 |
| C | -1.47030 | 6.54648 | -6.19249 |
| C | -0.12216 | 6.33866 | -6.35694 |
| H | 0.28917  | 5.99630 | -7.29800 |
| C | 0.76234  | 6.57530 | -5.27842 |
| C | 2.16237  | 6.37774 | -5.40425 |
| H | 2.55443  | 6.03665 | -6.35623 |
| C | 3.00604  | 6.61255 | -4.35801 |
| H | 4.07059  | 6.45914 | -4.48640 |
| O | -2.40086 | 6.35340 | -7.15749 |
| C | -1.95652 | 5.90818 | -8.42267 |
| H | -1.46917 | 4.93192 | -8.34774 |
| H | -2.84130 | 5.82083 | -9.04878 |
| H | -1.26537 | 6.62668 | -8.87238 |

Molecule 47\_4028361

Cartesian Coordinates (in Angstroms) and Total Electronic Potential Energy (in kcal/mol)

68

c47\_4028361.xyz.out Energy: -1259158.6353427

|   |          |          |          |
|---|----------|----------|----------|
| C | 9.81770  | 14.32870 | 5.85421  |
| C | 10.32867 | 15.34555 | 6.79007  |
| C | 10.64634 | 16.64975 | 6.42745  |
| H | 10.53421 | 16.96147 | 5.39579  |
| C | 11.09196 | 17.51722 | 7.41117  |
| H | 11.34482 | 18.53975 | 7.16044  |
| C | 11.21225 | 17.07764 | 8.73122  |
| H | 11.55979 | 17.76584 | 9.49229  |
| C | 10.89336 | 15.77230 | 9.08273  |
| H | 10.99010 | 15.43169 | 10.10816 |
| C | 10.44646 | 14.90644 | 8.09602  |
| C | 10.07325 | 13.45850 | 8.36392  |
| C | 8.94279  | 13.33806 | 9.34744  |
| C | 7.74191  | 14.10314 | 9.09968  |
| C | 6.75221  | 13.16319 | 11.07392 |
| C | 5.63316  | 13.13461 | 11.88029 |
| H | 4.80138  | 13.76707 | 11.60453 |
| C | 5.61442  | 12.31991 | 13.02668 |
| C | 3.28665  | 12.95639 | 13.50306 |
| H | 2.46911  | 12.39643 | 13.96444 |
| H | 3.11709  | 12.90192 | 12.42586 |

|   |          |          |          |
|---|----------|----------|----------|
| C | 3.26893  | 14.39688 | 13.98683 |
| H | 3.38568  | 14.43645 | 15.07239 |
| H | 2.32535  | 14.88071 | 13.72839 |
| H | 4.08247  | 14.97142 | 13.53942 |
| C | 4.52426  | 11.53448 | 15.09319 |
| H | 3.81531  | 12.03392 | 15.75864 |
| H | 5.50006  | 11.62741 | 15.57372 |
| C | 4.13592  | 10.07560 | 14.92166 |
| H | 3.13537  | 9.99471  | 14.49064 |
| H | 4.13449  | 9.55858  | 15.88304 |
| H | 4.83082  | 9.56080  | 14.25494 |
| C | 6.77653  | 11.54957 | 13.30774 |
| H | 6.79830  | 10.89358 | 14.16631 |
| C | 7.87711  | 11.60169 | 12.49005 |
| H | 8.74778  | 11.00131 | 12.72178 |
| C | 7.89529  | 12.41224 | 11.34629 |
| C | 8.99676  | 12.52666 | 10.44194 |
| C | 11.21324 | 11.89683 | 10.00486 |
| C | 12.29576 | 11.17260 | 10.47872 |
| H | 12.14613 | 10.60035 | 11.38342 |
| C | 13.52131 | 11.19949 | 9.79846  |
| C | 13.59288 | 12.01661 | 8.64398  |
| H | 14.51231 | 12.09491 | 8.08178  |
| C | 12.49380 | 12.72082 | 8.20639  |
| H | 12.57976 | 13.32546 | 7.30830  |
| C | 11.26535 | 12.68403 | 8.86961  |
| C | 14.52642 | 9.70729  | 11.46258 |
| H | 15.31952 | 8.95763  | 11.43750 |
| H | 13.58837 | 9.14672  | 11.49158 |
| C | 14.66720 | 10.56538 | 12.71295 |
| H | 15.67017 | 10.98757 | 12.78961 |
| H | 14.48573 | 9.96690  | 13.60822 |
| H | 13.95382 | 11.39228 | 12.70752 |
| C | 15.90090 | 10.63233 | 9.60446  |
| H | 15.80171 | 10.56860 | 8.51774  |
| H | 16.51362 | 9.77794  | 9.89717  |
| C | 16.60130 | 11.92680 | 9.99406  |
| H | 15.97251 | 12.79512 | 9.78700  |
| H | 17.53015 | 12.04023 | 9.43110  |
| H | 16.84803 | 11.93691 | 11.05660 |
| N | 14.59410 | 10.44945 | 10.21548 |
| N | 4.52217  | 12.26732 | 13.83760 |
| O | 9.61503  | 14.47773 | 4.66933  |
| O | 7.57545  | 14.85286 | 8.16194  |
| O | 6.70552  | 13.97744 | 9.98444  |
| O | 10.06681 | 11.78707 | 10.76372 |
| S | 9.56221  | 12.81491 | 6.71162  |

Molecule 48\_1544743\_doublet.xyz

Cartesian Coordinates (in Angstroms) and Total Electronic Potential Energy (in kcal/mol)

61

c48\_1544743\_doublet.out Energy: -1020434.2200562

|    |          |          |          |
|----|----------|----------|----------|
| Au | 9.09817  | 20.87333 | 5.81214  |
| C  | 8.68475  | 19.77118 | 7.51786  |
| N  | 10.08844 | 22.00975 | 7.15297  |
| N  | 3.39535  | 14.32837 | -0.98040 |
| C  | 9.28277  | 20.36939 | 8.66228  |
| O  | 5.42025  | 16.05073 | 2.98291  |
| C  | 4.71630  | 16.37461 | -1.07448 |
| H  | 4.55328  | 16.46489 | -2.14800 |
| C  | 3.00668  | 14.44972 | -2.37789 |
| H  | 2.80155  | 15.50500 | -2.61524 |
| H  | 2.04069  | 13.93253 | -2.49518 |
| C  | 10.06113 | 21.60708 | 8.44141  |
| C  | 2.90879  | 13.14954 | -0.27919 |
| H  | 3.67865  | 12.79461 | 0.42327  |
| H  | 2.80004  | 12.34587 | -1.02524 |
| C  | 4.15835  | 15.27438 | -0.35295 |
| C  | 10.58625 | 23.30051 | 5.22961  |
| C  | 4.02813  | 13.86488 | -3.34195 |
| H  | 3.68308  | 13.95866 | -4.38268 |
| H  | 4.19418  | 12.79617 | -3.13425 |
| H  | 4.99848  | 14.37761 | -3.25426 |
| C  | 9.81830  | 22.33217 | 4.52474  |
| C  | 11.42047 | 23.51952 | 8.94961  |
| H  | 11.95969 | 24.13068 | 9.67692  |
| C  | 5.48384  | 17.32867 | -0.43958 |
| H  | 5.90177  | 18.15758 | -1.01700 |
| C  | 8.12753  | 19.74192 | 4.54627  |
| C  | 6.73856  | 18.07406 | 3.02416  |
| C  | 6.53140  | 18.20814 | 1.67599  |
| H  | 6.96733  | 19.06061 | 1.14799  |
| C  | 5.75420  | 17.26213 | 0.94332  |
| C  | 6.15160  | 16.92845 | 3.73479  |
| C  | 11.00010 | 24.50898 | 3.17482  |
| H  | 11.45598 | 25.34975 | 2.64705  |
| C  | 4.42811  | 15.20035 | 1.03352  |
| H  | 4.03083  | 14.40879 | 1.66773  |
| C  | 11.17126 | 24.37878 | 4.55279  |
| H  | 11.76202 | 25.12115 | 5.09593  |
| C  | 10.72633 | 23.10495 | 6.68812  |
| C  | 10.74659 | 22.37632 | 9.38448  |
| H  | 10.75538 | 22.08967 | 10.43620 |
| C  | 9.66158  | 22.48406 | 3.14634  |
| H  | 9.07485  | 21.75007 | 2.58616  |
| C  | 5.20420  | 16.17362 | 1.64434  |
| C  | 9.12620  | 19.79245 | 9.93816  |
| H  | 9.57708  | 20.24091 | 10.82867 |
| C  | 7.49626  | 18.99012 | 3.81376  |
| C  | 7.93816  | 18.59904 | 7.66621  |
| H  | 7.47333  | 18.12892 | 6.79315  |

|   |          |          |          |
|---|----------|----------|----------|
| C | 7.77448  | 18.00967 | 8.93389  |
| H | 7.19011  | 17.09189 | 9.04791  |
| C | 10.24677 | 23.56384 | 2.47434  |
| H | 10.11380 | 23.66829 | 1.39417  |
| C | 1.58554  | 13.37689 | 0.43669  |
| H | 0.80270  | 13.68049 | -0.27607 |
| H | 1.67347  | 14.16861 | 1.19659  |
| H | 1.24936  | 12.45728 | 0.93873  |
| C | 8.37808  | 18.64098 | 9.99867  |
| C | 11.41984 | 23.89825 | 7.60589  |
| H | 11.94956 | 24.79299 | 7.27834  |
| O | 6.25969  | 16.69795 | 4.91859  |

Molecule 48\_1544743

Cartesian Coordinates (in Angstroms) and Total Electronic Potential Energy (in kcal/mol)

61

c48\_1544743.xyz.out

|    |          |          |          |
|----|----------|----------|----------|
| Au | 9.00034  | 20.84890 | 5.86773  |
| C  | 8.09001  | 20.20340 | 7.61468  |
| N  | 9.92588  | 22.07010 | 7.16215  |
| N  | 3.56248  | 14.34890 | -1.10811 |
| C  | 8.59022  | 20.91810 | 8.73647  |
| O  | 6.80576  | 15.70010 | 2.12313  |
| C  | 3.87202  | 16.69780 | -0.60396 |
| H  | 3.21651  | 16.92740 | -1.25271 |
| C  | 2.26002  | 14.62330 | -1.72834 |
| H  | 1.81123  | 15.34780 | -1.22399 |
| H  | 1.69448  | 13.81320 | -1.65880 |
| C  | 9.62061  | 21.93810 | 8.47740  |
| C  | 3.91273  | 12.93420 | -0.95583 |
| H  | 4.89814  | 12.84750 | -0.94426 |
| H  | 3.57533  | 12.43410 | -1.74109 |
| C  | 4.22763  | 15.32840 | -0.43040 |
| C  | 10.98630 | 22.84430 | 5.20240  |
| C  | 2.36070  | 15.03070 | -3.19127 |
| H  | 1.46526  | 15.22300 | -3.53983 |
| H  | 2.76022  | 14.30020 | -3.70700 |
| H  | 2.92089  | 15.83070 | -3.27042 |
| C  | 10.22690 | 21.84990 | 4.53646  |
| C  | 11.21660 | 23.68420 | 8.90056  |
| H  | 11.67610 | 24.24630 | 9.51273  |
| C  | 4.44720  | 17.68710 | 0.13642  |
| H  | 4.18157  | 18.58880 | -0.00526 |
| C  | 8.08144  | 19.66450 | 4.59106  |
| C  | 6.94501  | 18.00610 | 2.89948  |
| C  | 6.00672  | 18.35780 | 1.97558  |
| H  | 5.73359  | 19.26610 | 1.91267  |
| C  | 5.43047  | 17.40150 | 1.10954  |
| C  | 7.38630  | 16.61190 | 2.97235  |
| C  | 12.00170 | 23.49270 | 3.12689  |

|   |          |          |          |
|---|----------|----------|----------|
| H | 12.58110 | 24.06420 | 2.63641  |
| C | 5.27838  | 15.04010 | 0.46420  |
| H | 5.60399  | 14.15080 | 0.55010  |
| C | 11.85920 | 23.66230 | 4.49734  |
| H | 12.35620 | 24.33430 | 4.95032  |
| C | 10.82240 | 22.94600 | 6.66165  |
| C | 10.28150 | 22.75450 | 9.38090  |
| H | 10.10370 | 22.68510 | 10.31200 |
| C | 10.41540 | 21.67370 | 3.17629  |
| H | 9.93766  | 20.99090 | 2.71939  |
| C | 5.82892  | 16.05470 | 1.21057  |
| C | 8.10822  | 20.63860 | 10.01000 |
| H | 8.44990  | 21.10960 | 10.76100 |
| C | 7.55339  | 18.92380 | 3.81385  |
| C | 7.12281  | 19.23250 | 7.81439  |
| H | 6.78541  | 18.74430 | 7.07348  |
| C | 6.64189  | 18.96820 | 9.09456  |
| H | 5.97673  | 18.30240 | 9.22114  |
| C | 11.30120 | 22.49070 | 2.46862  |
| H | 11.42330 | 22.35980 | 1.53675  |
| C | 3.34826  | 12.30220 | 0.30982  |
| H | 2.38105  | 12.45460 | 0.34727  |
| H | 3.77348  | 12.70630 | 1.09511  |
| H | 3.52606  | 11.33740 | 0.30088  |
| C | 7.13031  | 19.67530 | 10.18470 |
| C | 11.47680 | 23.79160 | 7.55244  |
| H | 12.09590 | 24.43660 | 7.23348  |
| O | 8.25817  | 16.19020 | 3.70003  |

Molecule 49\_7229754

Cartesian Coordinates (in Angstroms) and Total Electronic Potential Energy (in kcal/mol)

69

c49\_7229754.xyz.out Energy: -1067797.2877394

|   |          |          |          |
|---|----------|----------|----------|
| O | 10.27680 | 10.93587 | 11.02651 |
| O | 11.27242 | 9.80162  | 9.41100  |
| N | 10.80518 | 11.80643 | 7.50792  |
| N | 10.80789 | 11.70693 | 5.30745  |
| O | 8.59893  | 12.71592 | 4.14770  |
| H | 9.55068  | 12.47077 | 4.23021  |
| C | 10.36849 | 11.91953 | 8.85112  |
| C | 10.68711 | 10.81073 | 9.73250  |
| C | 9.21722  | 13.04884 | 10.63821 |
| C | 12.13504 | 11.81141 | 7.11032  |
| C | 10.03890 | 11.71826 | 6.37718  |
| C | 12.11179 | 11.76183 | 5.73851  |
| C | 9.66199  | 12.98518 | 9.29127  |
| H | 9.42383  | 13.79372 | 8.60721  |
| C | 9.55367  | 11.99488 | 11.49478 |
| C | 13.24531 | 11.82259 | 8.07275  |
| C | 8.57775  | 11.66403 | 6.32277  |



|   |          |          |          |
|---|----------|----------|----------|
| C | 13.22858 | 11.77100 | 4.78554  |
| C | 8.47593  | 14.10524 | 11.19174 |
| H | 8.19994  | 14.93791 | 10.55472 |
| C | 9.19157  | 11.96341 | 12.82400 |
| H | 9.51209  | 11.11381 | 13.40939 |
| N | 8.02531  | 12.99985 | 14.67015 |
| C | 7.80198  | 11.07328 | 7.32613  |
| H | 8.29404  | 10.58914 | 8.16052  |
| C | 13.08821 | 11.12998 | 3.55273  |
| H | 12.15621 | 10.62737 | 3.32387  |
| C | 13.36815 | 12.82949 | 9.03054  |
| H | 12.64505 | 13.63696 | 9.05634  |
| C | 7.92329  | 12.19508 | 5.19576  |
| C | 8.10002  | 14.10289 | 12.50995 |
| H | 7.53091  | 14.93952 | 12.88813 |
| C | 8.43811  | 13.02020 | 13.37035 |
| C | 14.19503 | 10.80070 | 8.03151  |
| H | 14.08823 | 10.01175 | 7.29599  |
| C | 14.43099 | 12.42313 | 5.07117  |
| H | 14.54554 | 12.95304 | 6.00947  |
| C | 15.47133 | 12.41723 | 4.15294  |
| H | 16.39577 | 12.93111 | 4.38800  |
| C | 15.32626 | 11.76748 | 2.93239  |
| H | 16.13910 | 11.76510 | 2.21627  |
| C | 6.41967  | 11.06296 | 7.25607  |
| H | 5.84159  | 10.59359 | 8.04153  |
| C | 14.12876 | 11.12797 | 2.63448  |
| H | 14.00479 | 10.62227 | 1.68431  |
| C | 6.53187  | 12.20221 | 5.13767  |
| H | 6.06070  | 12.63540 | 4.26377  |
| C | 5.78564  | 11.64768 | 6.16271  |
| H | 4.70417  | 11.65174 | 6.09904  |
| C | 15.36676 | 11.79382 | 9.88471  |
| H | 16.18960 | 11.78107 | 10.58915 |
| C | 15.25202 | 10.78986 | 8.92846  |
| H | 15.98165 | 9.99029  | 8.88976  |
| C | 14.42351 | 12.81200 | 9.93464  |
| H | 14.51206 | 13.59976 | 10.67296 |
| C | 8.41323  | 11.90848 | 15.55198 |
| H | 7.70182  | 11.89177 | 16.37911 |
| H | 8.27862  | 10.96235 | 15.02330 |
| C | 9.83211  | 12.02326 | 16.08943 |
| H | 9.93002  | 12.87897 | 16.75902 |
| H | 10.09882 | 11.12557 | 16.65049 |
| H | 10.55368 | 12.14347 | 15.27872 |
| C | 7.42279  | 14.17783 | 15.28044 |
| H | 6.96922  | 13.85292 | 16.21760 |
| H | 6.59809  | 14.52960 | 14.65545 |
| C | 8.40684  | 15.30723 | 15.54847 |
| H | 8.92872  | 15.60539 | 14.63707 |
| H | 7.88138  | 16.18110 | 15.93858 |

H 9.15727 15.00854 16.28145

Molecule 50\_7229755

Cartesian Coordinates (in Angstroms) and Total Electronic Potential Energy (in kcal/mol)

68

c50\_7229755.xyz.out Energy: -1020608.9465664

|   |          |         |          |
|---|----------|---------|----------|
| O | 5.77570  | 3.68964 | 4.65991  |
| N | 4.67343  | 4.38574 | 8.07366  |
| N | 2.70263  | 4.33026 | 9.08526  |
| O | 3.78366  | 4.21520 | 5.46374  |
| N | 9.92856  | 2.61064 | 2.61271  |
| C | 7.70248  | 3.49343 | 6.06982  |
| C | 6.87832  | 3.80374 | 7.18537  |
| H | 7.31370  | 3.83290 | 8.17875  |
| C | 3.59626  | 3.61822 | 8.44734  |
| C | 5.56033  | 4.04805 | 7.01851  |
| C | 5.24081  | 6.82786 | 8.10391  |
| C | 3.17566  | 5.62334 | 9.10960  |
| C | 7.11019  | 3.44235 | 4.80355  |
| C | 9.19470  | 2.87349 | 3.73256  |
| C | 9.80458  | 2.91156 | 5.01782  |
| H | 10.85924 | 2.70431 | 5.12512  |
| C | 2.42471  | 6.69466 | 9.77605  |
| C | 4.38369  | 5.69100 | 8.46088  |
| C | 7.81391  | 3.13888 | 3.65813  |
| H | 7.26470  | 3.10880 | 2.72820  |
| C | 9.07672  | 3.21701 | 6.13906  |
| H | 9.56672  | 3.24501 | 7.10574  |
| C | 3.06595  | 7.79528 | 10.35084 |
| H | 4.14781  | 7.85770 | 10.33066 |
| C | 3.47607  | 2.19136 | 8.13190  |
| C | 6.58446  | 6.87319 | 8.47977  |
| H | 7.00014  | 6.06094 | 9.06522  |
| C | 1.03248  | 6.61465 | 9.85337  |
| H | 0.53188  | 5.75833 | 9.41818  |
| C | 11.30946 | 2.15797 | 2.71397  |
| H | 11.75019 | 2.25784 | 1.72123  |
| H | 11.86908 | 2.84041 | 3.35873  |
| C | 4.95183  | 4.00217 | 5.69884  |
| C | 2.33129  | 8.79772 | 10.96840 |
| H | 2.84497  | 9.64199 | 11.41277 |
| C | 0.29953  | 7.61658 | 10.47346 |
| H | -0.78033 | 7.54034 | 10.52073 |
| C | 9.28266  | 2.51795 | 1.31135  |
| H | 8.59001  | 3.35496 | 1.20004  |
| H | 10.05547 | 2.66682 | 0.55566  |
| C | 0.94488  | 8.71515 | 11.02943 |
| H | 0.37269  | 9.49761 | 11.51319 |
| C | 4.70033  | 7.89652 | 7.38624  |
| H | 3.65791  | 7.85818 | 7.09097  |

|   |          |          |         |
|---|----------|----------|---------|
| C | 7.37432  | 7.96321  | 8.13938 |
| H | 8.41462  | 7.98972  | 8.44047 |
| C | 2.23472  | 1.69349  | 7.73440 |
| H | 1.39776  | 2.37594  | 7.65299 |
| C | 6.82783  | 9.02346  | 7.42590 |
| H | 7.44316  | 9.87521  | 7.16266 |
| C | 4.56269  | 1.32087  | 8.22975 |
| H | 5.52204  | 1.69192  | 8.57011 |
| C | 11.45735 | 0.72402  | 3.20177 |
| H | 11.02063 | 0.02090  | 2.49143 |
| H | 12.51309 | 0.47280  | 3.32134 |
| H | 10.96347 | 0.57808  | 4.16443 |
| C | 5.48869  | 8.98882  | 7.05311 |
| H | 5.05839  | 9.81170  | 6.49547 |
| C | 8.56693  | 1.19714  | 1.06891 |
| H | 7.85543  | 0.98008  | 1.86826 |
| H | 8.01774  | 1.23104  | 0.12606 |
| H | 9.27708  | 0.37064  | 1.01501 |
| C | 2.08414  | 0.34744  | 7.43698 |
| H | 1.11772  | -0.02904 | 7.12465 |
| C | 3.17131  | -0.51463 | 7.52958 |
| H | 3.05314  | -1.56538 | 7.29412 |
| C | 4.40930  | -0.02557 | 7.92860 |
| H | 5.25587  | -0.69578 | 8.01554 |

## References

- 1 J.-S. Wu, W.-M. Liu, X.-Q. Zhuang, F. Wang, P.-F. Wang, S.-L. Tao, X.-H. Zhang, S.-K. Wu and S.-T. Lee, *Org Lett*, 2007, **9**, 33–36.
- 2 J. Ordóñez-Hernández, A. Jiménez-Sánchez, H. García-Ortega, N. Sánchez-Puig, M. Flores-Álamo, R. Santillan and N. Farfán, *Dyes and Pigments*, 2018, **157**, 305–313.
